# Supplementary material for: Tetracene cyclophanes showing controlled intramolecular singlet fission by through-space orientations
Source: Royal Society of Chemistry journal article supplement (doi:10.1039/d4cc00278d), 2024-01-01
Supplement: d4cc00278d1.pdf [file d4cc00278d1.pdf]

# ELECTRONIC SUPPLEMENTARY INFORMATION

## Tetracene cyclophanes showing the controlled Intramolecular singlet fission by through-space orientations

Hayato Sakai, Keigo Nonaka, Ryo Hayasaka, Shakkeeb Thazhathethil,  
Yoshimitsu Sagara\* and Taku Hasobe\*

### Table of Contents

|                                                                        |             |
|------------------------------------------------------------------------|-------------|
| <b>1. Experimental Section</b> .....                                   | <b>S2</b>   |
| <b>2. Syntheses and Characterizations</b> .....                        | <b>S4</b>   |
| <b>3. Density Functional Theory (DFT) Calculations</b> .....           | <b>S45</b>  |
| <b>4. Steady-State Spectroscopies and Fluorescence Lifetimes</b> ..... | <b>S102</b> |
| <b>5. Transient Absorption Spectra</b> .....                           | <b>S104</b> |
| <b>6. Calculation Processes of Triplet Yields</b> .....                | <b>S109</b> |
| <b>7. Solvent Dependence of Transient Absorption Spectra</b> .....     | <b>S119</b> |
| <b>8. References</b> .....                                             | <b>S125</b> |

## Experimental Section

### General and Materials.

All reagents and solvents were purchased from FUJIFILM Wako Pure Chemical Corporation, Tokyo Kasei, Kanto Chemical, Merck, or Fluorochem. All reactions were carried out under nitrogen atmosphere unless otherwise noted. All reactions that require heating were conducted with an oil bath as the heat source. Flash silica gel column chromatography was conducted with a Biotage Isolera Flash system using SHOKO-scientific Purif-Pack-EX cartridges. Recycling preparative gel permeation chromatography (GPC) was performed with a Japan Analytical Industry LaboACE. <sup>1</sup>H NMR spectra were measured with a JEOL JNM-ECZ400S spectrometer and all chemical shifts are reported on the  $\delta$ -scale in ppm relative to the signal of tetramethylsilane (TMS at 0.00) or residual solvent protons (THF at 1.72) as the internal standard. Coupling constants (*J*) are quoted in Hz and relative intensities are reported. Proton-decoupled <sup>13</sup>C NMR spectra were acquired on a JEOL JNM-ECZ400S spectrometer and all chemical shifts are expressed in ppm using solvent as the internal standard (CDCl<sub>3</sub> at 77.16). High-resolution electrospray ionization (ESI) mass spectra were measured with a Bruker Daltonics micrOTOF II.

**Spectroscopic Measurements.** UV-VIS absorption spectra were recorded on Agilent (8453) UV-VIS-NIR spectrophotometer. Fluorescence spectra were recorded on JASCO (FP-8500) spectrofluorophotometer.

**Nanosecond Laser Flash Photolysis.** Nanosecond transient absorption measurements were carried out using Unisoku TSP-2000 flash spectrometer. Surelite-I Nd-YAG (Q-switched) laser was employed for the flash photo-irradiation. A 150 W Xenon arc and halogen lamps were used as the monitor light source.

**Picosecond Transient Absorption Measurement.**<sup>1</sup> Picosecond transient absorption measurement was conducted by the device made by Unisoku Co., Ltd. Measurement method used in this measurement was Randomly Interleaved Pulse Train Method.

**Femtosecond Pump-Probe System.** The transient absorption spectroscopy measurements were carried out using a home-made femtosecond pump-probe system. Yb laser (PH2-10W, Light Conversion) was used to create fundamental light pulses at 1030 nm  $\pm$  10 nm at a repetition rate of 1 kHz. The pulse energy was 200 mJ, and the

pulse duration was approximately 290 fs. 40 % of the fundamental beam was utilized to generate SHG (515 nm) and THG (343 nm) for sample pumping. The rest of the beam was delivered to a delay stage then attenuated appropriately and focused onto liquid D<sub>2</sub>O or a sapphire crystal to generate a stable white light continuum for sample probing. The probe light was introduced to polychromators equipped with a CMOS array (USP-PSMM-PK120, Unisoku) for the visible part of the spectrum and an InGaAs diode array (USP-NIR-PDA256, Unisoku) for the near-infrared (NIR) wavelengths. The measurements were carried out by comparing responses with and without excitation using a chopper synchronized with the fundamental laser pulses. The spectra were typically acquired by recording 2000 shots, that is, averaging over 2 s. Excitation energies were sufficiently lowered to avoid multiple exciton generation; this was verified by recording a series of measurements with different excitation energies for the same sample. No excitation energy dependence of the response was observed.

**Global and Target Analysis.**<sup>2</sup> Global (singular value decomposition-based) and target (differential equation-based) analysis is accomplished using the Glotaran software package (<http://glotaran.org>).

## Synthesis of (Tet)<sub>2</sub>-CyO<sub>10</sub>, (Tet)<sub>2</sub>-CyO<sub>12</sub>, and Tet-ref

The synthetic routes used to prepare compounds (Tet)<sub>2</sub>-CyO<sub>10</sub>, (Tet)<sub>2</sub>-CyO<sub>12</sub>, and Tet-ref are shown in the schemes S1, S2, and S3. 2-(2-Azidoethoxy)ethyl *p*-toluenesulfonate, 5,12-bis[(triisopropylsilyl)ethynyl]tetracene, 3-bromo-1-(triisopropylsilyl)-1-propyne, triethylene glycol *p*-toluenesulfonate, and 2-[2-(2-methoxyethoxy)ethoxy]ethyl *p*-toluenesulfonate were prepared according to reported procedures.<sup>3-7</sup>

### Scheme S1 Synthesis of (Tet)<sub>2</sub>-CyO<sub>10</sub>

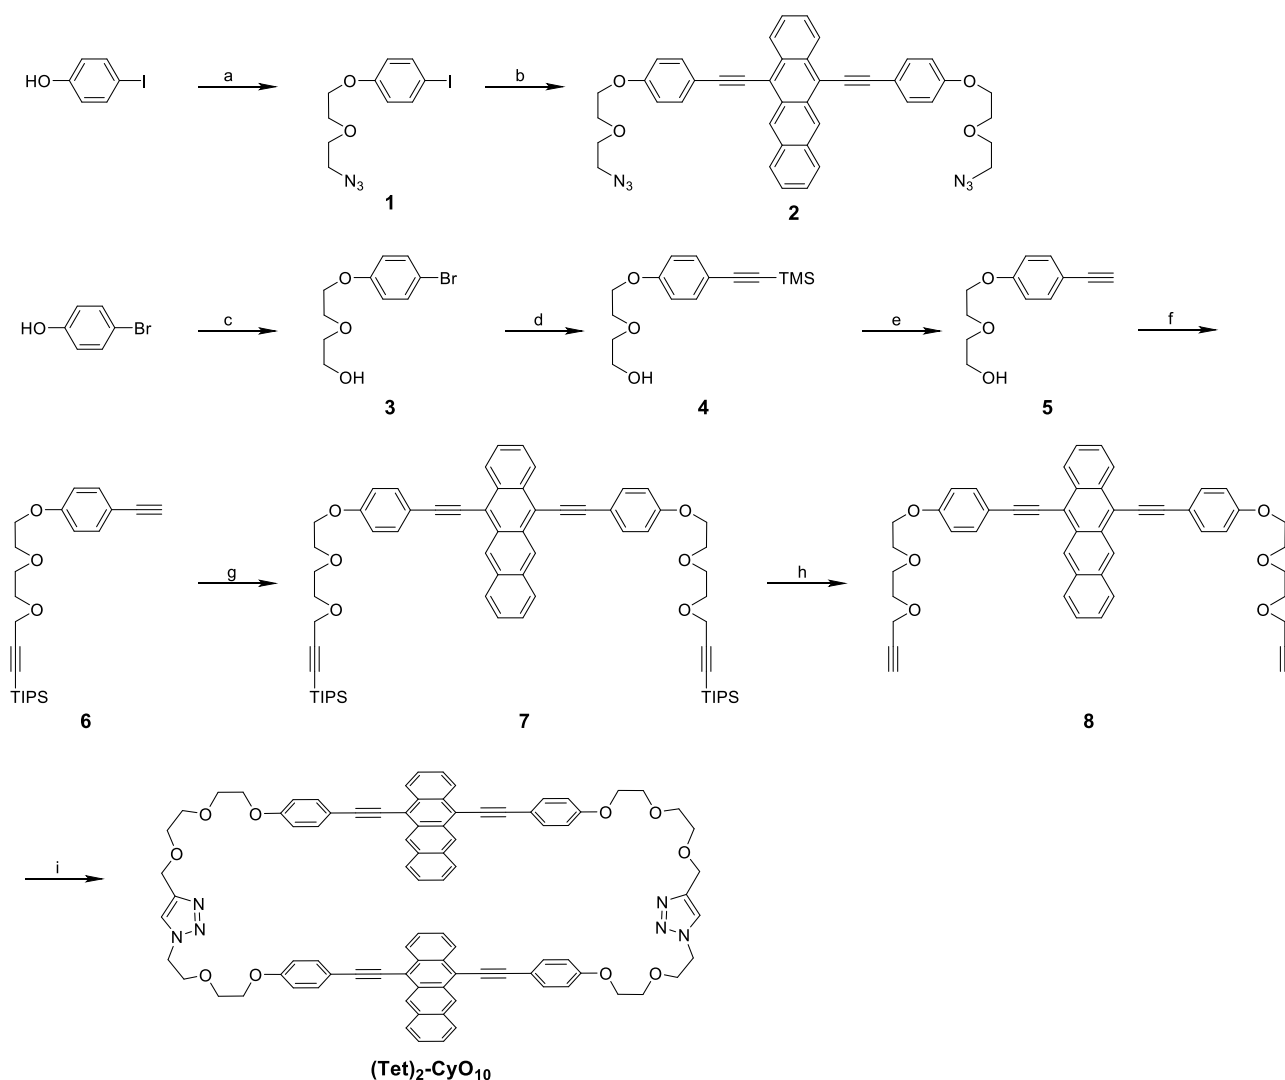

Conditions: (a) 2-(2-azidoethoxy)ethyl *p*-toluenesulfonate, K<sub>2</sub>CO<sub>3</sub>, DMF, 80 °C, 20 h; (b) 5,12-bis[(triisopropylsilyl)ethynyl]tetracene, tetrabutylammonium fluoride, Pd(PPh<sub>3</sub>)<sub>4</sub>, CuI, diisopropylamine, THF, 80 °C, 2 h; (c) 2-(2-chloroethoxy)ethanol, K<sub>2</sub>CO<sub>3</sub>, DMF,

110 °C, 24 h; (d) trimethylsilylacetylene, Pd(PPh<sub>3</sub>)<sub>4</sub>, CuI, triethylamine, THF, 80 °C, 24 h; (e) tetrabutylammonium fluoride, THF, r.t., 1 h; (f) 3-bromo-1-(triisopropylsilyl)-1-propyne, NaH, THF, 0 °C → r.t., 8 h; (g) i) *n*-butyllithium, THF, -78 °C → 0 °C, 40 min, ii) 5,12-naphthacenequinone, THF, r.t., 12 h, iii) H<sup>+</sup>, iv) 10% aq. HCl, SnCl<sub>2</sub>, r.t., 2 h; (h) tetrabutylammonium fluoride, THF, r.t., 1 h; (i) compound **2**, CuI, *N,N*-diisopropylethylamine, CHCl<sub>3</sub>, 60 °C, 24 h.

**Compound 1.** A mixture of 4-iodophenol (1.28 g, 5.80 mmol), 2-(2-azidoethoxy)ethyl *p*-toluenesulfonate (1.83 g, 6.38 mmol), and K<sub>2</sub>CO<sub>3</sub> (2.40 g, 17.4 mmol) in DMF (20 mL) was stirred at 80 °C for 20 h. The reaction mixture was then poured into ethyl acetate (100 mL) and washed with saturated aq. NH<sub>4</sub>Cl (4 × 50 mL) and saturated aq. NaCl (200 mL). The organic layer was separated, dried over MgSO<sub>4</sub>, filtered and the solvent was evaporated under reduced pressure. The crude product was purified by flash column chromatography on silica gel (eluent: gradient from hexane/ethyl acetate = 19:1 v/v to hexane/ethyl acetate = 4:1 v/v) to afford compound **1** (1.80 g, 5.40 mmol, 93%) as a colorless liquid.

<sup>1</sup>H NMR (400 MHz, CDCl<sub>3</sub>): δ = 7.55 (d, *J* = 9.2 Hz, 2H), 6.71 (d, *J* = 8.8 Hz, 2H), 4.12–4.09 (m, 2H), 3.87–3.85 (m, 2H), 3.74 (t, *J* = 5.2 Hz, 2H), 3.42 (t, *J* = 5.2 Hz, 2H). <sup>13</sup>C NMR (100 MHz, CDCl<sub>3</sub>): δ = 158.7, 138.3, 117.2, 83.2, 70.4, 69.8, 67.6, 50.8. HRMS (ESI) *m/z*: [M+Na]<sup>+</sup> Calcd for C<sub>10</sub>H<sub>12</sub>IN<sub>3</sub>NaO<sub>2</sub> 355.9866; Found 355.9874.

**Compound 2.** To a mixture of compound **1** (1.80 g, 5.40 mmol), 5,12-bis(triisopropylsilylethynyl)tetracene (1.45 g, 2.46 mmol), and triethylamine (20 mL) in THF (20 mL), a THF solution of tetrabutylammonium fluoride (ca. 1 mol/L, 6.15 mL, 6.15 mmol) was added and stirred under nitrogen atmosphere for 5 min. Then, Pd(PPh<sub>3</sub>)<sub>2</sub>Cl<sub>2</sub> (173 mg, 0.246 mmol) and CuI (46.8 mg, 0.246 mmol) were added and the reaction mixture was stirred under nitrogen atmosphere at 80 °C for 2 h. After cooling to r.t., the reaction mixture was poured into ethyl acetate (200 mL) and washed with 5% aq. HCl (2 × 100 mL), saturated aq. NaHCO<sub>3</sub> (100 mL), and saturated aq. NaCl (100 mL). The organic layer was separated, dried over MgSO<sub>4</sub>, filtered, and the solvent was evaporated under reduced pressure. The crude product was purified by flash column chromatography on silica gel (eluent: gradient from CH<sub>2</sub>Cl<sub>2</sub> to CH<sub>2</sub>Cl<sub>2</sub>/ethyl acetate = 19:1 v/v) and recycling GPC (eluent: chloroform) to afford compound **2** (950 mg, 1.38 mmol, 56%) as a purple solid.

<sup>1</sup>H NMR (400 MHz, CDCl<sub>3</sub>): δ = 9.25 (s, 2H), 8.66–8.63 (m, 2H), 8.11–8.08 (m, 2H), 7.76 (d, *J* = 8.8 Hz, 4H), 7.57–7.53 (m, 2H), 7.48–7.45 (m, 2H), 7.03 (d, *J* = 8.8 Hz, 4H),

4.23 (t,  $J = 4.8$  Hz, 4H), 3.92 (t,  $J = 4.8$  Hz, 4H), 3.78 (t,  $J = 5.2$  Hz, 4H), 3.45 (t,  $J = 5.2$  Hz, 4H).  $^{13}\text{C}$  NMR (100 MHz,  $\text{CDCl}_3$ ):  $\delta = 159.3, 133.4, 132.2, 132.2, 130.0, 128.7, 127.6, 126.6, 126.2, 126.0, 118.4, 116.1, 115.0, 103.4, 86.3, 70.5, 69.8, 67.7, 50.8$ . HRMS (ESI)  $m/z$ :  $[\text{M}+\text{Na}]^+$  Calcd for  $\text{C}_{42}\text{H}_{34}\text{N}_6\text{NaO}_4$  709.2534; Found 709.2520.

**Compound 3.** A mixture of 4-bromophenol (6.50 g, 37.5 mmol), 2-(2-chloroethoxy)ethanol (5.60 g, 45.0 mmol), and  $\text{K}_2\text{CO}_3$  (20.7 g, 150 mmol) in DMF (40 mL) was stirred at 110 °C for 24 h. After cooling to the r.t., most of the DMF was evaporated under reduced pressure. The reaction mixture was then poured into ethyl acetate (200 mL) and washed with saturated aq.  $\text{NH}_4\text{Cl}$  ( $4 \times 100$  mL) and saturated aq.  $\text{NaCl}$  (200 mL). The organic layer was separated, dried over  $\text{MgSO}_4$ , filtered and the solvent was evaporated under reduced pressure. The crude product was purified by flash column chromatography on silica gel (eluent: gradient from hexane/ethyl acetate = 9:1 v/v to hexane/ethyl acetate = 1:1 v/v) to afford compound **3** (6.48 g, 24.8 mmol, 66%) as a colorless liquid.

$^1\text{H}$  NMR (400 MHz,  $\text{CDCl}_3$ ):  $\delta = 7.37$  (d,  $J = 9.2$  Hz, 2H), 6.81 (d,  $J = 8.8$  Hz, 2H), 4.12–4.10 (m, 2H), 3.88–3.85 (m, 2H), 3.79–3.75 (m, 2H), 3.68–3.66 (m, 2H), 2.15 (t,  $J = 6.0$  Hz, 1H).  $^{13}\text{C}$  NMR (100 MHz,  $\text{CDCl}_3$ ):  $\delta = 157.7, 132.2, 116.4, 113.1, 72.7, 69.4, 67.5, 61.6$ . HRMS (ESI)  $m/z$ :  $[\text{M}+\text{Na}]^+$  Calcd for  $\text{C}_{10}\text{H}_{13}\text{BrNaO}_3$  282.9940; Found 282.9939.

**Compound 4.** A mixture of compound **3** (8.19 g, 31.4 mmol), trimethylsilylacetylene (15.4 g, 157 mmol),  $\text{Pd}(\text{PPh}_3)_4$  (1.81 g, 1.57 mmol),  $\text{CuI}$  (299 mg, 1.57 mmol), and diisopropylamine (20 mL) in THF (20 mL) was stirred under nitrogen atmosphere at 80 °C for 24 h. After cooling to r.t., the reaction mixture was poured into ethyl acetate (200 mL) and washed with 5% aq.  $\text{HCl}$  ( $2 \times 100$  mL), saturated aq.  $\text{NaHCO}_3$  (100 mL), and saturated aq.  $\text{NaCl}$  (100 mL). The organic layer was separated, dried over  $\text{MgSO}_4$ , filtered, and the solvent was evaporated under reduced pressure. The crude product was purified by flash column chromatography on silica gel (eluent: gradient from hexane to hexane/ethyl acetate = 17:3 v/v) to afford compound **4** (6.99 g, 25.1 mmol, 80%) as a brown liquid.

$^1\text{H}$  NMR (400 MHz,  $\text{CDCl}_3$ ):  $\delta = 7.40$  (d,  $J = 8.8$  Hz, 2H), 6.84 (d,  $J = 8.8$  Hz, 2H), 4.13 (t,  $J = 4.4$  Hz, 2H), 3.88–3.85 (m, 2H), 3.79–3.75 (m, 2H), 3.67 (t,  $J = 4.4$  Hz, 2H), 2.14 (t,  $J = 6.0$  Hz, 1H), 0.24 (s, 9H).  $^{13}\text{C}$  NMR (100 MHz,  $\text{CDCl}_3$ ):  $\delta = 158.8, 133.6, 115.6, 114.5, 105.1, 92.7, 72.7, 69.6, 67.4, 61.8, 0.1$ . HRMS (ESI)  $m/z$ :  $[\text{M}+\text{Na}]^+$  Calcd for  $\text{C}_{15}\text{H}_{22}\text{NaO}_3\text{Si}$  301.1230; Found 301.1224.

**Compound 5.** A THF solution of tetrabutylammonium fluoride (ca. 1 mol/L, 29.8 mL, 29.8 mmol) was added to a solution of compound **4** (6.90 g, 24.8 mmol) in THF (10 mL) and stirred at r.t. for 1 h. The reaction mixture was then poured into ethyl acetate (200 mL) and washed with water (100 mL), and washed with saturated aq. NaCl (2 × 100 mL). The organic layer was separated, dried over MgSO<sub>4</sub>, filtered, and the solvent was evaporated under reduced pressure. The crude product was purified by flash column chromatography on silica gel (eluent: gradient from hexane to hexane/ethyl acetate = 17:3 v/v) to afford compound **5** (2.58 g, 12.5 mmol, 51 %) as a brown liquid.

<sup>1</sup>H NMR (400 MHz, CDCl<sub>3</sub>): δ = 7.42 (d, *J* = 8.8 Hz, 2H), 6.85 (d, *J* = 9.2 Hz, 2H), 4.12–4.10 (m, 2H), 3.85–3.83 (m, 2H), 3.75 (t, *J* = 4.4 Hz, 2H), 3.65 (t, *J* = 4.4 Hz, 2H), 3.02 (s, 1H), 2.61 (br, 1H). <sup>13</sup>C NMR (100 MHz, CDCl<sub>3</sub>): δ = 159.0, 133.6, 114.6, 114.5, 83.6, 76.1, 72.7, 69.5, 67.4, 61.7. HRMS (ESI) *m/z*: [M+Na]<sup>+</sup> Calcd for C<sub>12</sub>H<sub>14</sub>NaO<sub>3</sub> 229.0835; Found 229.0829.

**Compound 6.** A THF solution (5 mL) of NaH (60% dispersion in paraffin liquid, 580 mg, 14.5 mmol) was added to a solution of compound **5** (2.49 g, 12.1 mmol) in THF (10 mL) at 0 °C. Then, 3-bromo-1-(triisopropylsilyl)-1-propyne (3.99 g, 14.5 mmol) was added to the mixture and stirred at r.t. for 8 h. After adding water (10 mL) dropwise to the reaction mixture, most of the THF was evaporated under reduced pressure. Ethyl acetate (100 mL) was added to the reaction mixture and washed with saturated aq. NaCl (100 mL). The organic layer was separated, dried over MgSO<sub>4</sub>, filtered and the solvent was evaporated under reduced pressure. The crude product was purified by flash column chromatography on silica gel (eluent: gradient from hexane to hexane/ethyl acetate = 4:1 v/v) to afford compound **6** (3.85 g, 9.61 mmol, 80%) as a colorless liquid.

<sup>1</sup>H NMR (400 MHz, CDCl<sub>3</sub>): δ = 7.41 (d, *J* = 8.8 Hz, 2H), 6.85 (d, *J* = 8.4 Hz, 2H), 4.26, (s, 2H), 4.14 (t, *J* = 4.8 Hz, 2H), 3.87 (t, *J* = 4.8 Hz, 2H), 3.76 (s, 4H), 3.00 (s, 1H), 1.08–1.05 (m, 21H). <sup>13</sup>C NMR (100 MHz, CDCl<sub>3</sub>): δ = 159.2, 133.6, 114.6, 114.3, 103.2, 87.8, 83.7, 76.0, 70.7, 69.6, 68.7, 67.4, 59.2, 18.6, 11.2. HRMS (ESI) *m/z*: [M+Na]<sup>+</sup> Calcd for C<sub>24</sub>H<sub>36</sub>NaO<sub>3</sub>Si 423.2326; Found 423.2336.

**Compound 7.** A hexane solution of *n*-butyllithium (ca. 1.6 mol/L, 6.00 mL, 9.61 mmol) was added dropwise to a solution of compound **6** (3.85 g, 9.61 mmol) in THF (40 mL) at –78 °C. The reaction mixture was allowed to warm to 0 °C and stirred for 40 min. The reaction mixture was then cooled to –78 °C, and 5,12-naphthacenequinone (1.13 g, 4.37 mmol) was added at r.t. and stirred under nitrogen atmosphere for 12 h. Then, saturated aq. NH<sub>4</sub>Cl (10 mL) was added to the reaction mixture and stirred for 20 min. The reaction

mixture was extracted with ethyl acetate (100 mL), and the organic layer was washed with saturated aq.  $\text{NH}_4\text{Cl}$  ( $2 \times 100$  mL) and saturated aq.  $\text{NaCl}$  (100 mL). The organic layer was separated, dried over  $\text{MgSO}_4$ , filtered and the solvent was evaporated under reduced pressure. To the completely dried crude product, THF (20 mL) and  $\text{SnCl}_2$  (2.07 g, 10.9 mmol) in 10% aq.  $\text{HCl}$  (10 mL) was added. The reaction mixture was stirred under dark and nitrogen atmosphere at r.t. for 2 h. The reaction mixture was extracted with ethyl acetate (100 mL), washed with water ( $2 \times 100$  mL) and saturated aq.  $\text{NaCl}$  (100 mL). The organic layer was separated, dried over  $\text{MgSO}_4$ , filtered and the solvent was evaporated under reduced pressure. The crude product was purified by flash column chromatography on silica gel (eluent: gradient from hexane to hexane/ethyl acetate = 4:1 v/v) to afford compound **7** (970 mg, 0.946 mmol, 22%) as a purple solid.

$^1\text{H}$  NMR (400 MHz,  $\text{CDCl}_3$ ):  $\delta$  = 9.22 (s, 2H), 8.64–8.61 (m, 2H), 8.09–8.06 (m, 2H), 7.75 (d,  $J$  = 8.8 Hz, 4H), 7.54–7.51 (m, 2H), 7.47–7.44 (m, 2H), 7.02 (d,  $J$  = 8.8 Hz, 4H), 4.29 (s, 4H), 4.21 (t,  $J$  = 4.8 Hz, 4H), 3.92 (t,  $J$  = 4.8 Hz, 4H), 3.79 (s, 8H), 1.10–1.05 (m, 42H).  $^{13}\text{C}$  NMR (100 MHz,  $\text{CDCl}_3$ ):  $\delta$  = 159.3, 133.3, 132.2, 132.1, 130.0, 128.7, 127.5, 126.5, 126.2, 126.0, 118.3, 116.0, 115.0, 103.5, 103.2, 87.9, 86.2, 70.8, 69.7, 68.8, 67.6, 59.4, 18.7, 11.3. HRMS (ESI)  $m/z$ :  $[\text{M}+\text{Na}]^+$  Calcd for  $\text{C}_{66}\text{H}_{80}\text{NaO}_6\text{Si}_2$  1047.5400; Found 1047.5386.

**Compound 8.** A THF solution of tetrabutylammonium fluoride (ca. 1 mol/L, 0.70 mL, 0.70 mmol) was added to a solution of compound **7** (270 mg, 0.263 mmol) in THF (20 mL) and stirred at r.t. for 1 h. Ethyl acetate (100 mL) was added to the reaction mixture, and the organic layer was washed with water (100 mL) and saturated aq.  $\text{NaCl}$  (100 mL). The organic layer was separated, dried over  $\text{MgSO}_4$ , filtered, and the solvent was evaporated under reduced pressure. The crude product was purified by flash column chromatography on silica gel (eluent: gradient from hexane/ethyl acetate = 3:2 v/v to hexane/ethyl acetate = 11:9 v/v) to afford compound **8** (140 mg, 0.196 mmol, 75 %) as a purple solid.

$^1\text{H}$  NMR (400 MHz,  $\text{CDCl}_3$ ):  $\delta$  = 9.22 (s, 2H), 8.64–8.61 (m, 2H), 8.09–8.06 (m, 2H), 7.75 (d,  $J$  = 8.8 Hz, 4H), 7.55–7.52 (m, 2H), 7.47–7.44 (m, 2H), 7.02 (d,  $J$  = 8.8 Hz, 4H), 4.24 (d,  $J$  = 2.4 Hz, 4H), 4.22 (t,  $J$  = 4.8 Hz, 4H), 3.91 (t,  $J$  = 4.8 Hz, 4H), 3.81–3.75 (m, 8H), 2.46 (t,  $J$  = 2.4 Hz, 2H).  $^{13}\text{C}$  NMR (100 MHz,  $\text{CDCl}_3$ ):  $\delta$  = 159.3, 133.3, 132.2, 132.1, 130.0, 128.7, 127.5, 126.5, 126.2, 126.0, 118.3, 116.0, 115.0, 103.5, 86.2, 79.7, 74.8, 70.8, 69.8, 69.3, 67.6, 58.6. HRMS (ESI)  $m/z$ :  $[\text{M}+\text{Na}]^+$  Calcd for  $\text{C}_{48}\text{H}_{40}\text{NaO}_6$  735.2717; Found 735.2723.



**Compound (Tet)<sub>2</sub>-CyO<sub>10</sub>.** A mixture of compound **8** (107 mg, 0.150 mmol), compound **2** (103 mg, 0.151 mmol), CuI (143 mg, 0.751 mmol), and *N,N*-diisopropylethylamine (130 mL) in CHCl<sub>3</sub> (300 mL) was stirred at 60 °C for 24 h. After cooling to r.t., the reaction mixture was washed with 5% aq. HCl (3 × 100 mL), saturated aq. NaHCO<sub>3</sub> (100 mL), and saturated aq. NaCl (100 mL). The organic layer was separated, dried over MgSO<sub>4</sub>, filtered, and the solvent was evaporated under reduced pressure. The crude product was purified by flash column chromatography on silica gel (eluent: gradient from CH<sub>2</sub>Cl<sub>2</sub> to CH<sub>2</sub>Cl<sub>2</sub>/acetone = 3:7 v/v) and further precipitation with chloroform and methanol to afford compound **(Tet)<sub>2</sub>-CyO<sub>10</sub>** (51.0 mg, 3.64 × 10<sup>-2</sup> mmol, 24%) as a purple solid.

<sup>1</sup>H NMR (400 MHz, CDCl<sub>3</sub>): δ = 8.68 (s, 4H), 8.20–8.12 (m, 4H), 7.86 (s, 2H), 7.81–7.74 (m, 4H), 7.55–7.48 (m, 8H), 7.35–7.29 (m, 4H), 7.26–7.21 (m, 4H), 6.89–6.80 (m, 8H), 4.77 (s, 4H), 4.59 (t, *J* = 4.8 Hz, 4H), 4.13 (t, *J* = 4.8 Hz, 4H), 4.08–4.03 (m, 4H), 3.93 (t, *J* = 4.8 Hz, 4H), 3.90–3.85 (m, 4H), 3.81–3.75 (m, 12H). <sup>13</sup>C NMR (100 MHz, CDCl<sub>3</sub>): δ = 159.0, 158.7, 145.5, 133.3, 133.2, 131.7, 131.6, 129.3, 128.7, 127.1, 126.0, 125.8, 125.5, 124.1, 117.8, 116.5, 116.3, 114.7, 114.6, 103.0, 102.9, 86.5, 86.4, 71.1, 70.0, 69.9, 69.9, 69.8, 67.7, 67.3, 65.1, 50.4. HRMS (ESI) *m/z*: [M+Na]<sup>+</sup> Calcd for C<sub>90</sub>H<sub>74</sub>N<sub>6</sub>NaO<sub>10</sub> 1421.5359; Found 1421.5321.

## Scheme S2 Synthesis of (Tet)<sub>2</sub>-CyO<sub>12</sub>

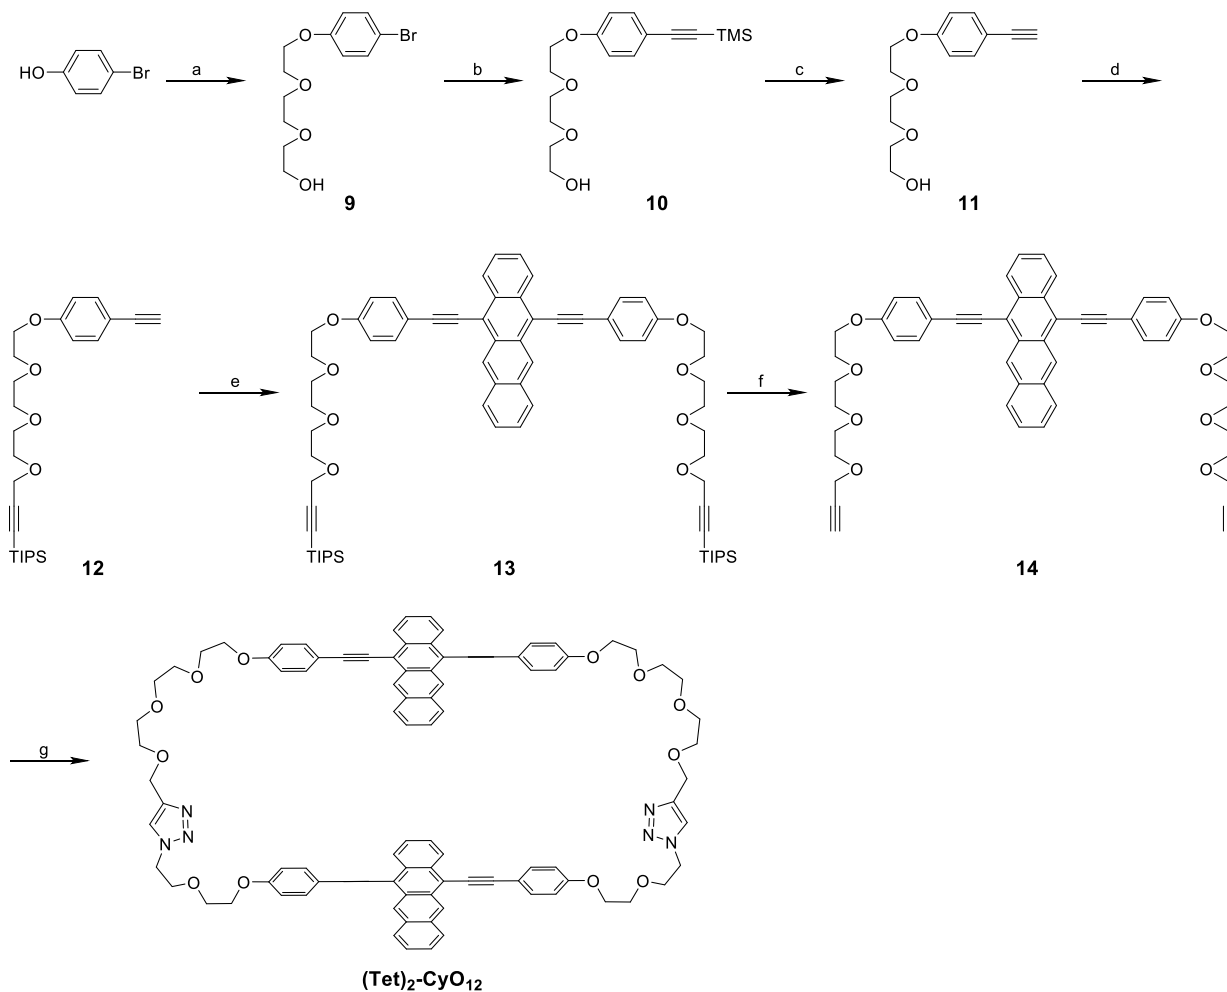

Conditions: (a) triethylene glycol *p*-toluenesulfonate, K<sub>2</sub>CO<sub>3</sub>, DMF, 110 °C, 20 h; (b) trimethylsilylacetylene, Pd(PPh<sub>3</sub>)<sub>2</sub>Cl<sub>2</sub>, CuI, diisopropylamine, THF, 80 °C, 24 h; (c) tetrabutylammonium fluoride, THF, r.t., 1 h; (d) 3-bromo-1-(triisopropylsilyl)-1-propyne, NaH, THF, 0 °C → r.t., 8 h; (e) i) *n*-butyllithium, THF, -78 °C → 0 °C, 40 min, ii) 5,12-naphthacenequinone, THF, r.t., 12 h, iii) H<sup>+</sup>, iv) 10% aq. HCl, SnCl<sub>2</sub>, r.t., 2 h; (f) tetrabutylammonium fluoride, THF, r.t., 1 h; (g) compound **2**, CuI, *N,N*-diisopropylethylamine, CHCl<sub>3</sub>, 55 °C, 12 h.

**Compound 9.** A mixture of 4-bromophenol (6.65 g, 38.5 mmol), triethylene glycol *p*-toluenesulfonate (12.9 g, 42.3 mmol), and K<sub>2</sub>CO<sub>3</sub> (26.6 g, 193 mmol) in DMF (40 mL) was stirred at 110 °C for 20 h. After cooling to r.t., the reaction mixture was poured into

ethyl acetate (200 mL) and washed with saturated aq.  $\text{NH}_4\text{Cl}$  ( $4 \times 100$  mL) and saturated aq.  $\text{NaCl}$  (200 mL). The organic layer was separated, dried over  $\text{MgSO}_4$ , filtered and the solvent was evaporated under reduced pressure. The crude product was purified by flash column chromatography on silica gel (eluent: gradient from hexane/ethyl acetate = 9:1 v/v to hexane/ethyl acetate = 2:3 v/v) to afford compound **9** (8.36 g, 27.4 mmol, 71%) as a colorless liquid.

$^1\text{H}$  NMR (400 MHz,  $\text{CDCl}_3$ ):  $\delta$  = 7.36 (d,  $J$  = 9.2 Hz, 2H), 6.80 (d,  $J$  = 8.8 Hz, 2H), 4.11–4.08 (m, 2H), 3.86–3.83 (m, 2H), 3.74–3.67 (m, 6H), 3.62–3.59 (m, 2H), 2.61 (br, 1H).  $^{13}\text{C}$  NMR (100 MHz,  $\text{CDCl}_3$ ):  $\delta$  = 157.9, 132.3, 116.5, 113.1, 72.6, 70.9, 70.4, 69.7, 67.6, 61.8. HRMS (ESI)  $m/z$ :  $[\text{M}+\text{Na}]^+$  Calcd for  $\text{C}_{12}\text{H}_{17}\text{BrNaO}_4$  327.0202; Found 327.0196.

**Compound 10.** A mixture of compound **9** (8.36 g, 27.4 mmol), trimethylsilylacetylene (13.5 g, 137 mmol),  $\text{Pd}(\text{PPh}_3)_2\text{Cl}_2$  (962 mg, 1.37 mmol),  $\text{CuI}$  (261 mg, 1.37 mmol), and diisopropylamine (20 mL) in THF (20 mL) was stirred under nitrogen atmosphere at 80 °C for 24 h. After cooling to r.t., the reaction mixture was poured into ethyl acetate (200 mL) and washed with 5% aq.  $\text{HCl}$  ( $2 \times 100$  mL), saturated aq.  $\text{NaHCO}_3$  (100 mL), and saturated aq.  $\text{NaCl}$  (100 mL). The organic layer was separated, dried over  $\text{MgSO}_4$ , filtered, and the solvent was evaporated under reduced pressure. The crude product was purified by flash column chromatography on silica gel (eluent: gradient from hexane/ethyl acetate = 9:1 v/v to hexane/ethyl acetate = 2:3 v/v) to afford compound **10** (5.16 g, 16.0 mmol, 58%) as a brown liquid.

$^1\text{H}$  NMR (400 MHz,  $\text{CDCl}_3$ ):  $\delta$  = 7.39 (d,  $J$  = 8.8 Hz, 2H), 6.83 (d,  $J$  = 8.8 Hz, 2H), 4.15–4.11 (m, 2H), 3.88–3.85 (m, 2H), 3.76–3.69 (m, 6H), 3.63–3.61 (m, 2H), 2.39 (t,  $J$  = 6.0 Hz, 1H), 0.24 (s, 9H).  $^{13}\text{C}$  NMR (100 MHz,  $\text{CDCl}_3$ ):  $\delta$  = 159.0, 133.6, 115.6, 114.5, 105.2, 92.6, 72.6, 71.0, 70.5, 69.7, 67.4, 61.9, 0.2. HRMS (ESI)  $m/z$ :  $[\text{M}+\text{Na}]^+$  Calcd for  $\text{C}_{17}\text{H}_{26}\text{NaO}_4\text{Si}$  345.1493; Found 345.1485.

**Compound 11.** A THF solution of tetrabutylammonium fluoride (ca. 1 mol/L, 27.3 mL, 27.3 mmol) was added to a solution of compound **10** (7.35 g, 22.8 mmol) in THF (10 mL) and stirred at r.t. for 1 h. Ethyl acetate (100 mL) was added to the reaction mixture, and the mixture was then washed with water (100 mL) and saturated aq.  $\text{NaCl}$  ( $2 \times 100$  mL). The organic layer was separated, dried over  $\text{MgSO}_4$ , filtered, and the solvent was evaporated under reduced pressure. The crude product was purified by flash column chromatography on silica gel (eluent: gradient from hexane/ethyl acetate = 9:1 v/v to hexane/ethyl acetate = 2:3 v/v) to afford compound **11** (5.05 g, 20.2 mmol, 89 %) as a brown liquid.

<sup>1</sup>H NMR (400 MHz, CDCl<sub>3</sub>):  $\delta$  = 7.41 (d,  $J$  = 8.8 Hz, 2H), 6.86 (d,  $J$  = 8.8 Hz, 2H), 4.15–4.11 (m, 2H), 3.87–3.84 (m, 2H), 3.75–3.67 (m, 6H), 3.63–3.59 (m, 2H), 3.01, (s, 1H), 2.66, (br, 1H). <sup>13</sup>C NMR (100 MHz, CDCl<sub>3</sub>):  $\delta$  = 159.1, 133.6, 114.6, 114.4, 83.7, 76.0, 72.6, 70.9, 70.4, 69.6, 67.4, 61.8. HRMS (ESI)  $m/z$ : [M+Na]<sup>+</sup> Calcd for C<sub>14</sub>H<sub>18</sub>NaO<sub>4</sub> 273.1097; Found 273.1094.

**Compound 12.** A THF solution (10 mL) of NaH (60% dispersion in paraffin liquid, 969 mg, 24.2 mmol) was added to a solution of compound **11** (5.05 g, 20.2 mmol) in THF (20 mL) at 0 °C. Then, 3-bromo-1-(triisopropylsilyl)-1-propyne (6.67 g, 24.2 mmol) was added to the mixture and stirred at r.t. for 8 h. After adding water (15 mL) dropwise to the reaction mixture, most of the THF was evaporated under reduced pressure. Ethyl acetate (100 mL) was added to the reaction mixture, and the mixture was washed with water (100 mL) and saturated aq. NaCl (100 mL). The organic layer was separated, dried over MgSO<sub>4</sub>, filtered and the solvent was evaporated under reduced pressure. The crude product was purified by flash column chromatography on silica gel (eluent: gradient from hexane to hexane/ethyl acetate = 4:1 v/v) to afford compound **12** (5.39 g, 12.0 mmol, 60%) as a colorless liquid.

<sup>1</sup>H NMR (400 MHz, CDCl<sub>3</sub>):  $\delta$  = 7.41 (d,  $J$  = 8.8 Hz, 2H), 6.85 (d,  $J$  = 8.8 Hz, 2H), 4.24 (s, 2H), 4.12 (t,  $J$  = 4.8 Hz, 2H), 3.85 (t,  $J$  = 4.8 Hz, 2H), 3.74–3.67 (m, 8H), 3.00 (s, 1H), 1.09–1.04 (m, 21H). <sup>13</sup>C NMR (100 MHz, CDCl<sub>3</sub>):  $\delta$  = 159.2, 133.6, 114.6, 114.3, 103.3, 87.7, 83.7, 75.9, 70.9, 70.7, 70.5, 69.7, 68.7, 67.5, 59.2, 18.6, 11.2. HRMS (ESI)  $m/z$ : [M+Na]<sup>+</sup> Calcd for C<sub>26</sub>H<sub>40</sub>NaO<sub>4</sub>Si 467.2588; Found 467.2598.

**Compound 13.** A hexane solution of *n*-butyllithium (ca. 1.6 mol/L, 2.1 mL, 3.38 mmol) was added dropwise to a solution of compound **12** (1.45 g, 3.23 mmol) in THF (40 mL) at –78 °C. The reaction mixture was allowed to warm to 0 °C and stirred for 40 min. Then, the reaction mixture was cooled to –78 °C and 5,12-naphthacenequinone (379 mg, 1.47 mmol) was added at r.t. and stirred under nitrogen atmosphere for 12 h. Saturated aq. NH<sub>4</sub>Cl (10 mL) was added to the reaction mixture and stirred for 20 min. The reaction mixture was extracted with ethyl acetate (100 mL), and washed with saturated aq. NH<sub>4</sub>Cl (2 × 100 mL) and saturated aq. NaCl (100 mL). The organic layer was separated, dried over MgSO<sub>4</sub>, filtered and the solvent was evaporated under reduced pressure. To the completely dried crude product, THF (20 mL) and SnCl<sub>2</sub> (613 mg, 3.23 mmol) in 10% aq. HCl (10 mL) was added. The reaction mixture was stirred under dark and nitrogen atmosphere at r.t. for 2 h. The reaction mixture was extracted with ethyl acetate (100 mL), washed with water (2 × 100 mL) and saturated aq. NaCl (100 mL). The organic layer was

separated, dried over MgSO<sub>4</sub>, filtered and the solvent was evaporated under reduced pressure. The crude product was purified by flash column chromatography on silica gel (eluent: gradient from hexane to hexane/ethyl acetate = 3:1 v/v) to afford compound **13** (230 mg, 0.207 mmol, 14%) as a purple solid.

<sup>1</sup>H NMR (400 MHz, CDCl<sub>3</sub>): δ = 9.24 (s, 2H), 8.65–8.62 (m, 2H), 8.10–8.07 (m, 2H), 7.75 (d, *J* = 8.8 Hz, 4H), 7.55–7.52 (m, 2H), 7.47–7.44 (m, 2H), 7.02 (d, *J* = 8.8 Hz, 4H), 4.27 (s, 4H), 4.21 (t, *J* = 4.8 Hz, 4H), 3.91 (t, *J* = 4.8 Hz, 4H), 3.79–3.70 (m, 16H), 1.09–1.04 (m, 42H). <sup>13</sup>C NMR (100 MHz, CDCl<sub>3</sub>): δ = 159.4, 133.3, 132.2, 132.1, 130.0, 128.7, 127.6, 126.5, 126.2, 126.0, 118.4, 116.0, 115.0, 103.5, 103.3, 87.8, 86.2, 71.0, 70.8, 70.6, 69.8, 68.8, 67.7, 59.3, 18.7, 11.2. HRMS (ESI) *m/z*: [M+Na]<sup>+</sup> Calcd for C<sub>70</sub>H<sub>88</sub>NaO<sub>8</sub>Si<sub>2</sub> 1135.5910; Found 1135.5913.

**Compound 14.** A THF solution of tetrabutylammonium fluoride (ca. 1 mol/L, 0.593 mL, 0.593 mmol) was added to a solution of compound **13** (229 mg, 0.206 mmol) in THF (20 mL) and stirred at r.t. for 1 h. The reaction mixture was then extracted with CH<sub>2</sub>Cl<sub>2</sub> (100 mL), washed with water (100 mL), and washed with saturated aq. NaCl (100 mL). The organic layer was separated, dried over MgSO<sub>4</sub>, filtered, and the solvent was evaporated under reduced pressure. The crude product was purified by flash column chromatography on silica gel (eluent: gradient from hexane/ethyl acetate = 3:1 v/v to hexane/ethyl acetate = 2:3 v/v) and recycling GPC (eluent: chloroform) to afford compound **14** (162 mg, 0.202 mmol, 98 %) as a purple solid.

<sup>1</sup>H NMR (400 MHz, CDCl<sub>3</sub>): δ = 9.24 (s, 2H), 8.66–8.63 (m, 2H), 8.11–8.07 (m, 2H), 7.76 (d, *J* = 8.8 Hz, 4H), 7.57–7.52 (m, 2H), 7.48–7.44 (m, 2H), 7.03 (d, *J* = 8.8 Hz, 4H), 4.24–4.19 (m, 8H), 3.91 (t, *J* = 4.8 Hz, 4H), 3.79–3.76 (m, 4H), 3.74–3.70 (m, 12H), 2.44 (t, *J* = 2.4 Hz, 2H). <sup>13</sup>C NMR (100 MHz, CDCl<sub>3</sub>): δ = 159.4, 133.3, 132.2, 132.2, 130.0, 128.7, 127.6, 126.6, 126.2, 126.0, 118.4, 116.0, 115.0, 103.5, 86.2, 79.8, 74.7, 71.0, 70.8, 70.6, 69.8, 69.2, 67.7, 58.6. HRMS (ESI) *m/z*: [M+Na]<sup>+</sup> Calcd for C<sub>52</sub>H<sub>48</sub>NaO<sub>8</sub> 823.3241; Found 823.3220.

**Compound (Tet)<sub>2</sub>-CyO<sub>12</sub>.** A mixture of compound **14** (140 mg, 0.191 mmol), compound **2** (120 mg, 0.191 mmol), CuI (182 mg, 0.954 mmol), and *N,N*-diisopropylethylamine (130 mL) in CHCl<sub>3</sub> (300 mL) was stirred at 55 °C for 12 h. After cooling to r.t., the reaction mixture was washed with 5% aq. HCl (3 × 100 mL), saturated aq. NaHCO<sub>3</sub> (100 mL), and saturated aq. NaCl (100 mL). The organic layer was separated, dried over MgSO<sub>4</sub>, filtered, and the solvent was evaporated under reduced pressure. The crude product was purified by flash column chromatography on silica gel (eluent: gradient from

CH<sub>2</sub>Cl<sub>2</sub> to CH<sub>2</sub>Cl<sub>2</sub>/acetone = 1:4 v/v) to afford compound **(Tet)<sub>2</sub>-CyO<sub>12</sub>** (29.5 mg, 1.98 × 10<sup>-2</sup> mmol, 10%) as a purple solid.

<sup>1</sup>H NMR (400 MHz, CDCl<sub>3</sub>): δ = 8.81 (s, 4H), 8.32–8.22 (m, 4H), 7.85–7.83 (m, 6H), 7.56–7.47 (m, 8H), 7.37–7.29 (m, 8H), 6.82–6.76 (m, 8H), 4.74 (s, 4H), 4.57 (t, *J* = 4.8 Hz, 4H), 4.10–4.05 (m, 4H), 4.03–3.99 (m, 4H), 3.92 (t, *J* = 4.8 Hz, 4H), 3.87–3.82 (m, 4H), 3.80–3.67 (m, 20H). <sup>13</sup>C NMR (100 MHz, CDCl<sub>3</sub>): δ = 159.0, 158.7, 145.4, 133.2, 133.1, 131.8, 131.7, 129.5, 128.6, 127.2, 126.1, 125.8, 125.6, 124.0, 117.9, 116.3, 116.1, 114.7, 114.6, 103.2, 103.1, 86.4, 86.4, 71.0, 70.8, 69.9, 69.9, 69.8, 69.7, 67.6, 67.3, 65.0, 50.4. HRMS (ESI) *m/z*: [M+Na]<sup>+</sup> Calcd for C<sub>94</sub>H<sub>82</sub>N<sub>6</sub>NaO<sub>12</sub> 1509.5883; Found 1509.5878.

### Scheme S3 Synthesis of Tet-ref

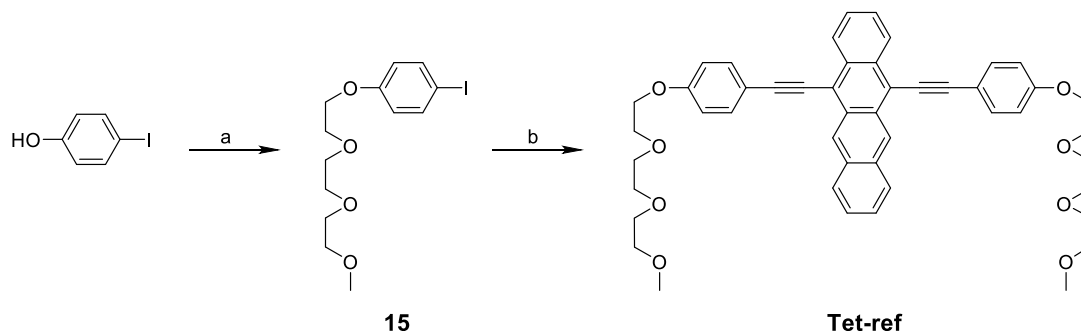

(a) 2-[2-(2-methoxyethoxy)ethoxy]ethyl *p*-toluenesulfonate, K<sub>2</sub>CO<sub>3</sub>, DMF, 80 °C, 14 h;  
(b) 5,12-bis[(triisopropylsilyl)ethynyl]tetracene, tetrabutylammonium fluoride, Pd(PPh<sub>3</sub>)<sub>2</sub>Cl<sub>2</sub>, CuI, diisopropylamine, THF, 80 °C, 2 h.

**Compound 15.** A mixture of 4-iodophenol (1.10 g, 5.00 mmol), 2-[2-(2-methoxyethoxy)ethoxy]ethyl *p*-toluenesulfonate (1.91 g, 6.00 mmol), and K<sub>2</sub>CO<sub>3</sub> (2.50 g, 15.0 mmol) in DMF (30 mL) was stirred at 80 °C for 14 h. After cooling to r.t., most of the DMF was evaporated under reduced pressure. The reaction mixture was then poured into ethyl acetate (200 mL) and washed with saturated aq. NH<sub>4</sub>Cl (4 × 100 mL) and saturated aq. NaCl (200 mL). The organic layer was separated, dried over MgSO<sub>4</sub>, filtered and the solvent was evaporated under reduced pressure. The crude product was purified by flash column chromatography on silica gel (eluent: gradient from hexane/ethyl acetate = 9:1 v/v to hexane/ethyl acetate = 1:1 v/v) to afford compound **15** (1.63 g, 4.45 mmol, 89%) as a colorless liquid.

<sup>1</sup>H NMR (400 MHz, CDCl<sub>3</sub>): δ = 7.54 (d, *J* = 9.2 Hz, 2H), 6.70 (d, *J* = 8.8 Hz, 2H), 4.12–4.06 (m, 2H), 3.87–3.82 (m, 2H), 3.75–3.71 (m, 2H), 3.70–3.63 (m, 4H), 3.57–3.53 (m, 2H), 3.38 (s, 3H). <sup>13</sup>C NMR (100 MHz, CDCl<sub>3</sub>): δ = 158.5, 138.0, 116.9, 82.8, 71.8, 70.7, 70.5, 70.4, 69.5, 67.4, 58.9. HRMS (ESI) *m/z*: [M+Na]<sup>+</sup> Calcd for C<sub>13</sub>H<sub>19</sub>INaO<sub>4</sub> 389.0220; Found 389.0217.

**Compound Tet-ref.** To a mixture of compound **15** (466 mg, 1.27 mmol), 5,12-bis[(triisopropylsilyl)ethynyl]tetracene (300 mg, 0.509 mmol), and diisopropylamine (20 mL) in THF (20 mL), A THF solution of tetrabutylammonium fluoride (ca. 1 mol/L, 1.27 mL, 1.27 mmol) was added and stirred under nitrogen atmosphere for 5 min. Then the catalysts Pd(PPh<sub>3</sub>)<sub>2</sub>Cl<sub>2</sub> (35.8 mg, 5.09 × 10<sup>-2</sup> mmol) and CuI (10.0 mg, 5.09 × 10<sup>-2</sup> mmol) were added and the reaction mixture was stirred under nitrogen atmosphere at 80 °C for 2 h. After cooling to r.t., the reaction mixture was poured into ethyl acetate (200 mL) and washed with 5% aq. HCl (2 × 100 mL), saturated aq. NaHCO<sub>3</sub> (100 mL), and saturated

aq. NaCl (100 mL). The organic layer was separated, dried over MgSO<sub>4</sub>, filtered, and the solvent was evaporated under reduced pressure. The crude product was purified by flash column chromatography on silica gel (eluent: gradient from hexane/ethyl acetate = 3:2 v/v to ethyl acetate) to afford compound **Tet-ref** (210 mg, 0.279 mmol, 55%) as a purple solid.

<sup>1</sup>H NMR (400 MHz, CDCl<sub>3</sub>):  $\delta$  = 9.23 (s, 2H), 8.64–8.62 (m, 2H), 8.09–8.07 (m, 2H), 7.75 (d,  $J$  = 8.8 Hz, 4H), 7.55–7.52 (m, 2H), 7.47–7.45 (m, 2H), 7.02 (d,  $J$  = 9.2 Hz, 4H), 4.21 (t,  $J$  = 4.8 Hz, 4H), 3.91 (t,  $J$  = 4.8 Hz, 4H), 3.79–3.76 (m, 4H), 3.73–3.65 (m, 8H), 3.59–3.56 (m, 4H), 3.40 (s, 6H). <sup>13</sup>C NMR (100 MHz, CDCl<sub>3</sub>):  $\delta$  = 159.3, 133.3, 132.1, 132.1, 129.9, 128.7, 127.5, 126.5, 126.1, 125.9, 118.3, 116.0, 115.0, 103.4, 86.2, 72.0, 71.0, 70.8, 70.7, 69.7, 67.6, 59.2. HRMS (ESI)  $m/z$ : [M+Na]<sup>+</sup> Calcd for C<sub>48</sub>H<sub>48</sub>NaO<sub>8</sub> 775.3241; Found 775.3228.



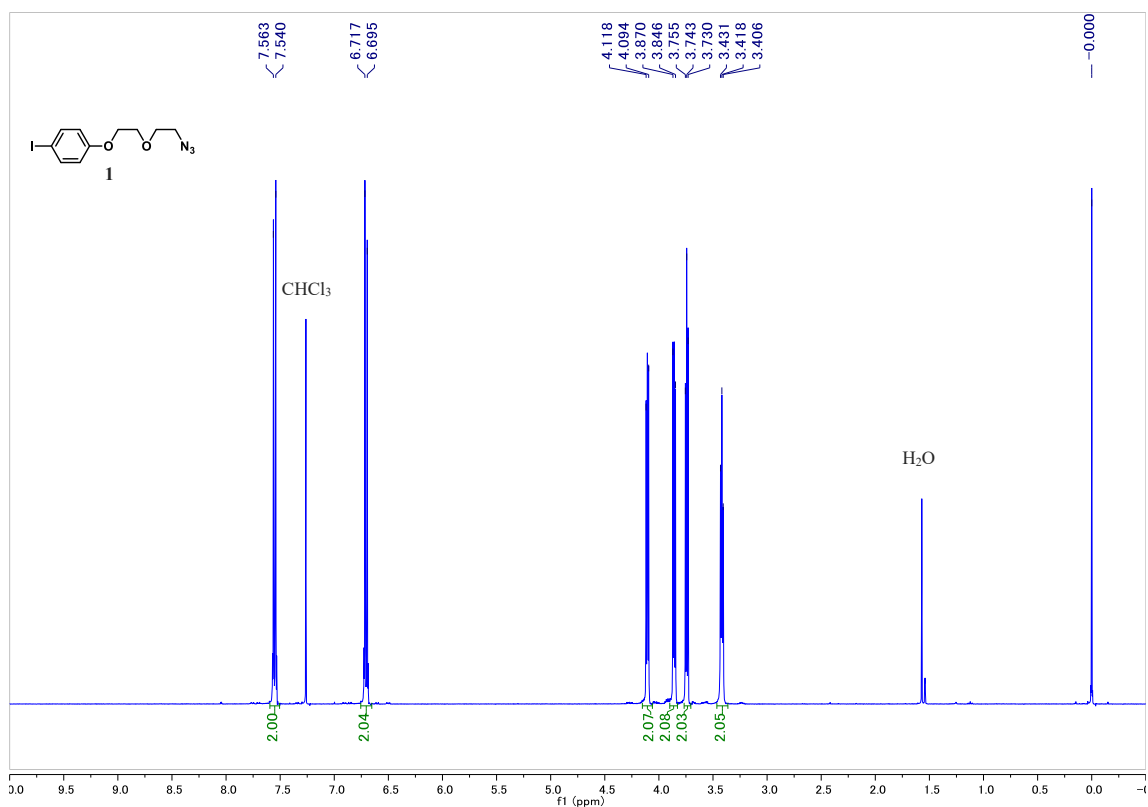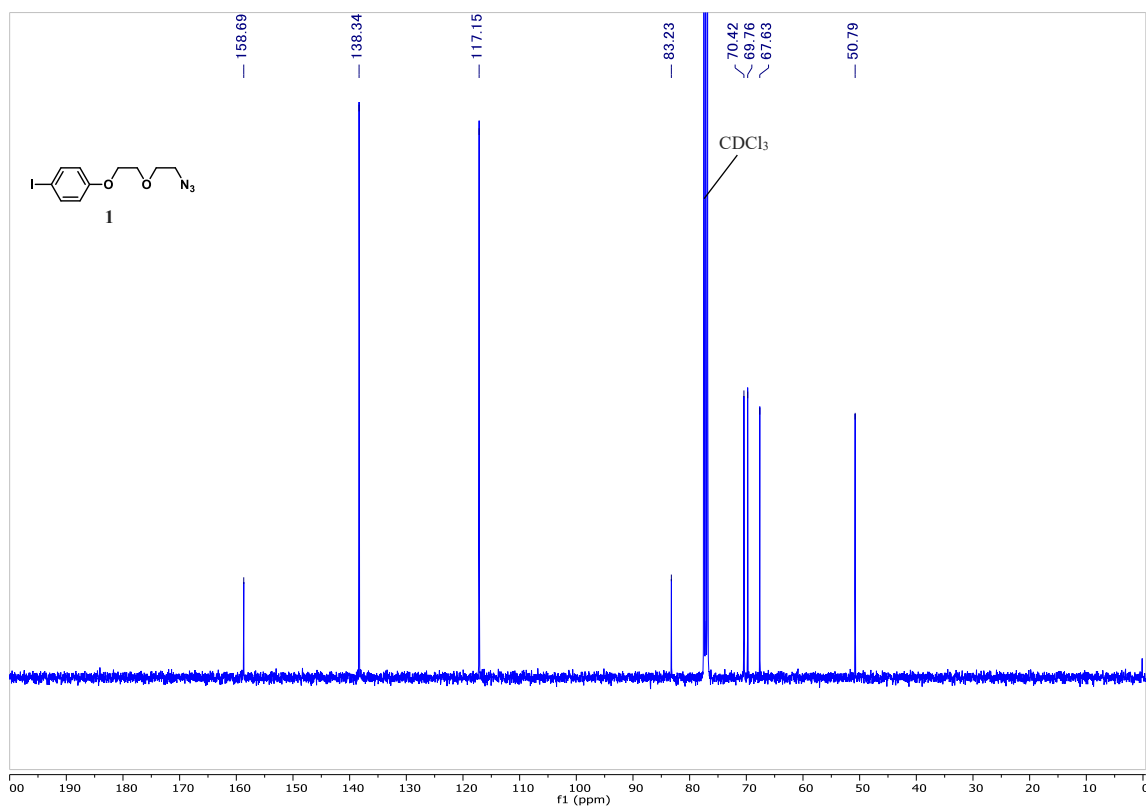

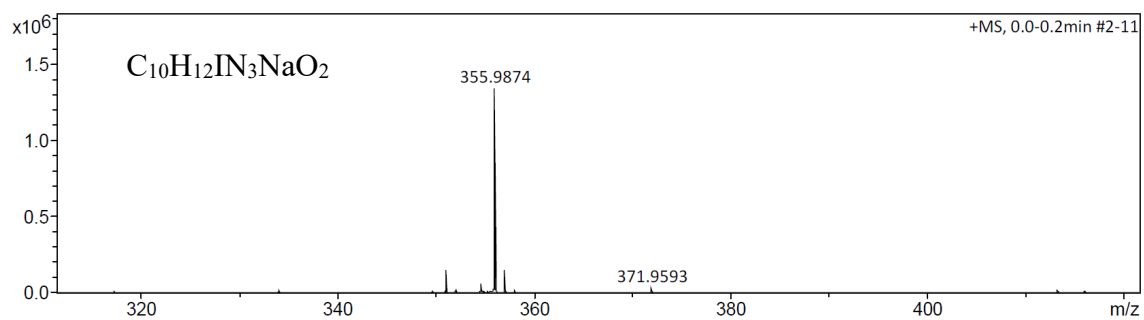

**Fig. S3** High resolution ESI-TOF-MS spectrum of compound 1.

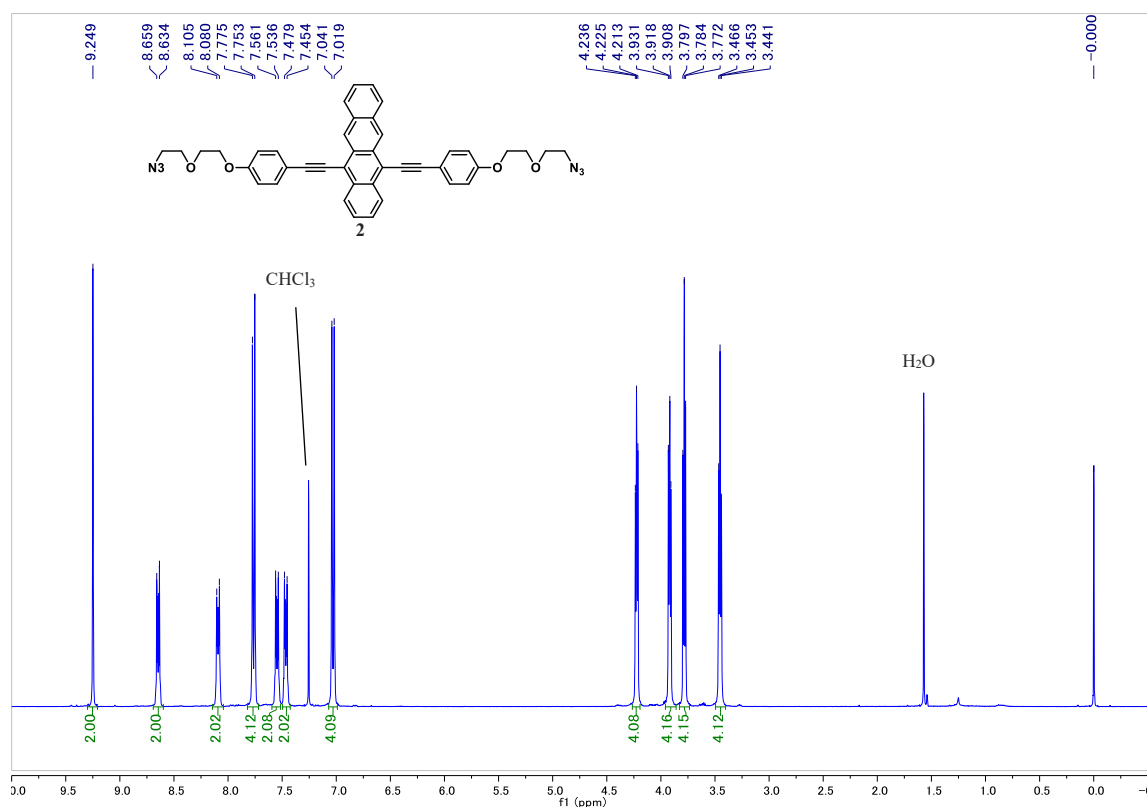

**Fig. S4**  $^1H$  NMR (400 MHz,  $CDCl_3$ ) spectrum of compound 2.

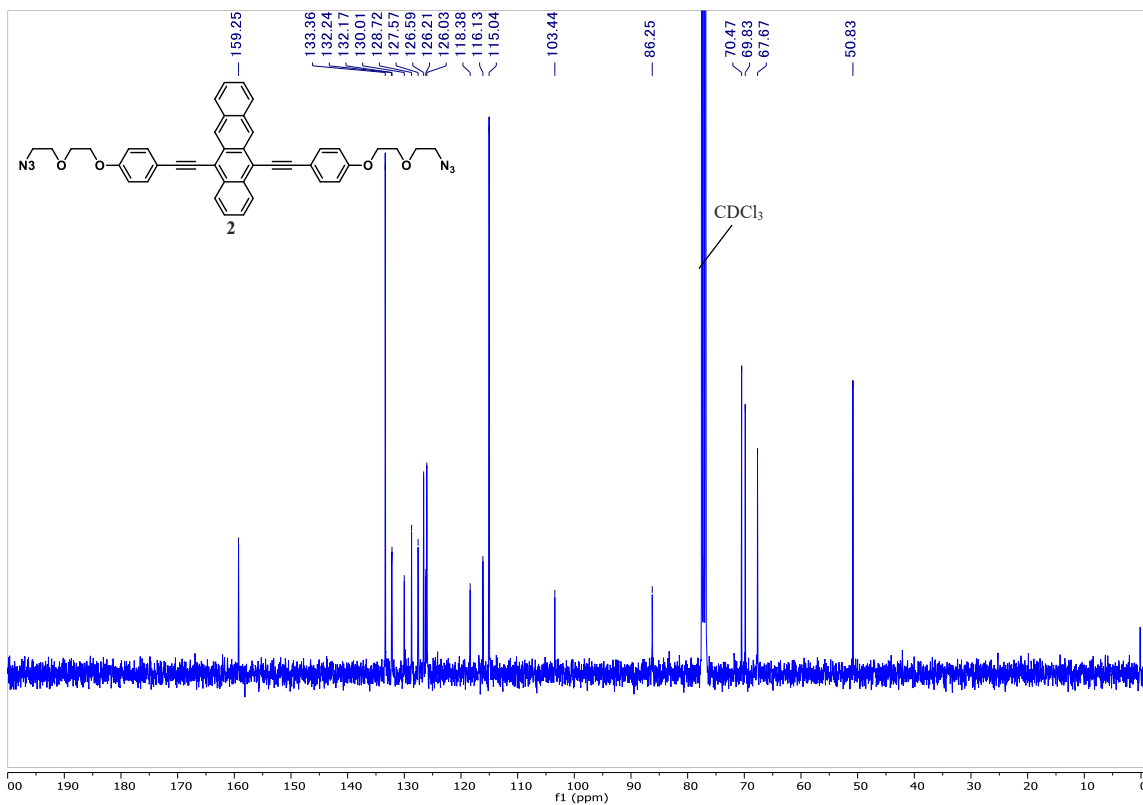

**Fig. S5** <sup>13</sup>C NMR (100 MHz, CDCl<sub>3</sub>) spectrum of compound 2.

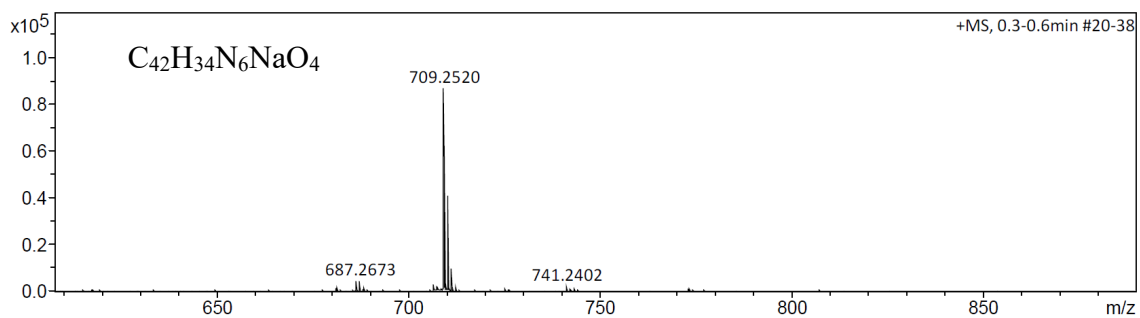

**Fig. S6** High resolution ESI-TOF-MS spectrum of compound 2.

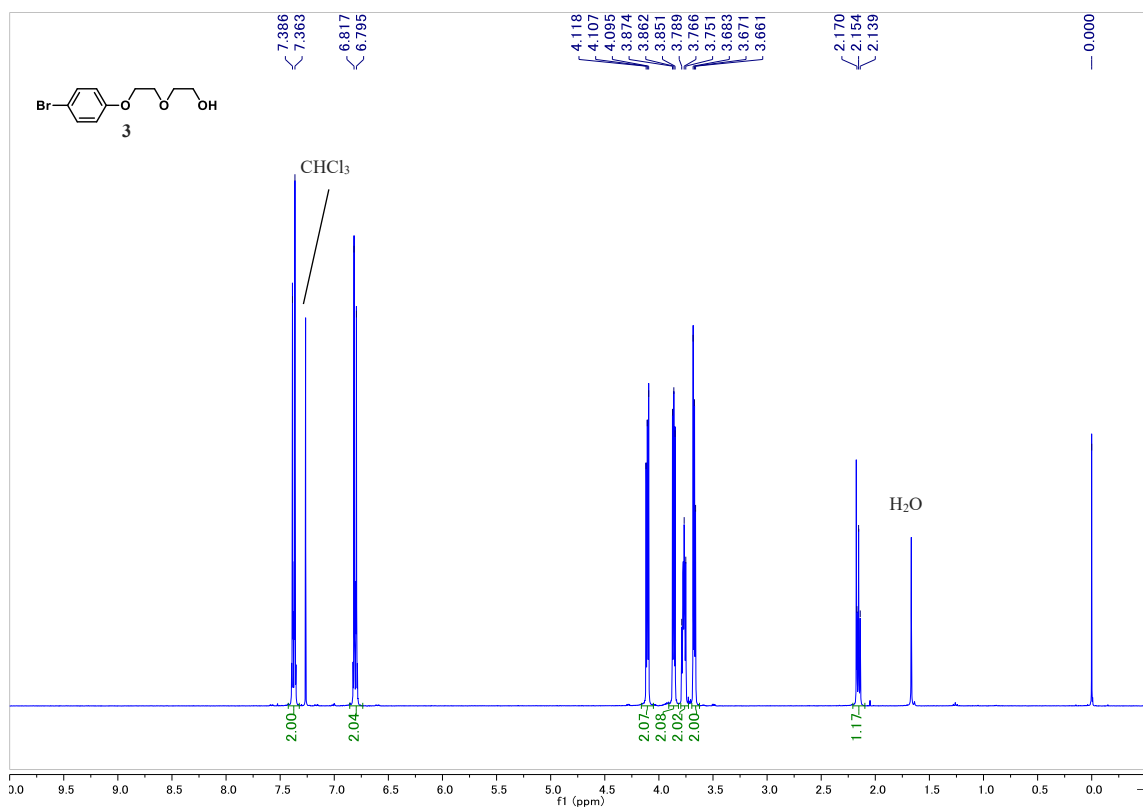

**Fig. S7** <sup>1</sup>H NMR (400 MHz, CDCl<sub>3</sub>) spectrum of compound **3**.

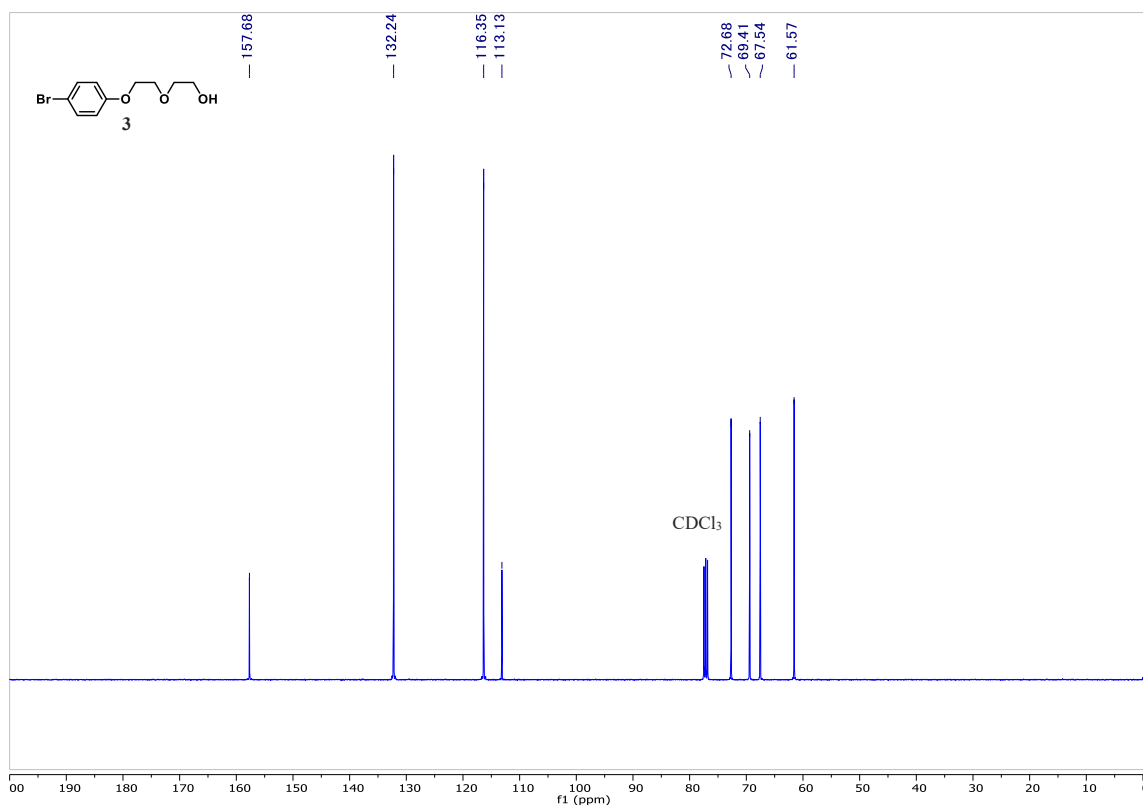

**Fig. S8** <sup>13</sup>C NMR (100 MHz, CDCl<sub>3</sub>) spectrum of compound **3**.

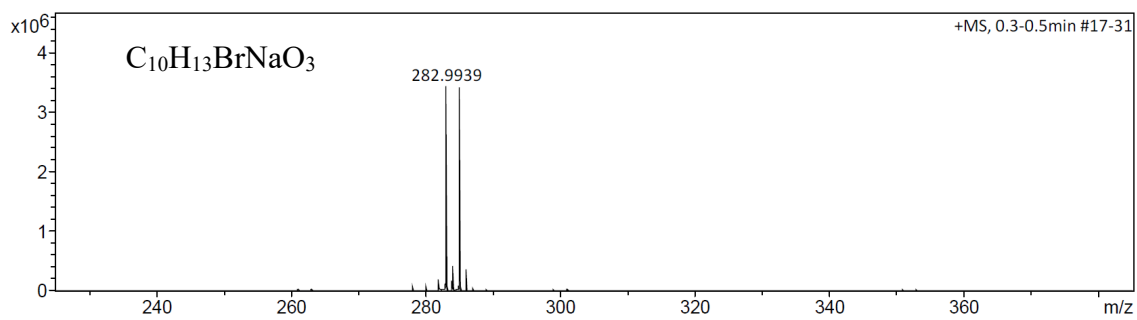

**Fig. S9** High resolution ESI-TOF-MS spectrum of compound **3**.

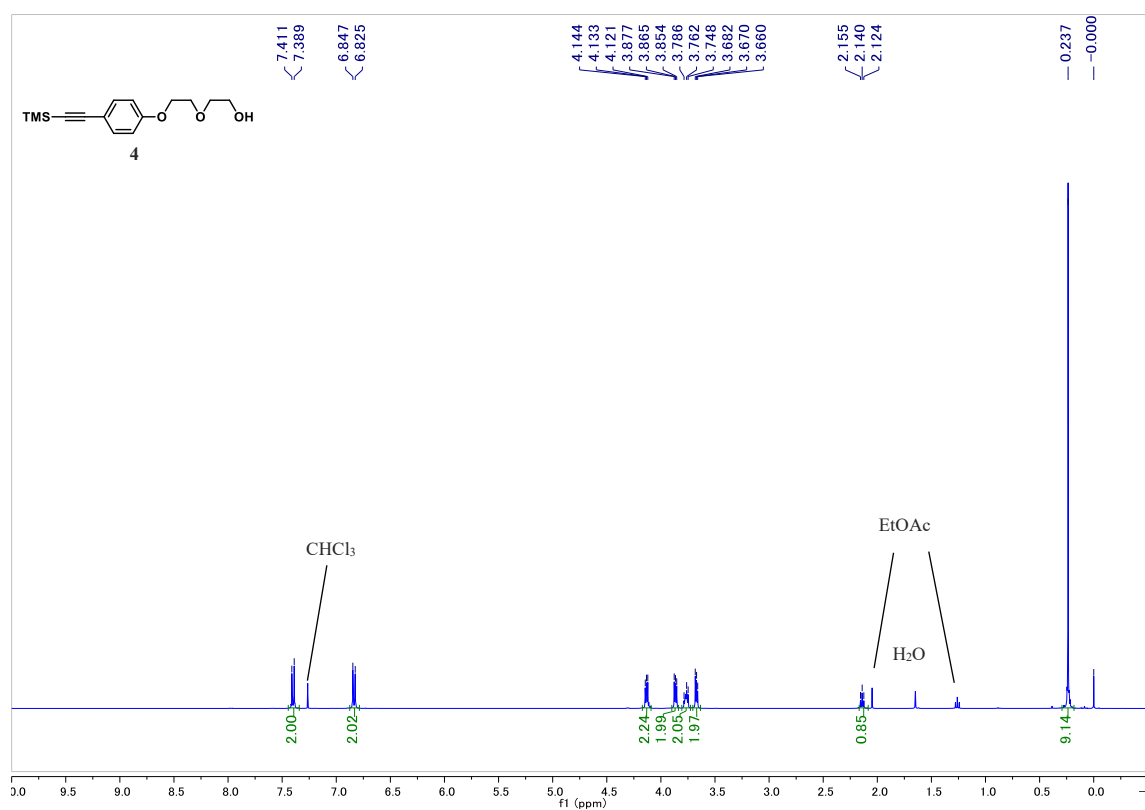

**Fig. S10**  $^1H$  NMR (400 MHz,  $CDCl_3$ ) spectrum of compound **4**.

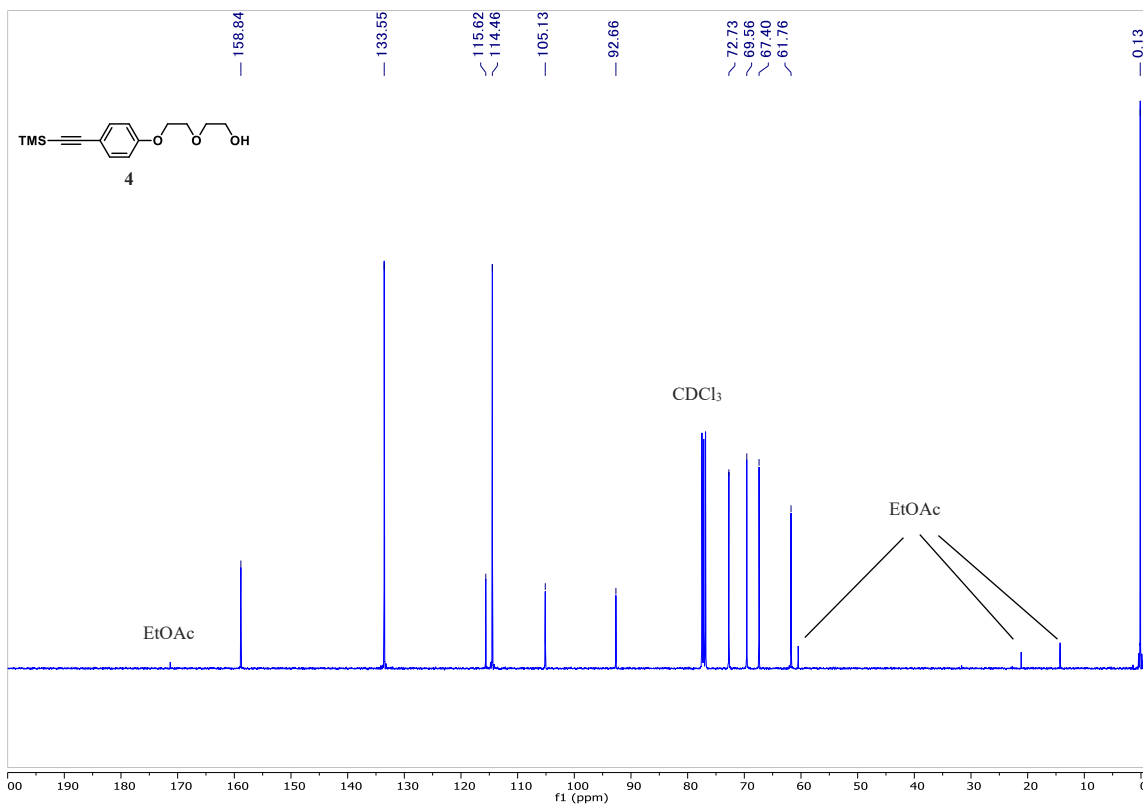

**Fig. S11**  $^{13}\text{C}$  NMR (100 MHz,  $\text{CDCl}_3$ ) spectrum of compound 4.

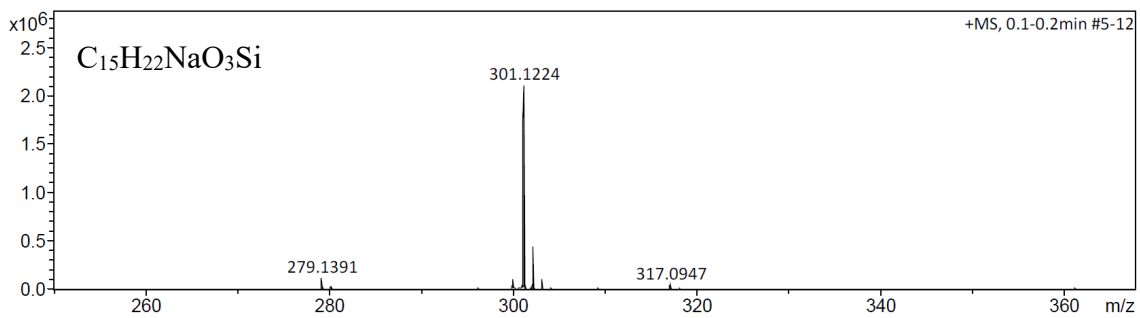

**Fig. S12** High resolution ESI-TOF-MS spectrum of compound 4.

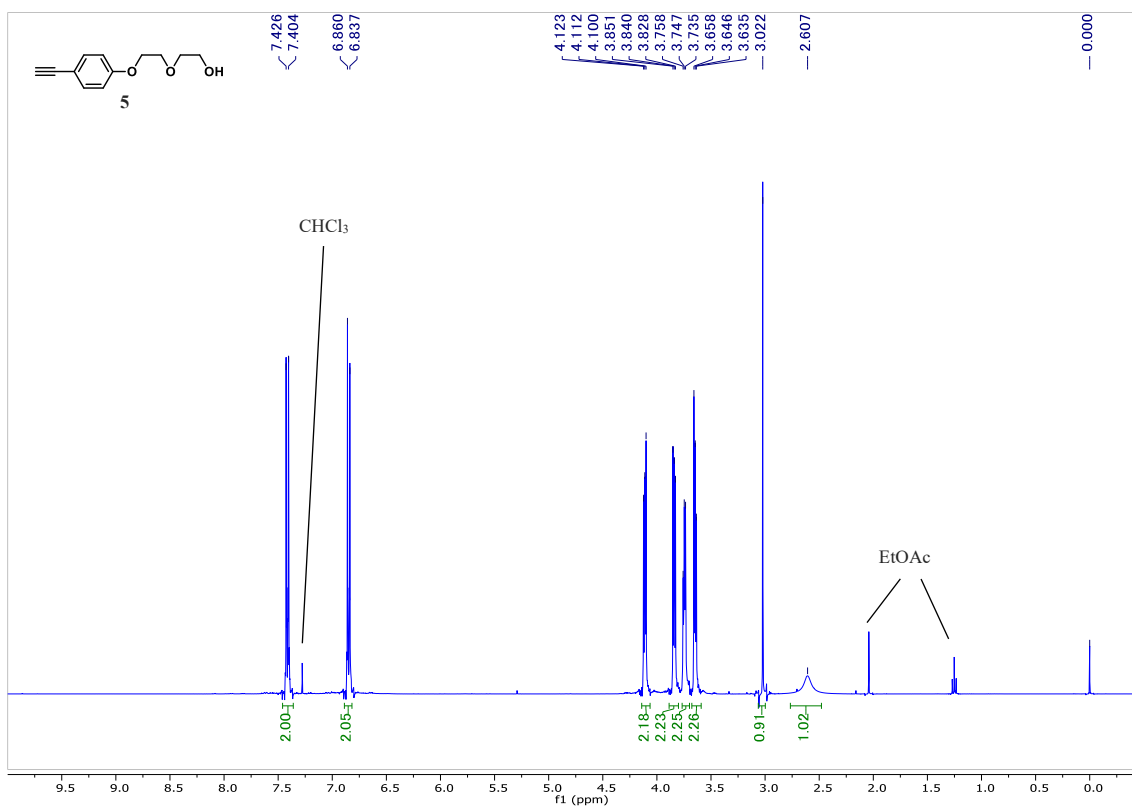

Fig. S13 <sup>1</sup>H NMR (400 MHz, CDCl<sub>3</sub>) spectrum of compound 5.

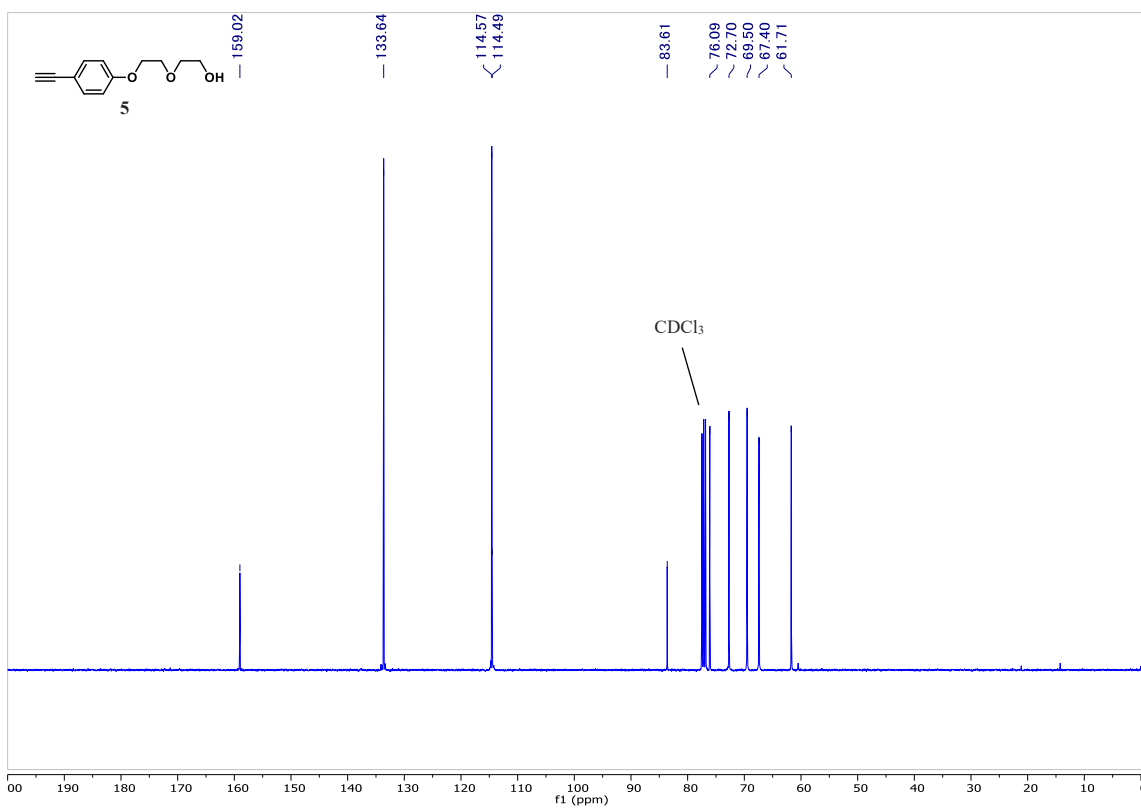

Fig. S14 <sup>13</sup>C NMR (100 MHz, CDCl<sub>3</sub>) spectrum of compound 5.

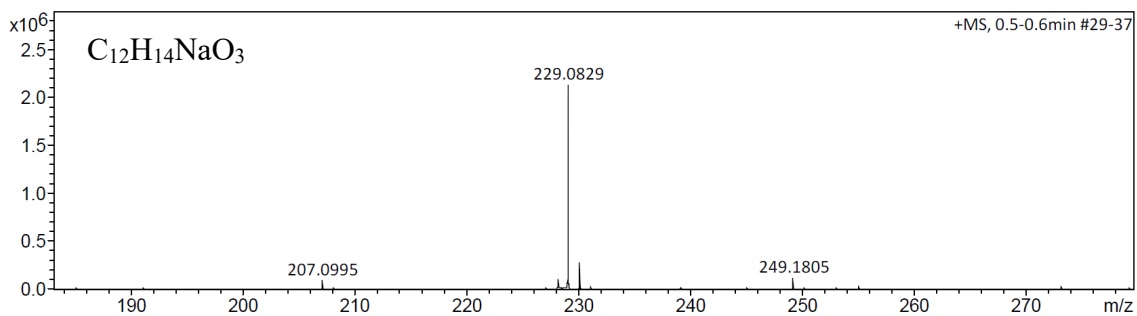

**Fig. S15** High resolution ESI-TOF-MS spectrum of compound 5.

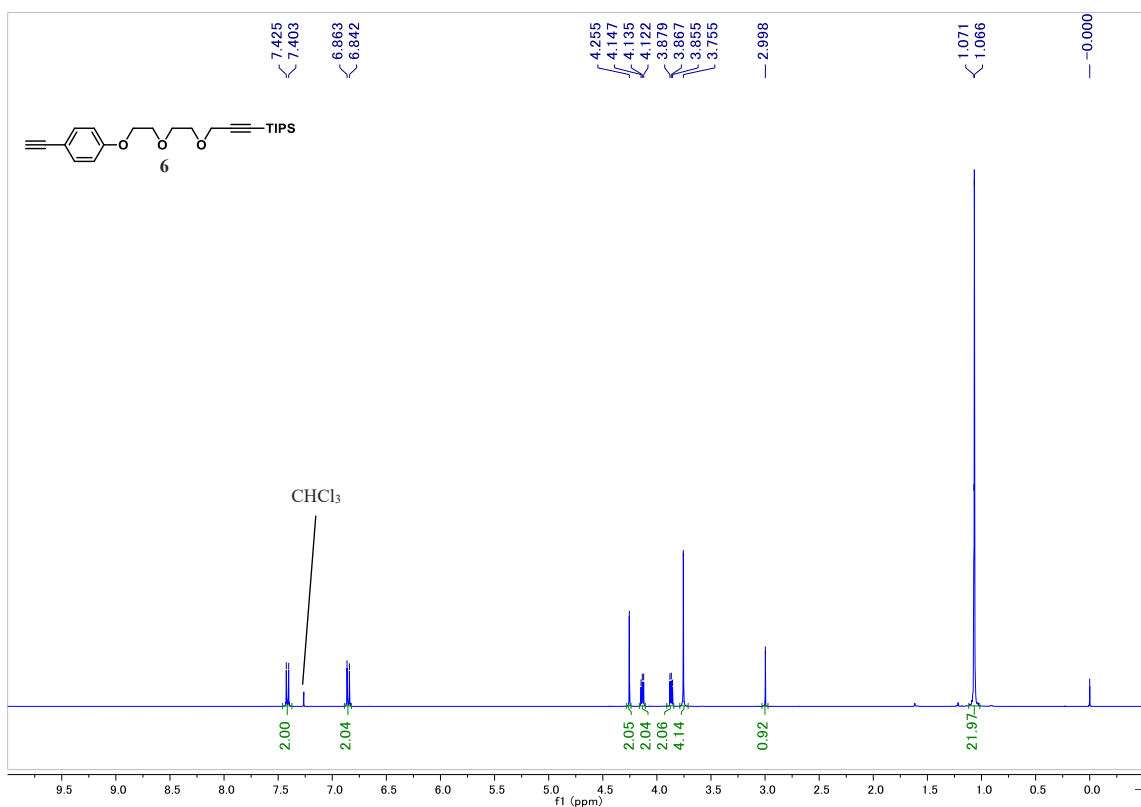

**Fig. S16** <sup>1</sup>H NMR (400 MHz, CDCl<sub>3</sub>) spectrum of compound 6.



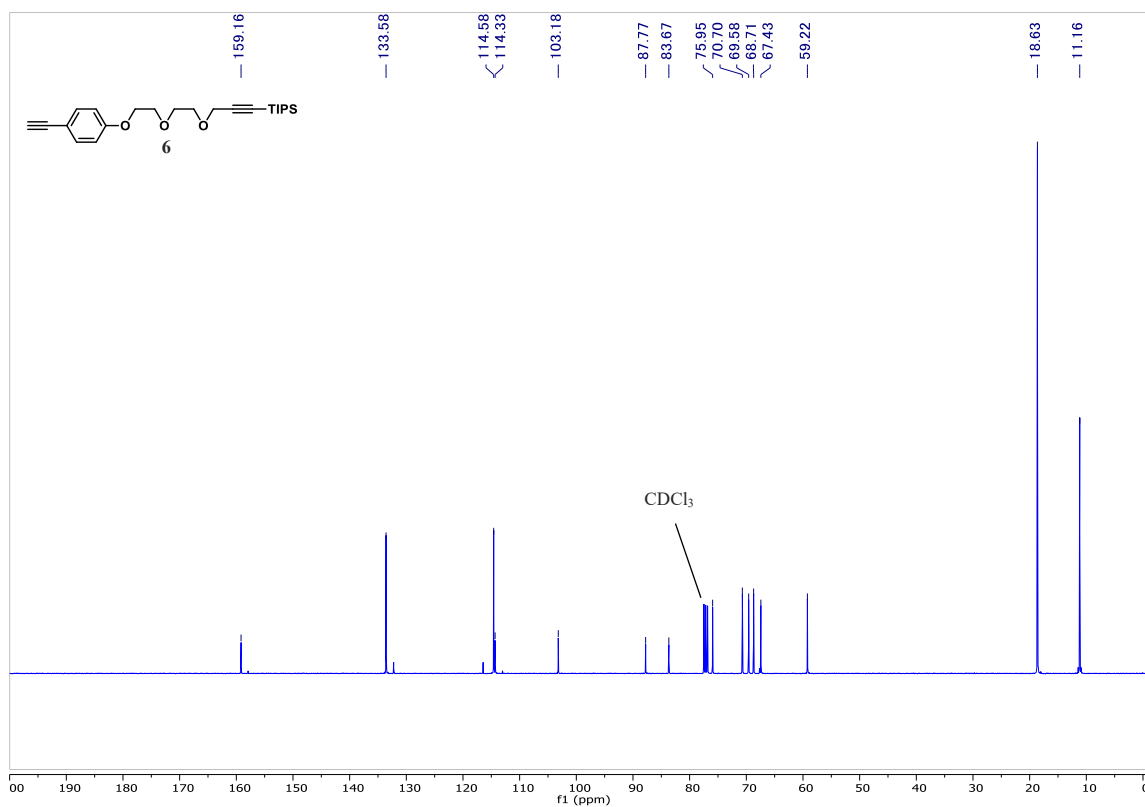

**Fig. S17** <sup>13</sup>C NMR (100 MHz, CDCl<sub>3</sub>) spectrum of compound 6.

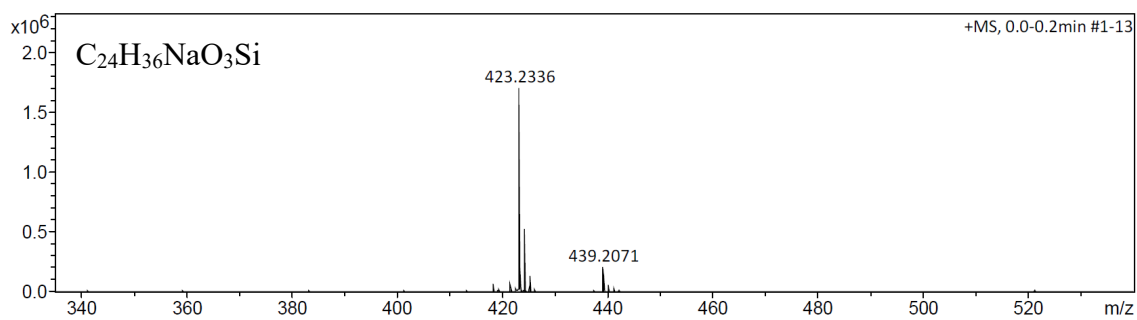

**Fig. S18** High resolution ESI-TOF-MS spectrum of compound 6.

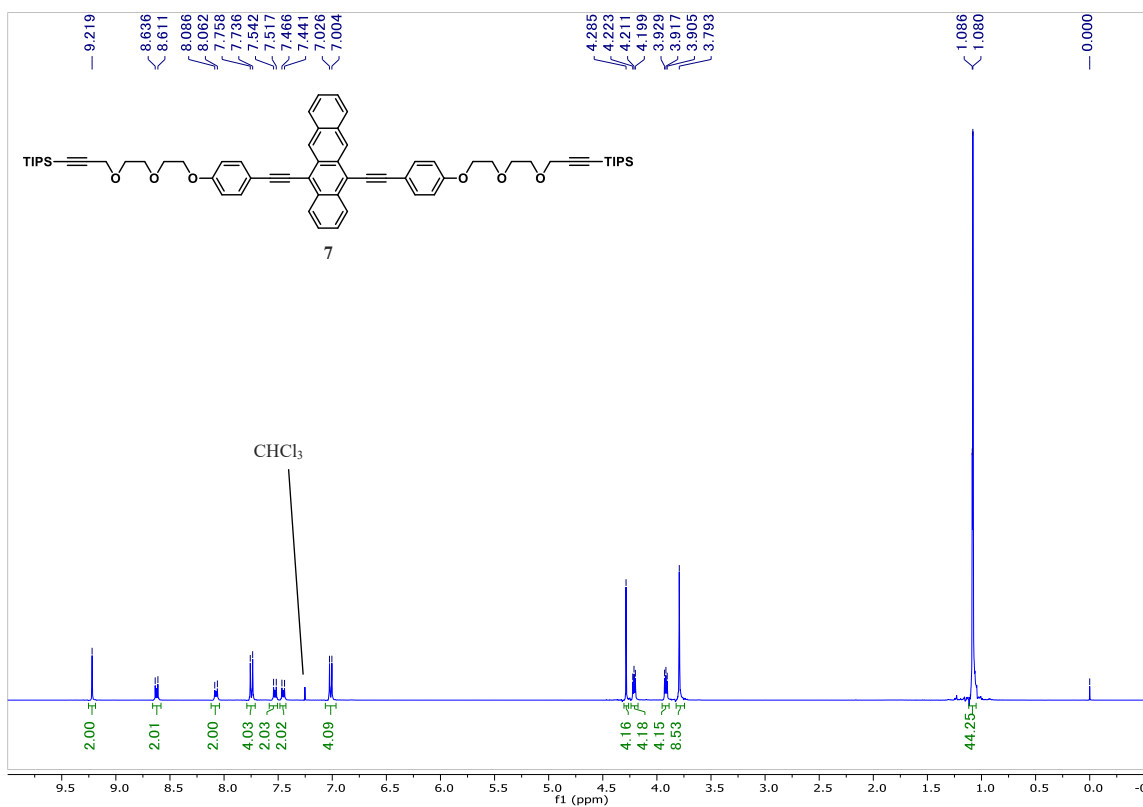

Fig. S19 <sup>1</sup>H NMR (400 MHz, CDCl<sub>3</sub>) spectrum of compound 7.

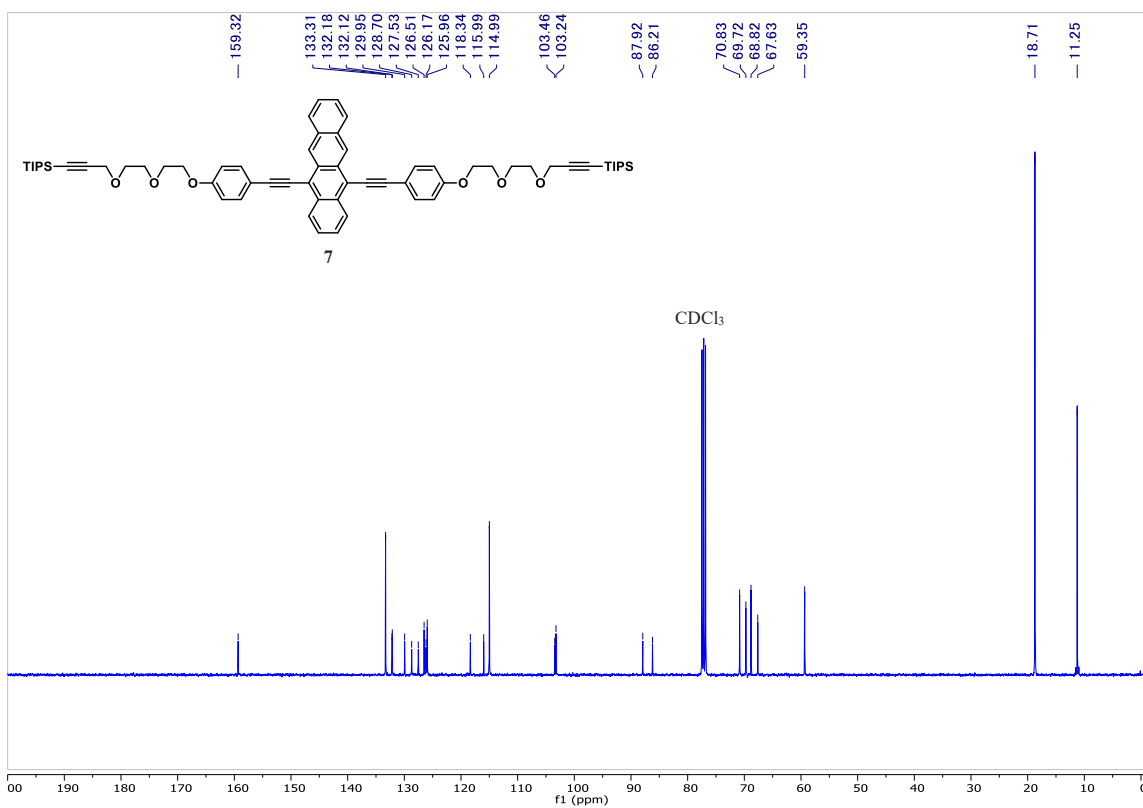

Fig. S20 <sup>13</sup>C NMR (100 MHz, CDCl<sub>3</sub>) spectrum of compound 7.

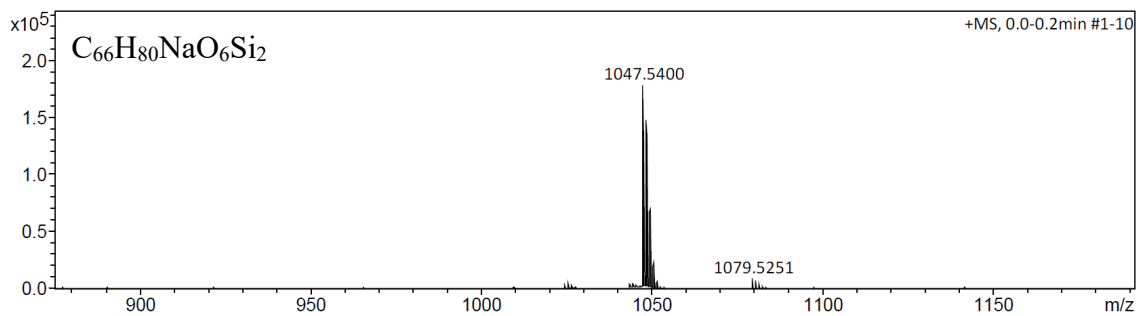

**Fig. S21** High resolution ESI-TOF-MS spectrum of compound 7.

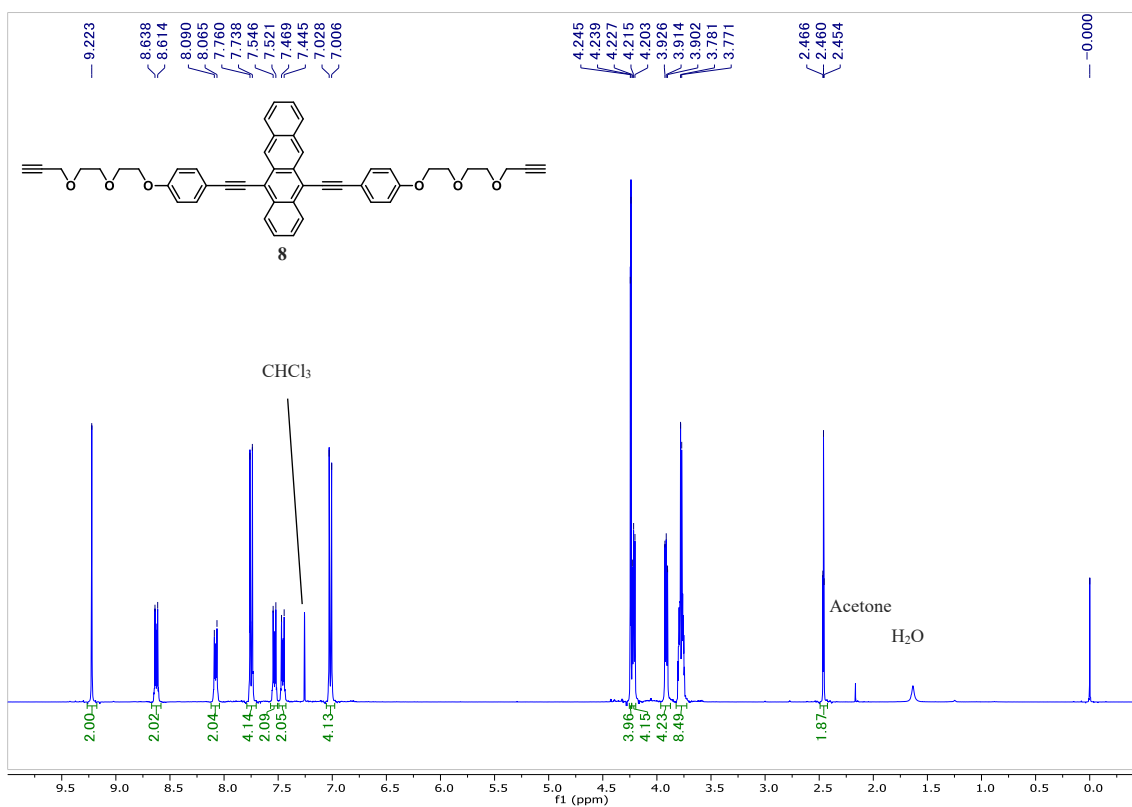

**Fig. S22** <sup>1</sup>H NMR (400 MHz, CDCl<sub>3</sub>) spectrum of compound 8.

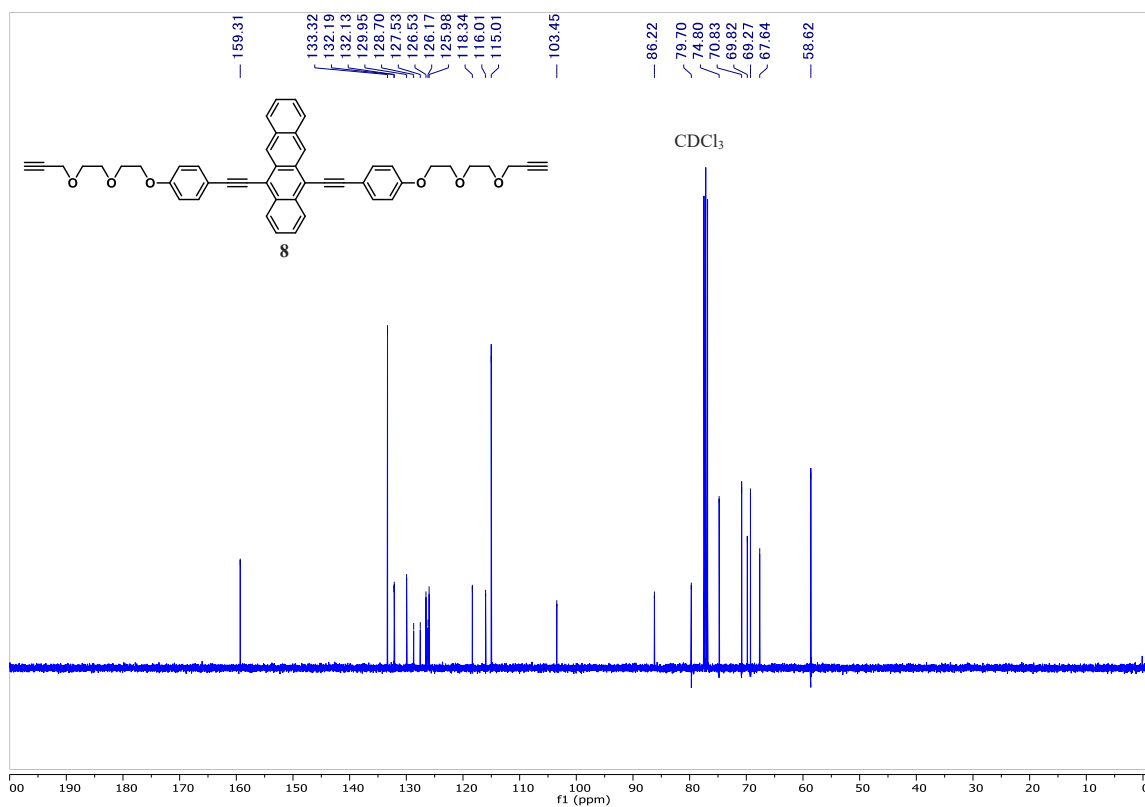

**Fig. S23**  $^{13}\text{C}$  NMR (100 MHz,  $\text{CDCl}_3$ ) spectrum of compound **8**.

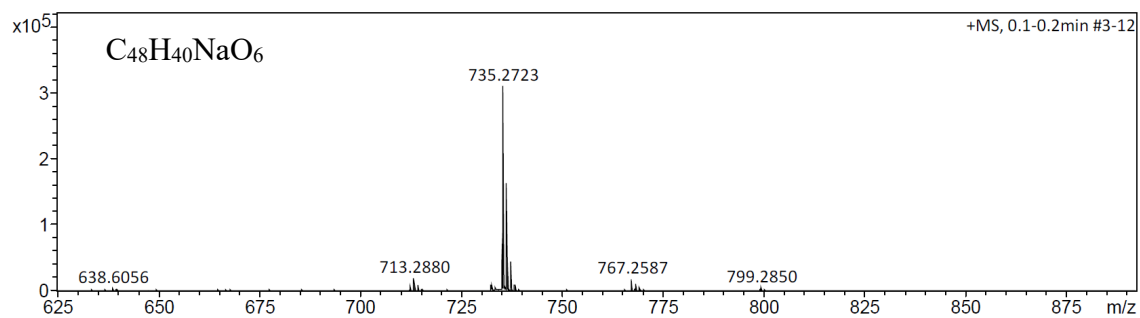

**Fig. S24** High resolution ESI-TOF-MS spectrum of compound **8**.

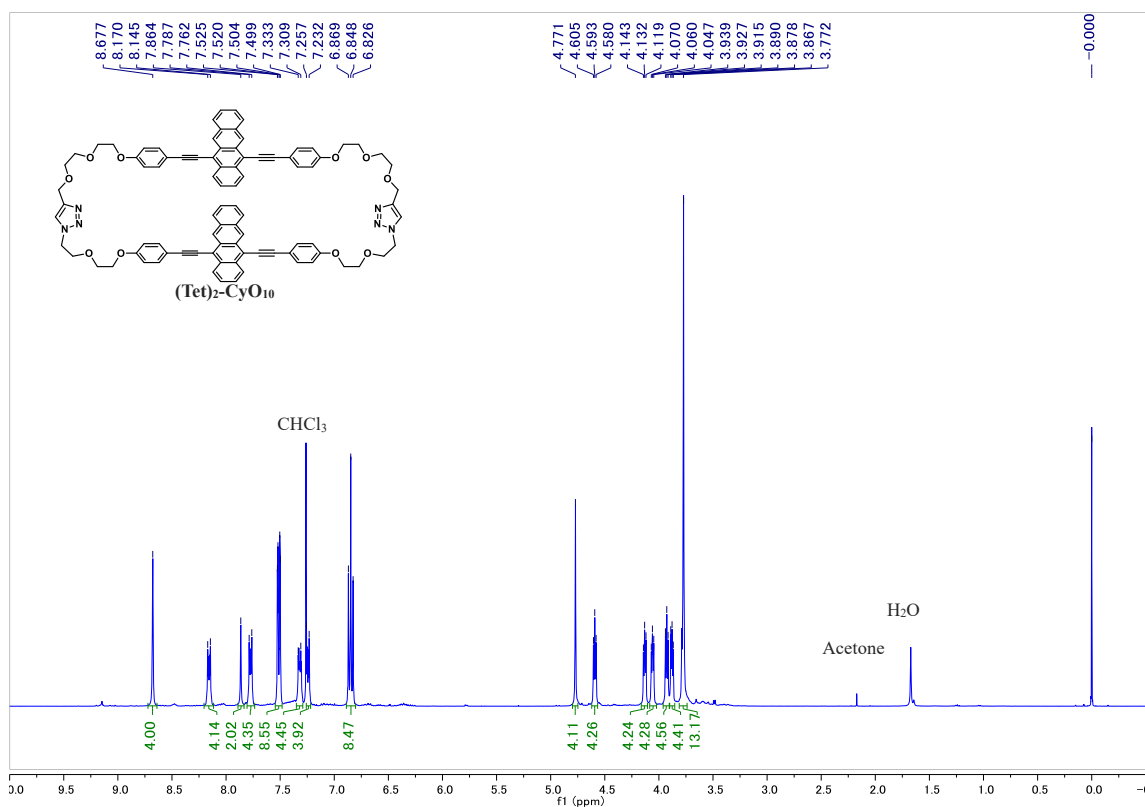

Fig. S25  $^1\text{H}$  NMR (400 MHz,  $\text{CDCl}_3$ ) spectrum of  $(\text{Tet})_2\text{-CyO}_{10}$ .

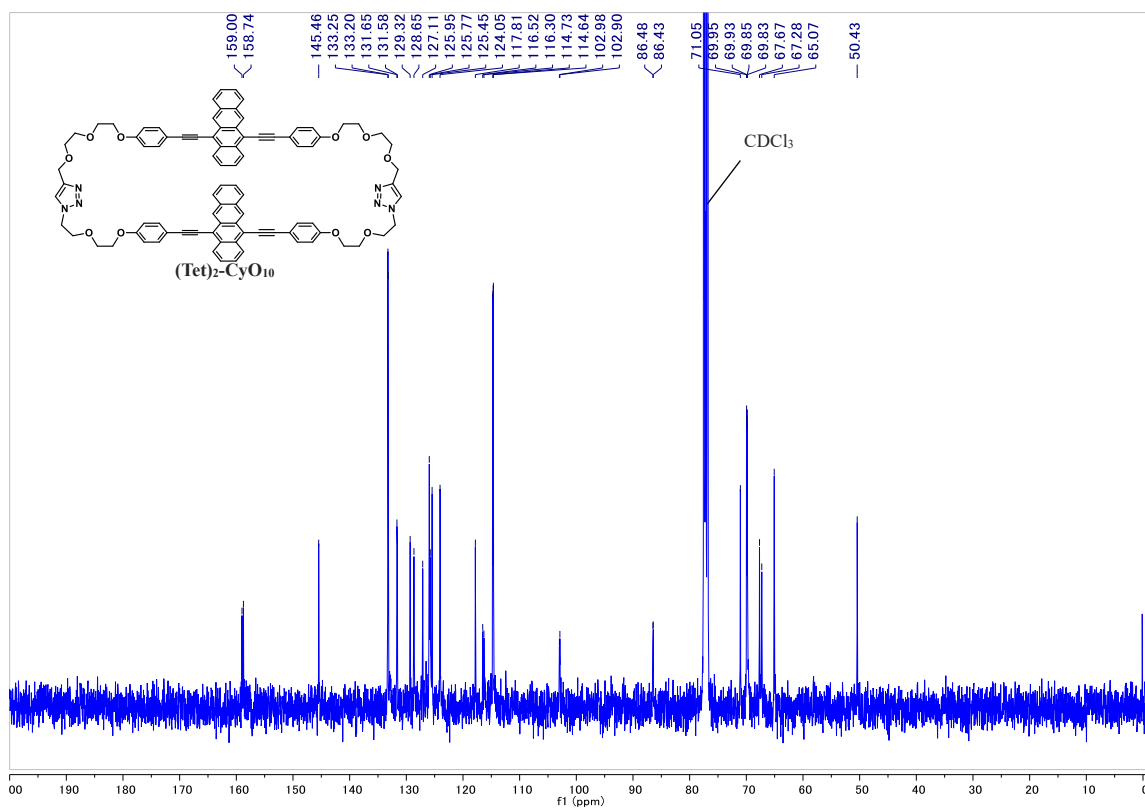

Fig. S26  $^{13}\text{C}$  NMR (100 MHz,  $\text{CDCl}_3$ ) spectrum of  $(\text{Tet})_2\text{-CyO}_{10}$ .

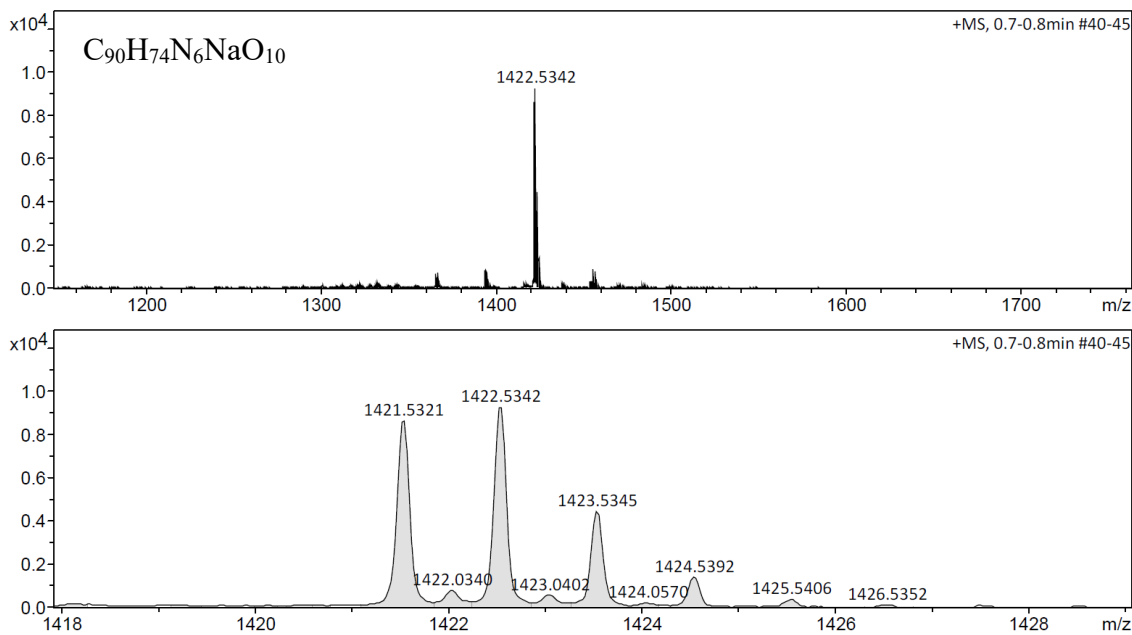

**Fig. S27** High resolution ESI-TOF-MS spectrum of  $(Tet)_2-CyO_{10}$ .

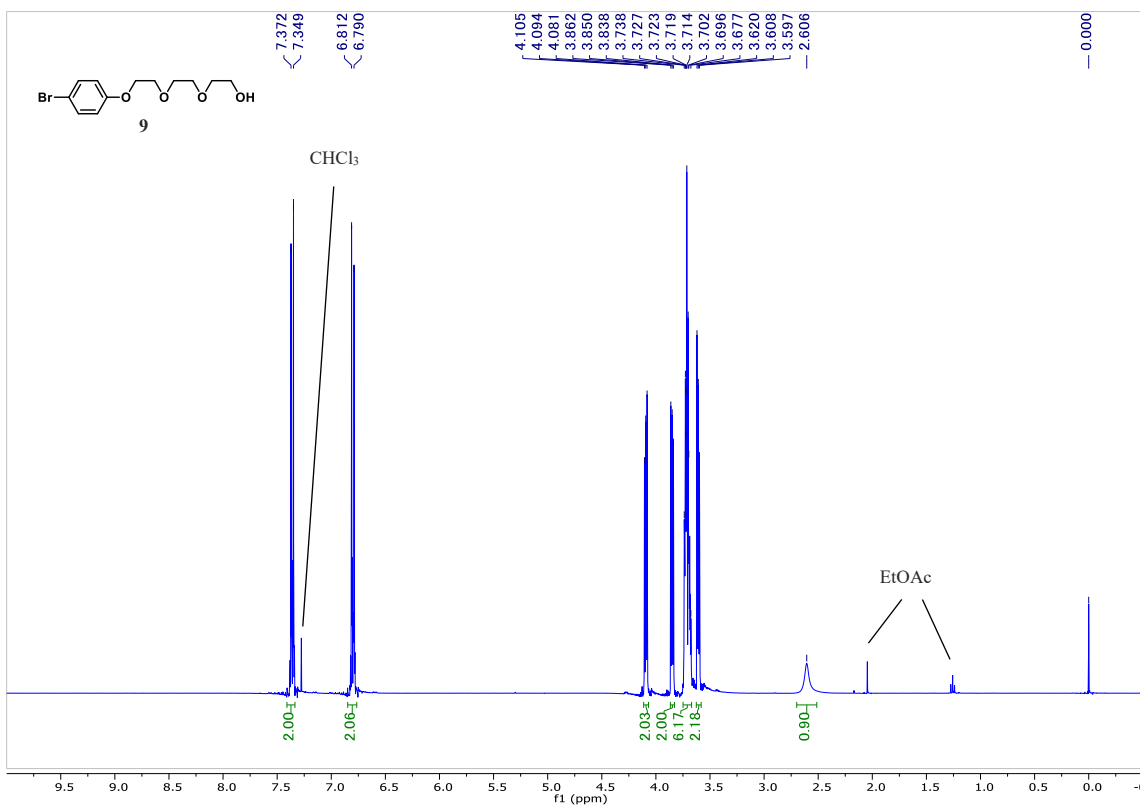

**Fig. S28**  $^1H$  NMR (400 MHz,  $CDCl_3$ ) spectrum of compound **9**.

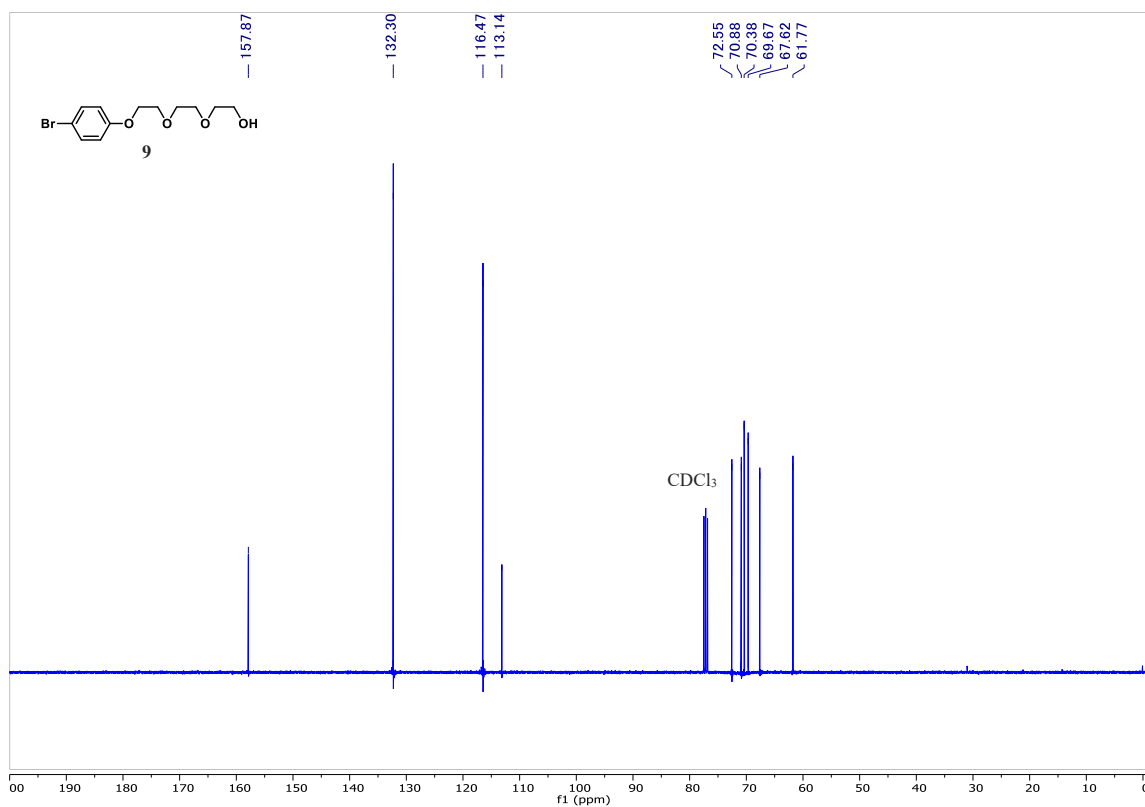

**Fig. S29**  $^{13}\text{C}$  NMR (100 MHz,  $\text{CDCl}_3$ ) spectrum of compound **9**.

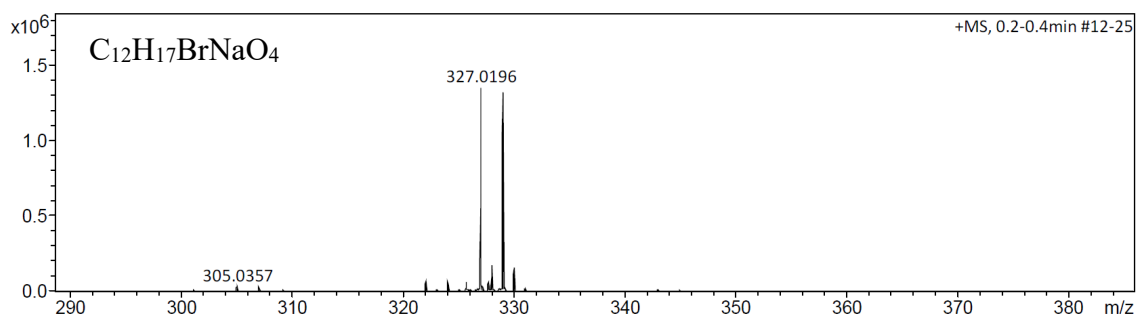

**Fig. S30** High resolution ESI-TOF-MS spectrum of compound **9**.

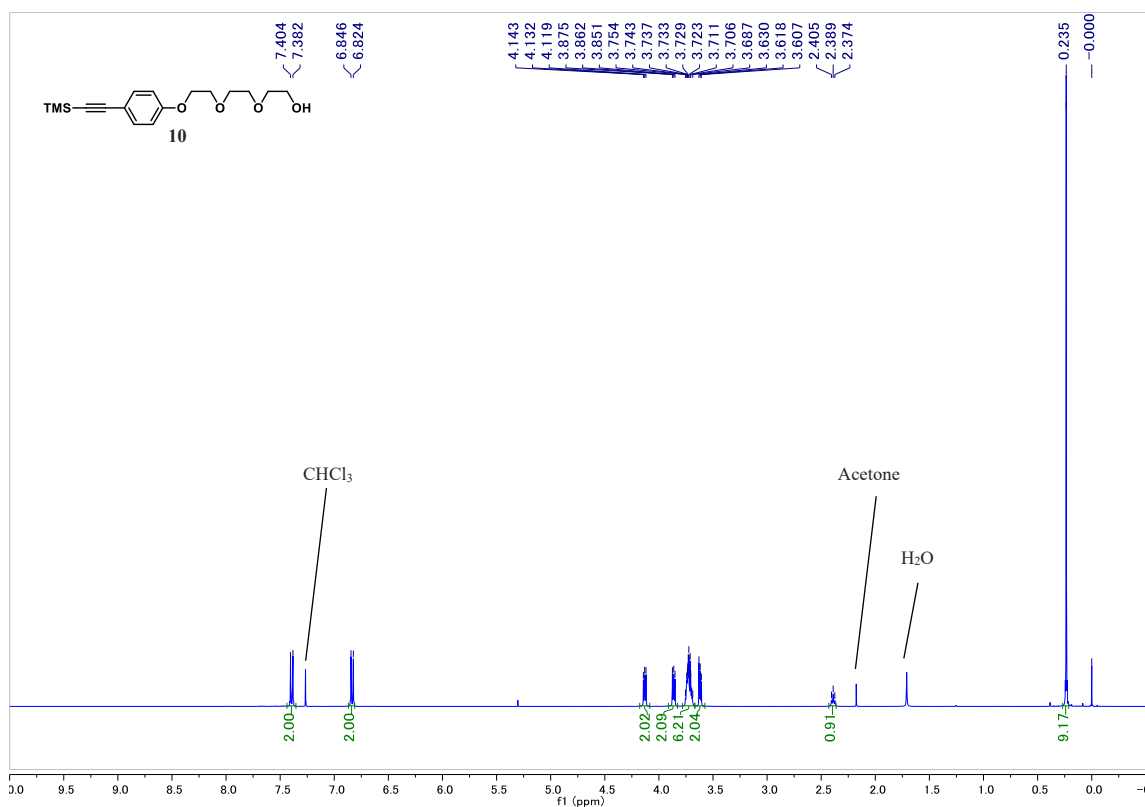

Fig. S31 <sup>1</sup>H NMR (400 MHz, CDCl<sub>3</sub>) spectrum of compound 10.

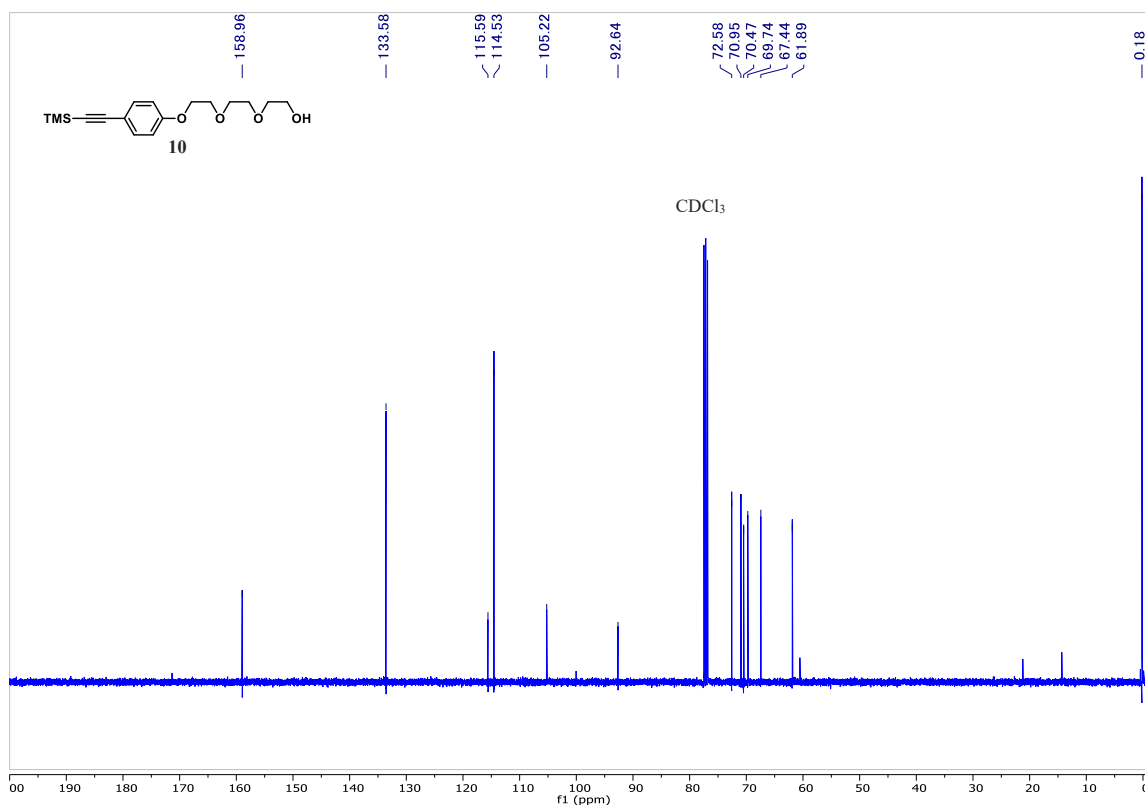

Fig. S32 <sup>13</sup>C NMR (100 MHz, CDCl<sub>3</sub>) spectrum of compound 10.



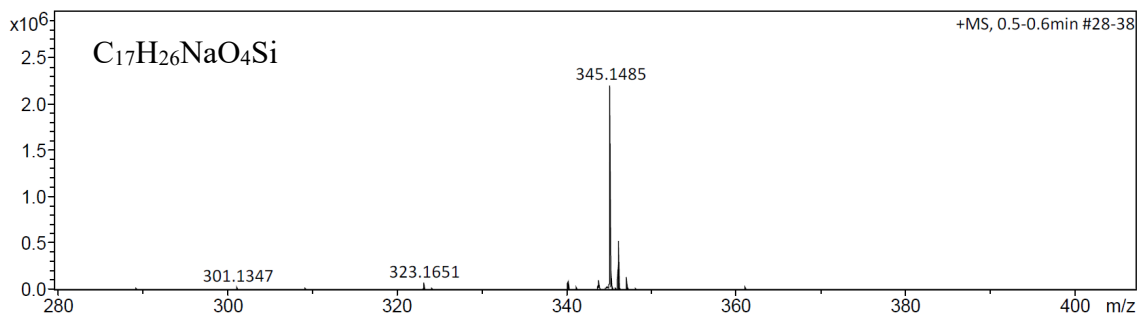

**Fig. S33** High resolution ESI-TOF-MS spectrum of compound **10**.

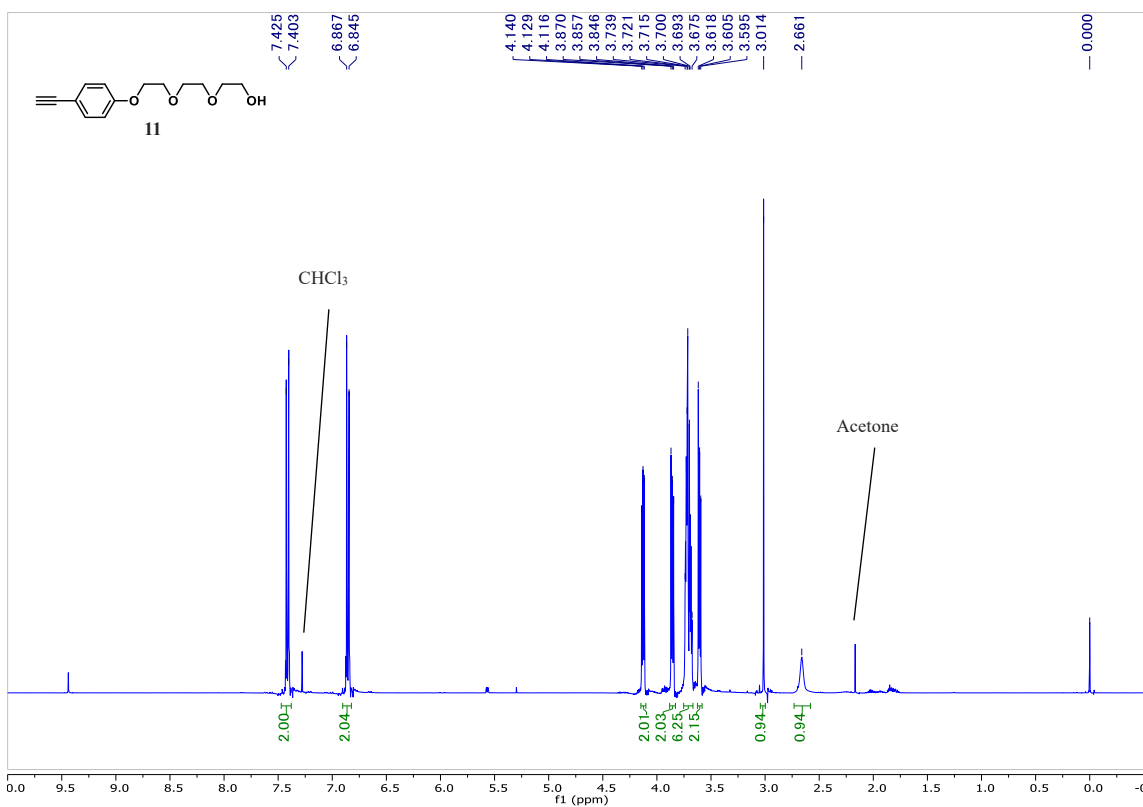

**Fig. S34** <sup>1</sup>H NMR (400 MHz, CDCl<sub>3</sub>) spectrum of compound **11**.

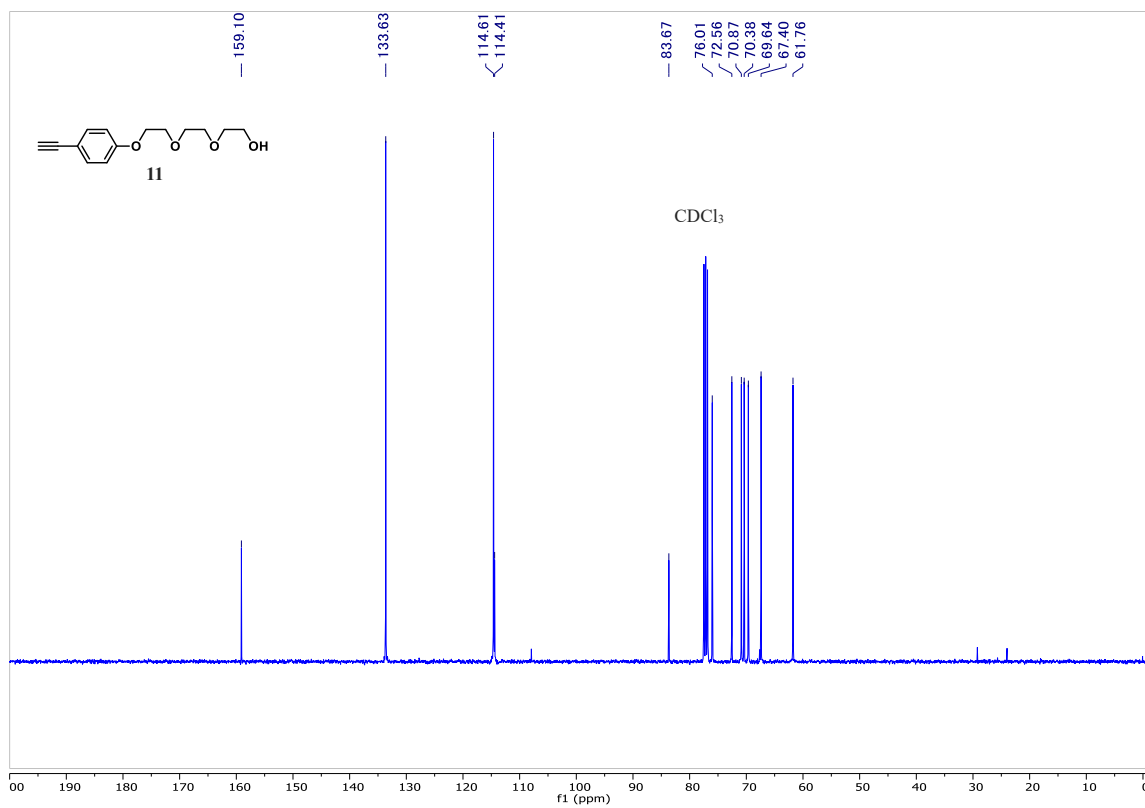

**Fig. S35**  $^{13}\text{C}$  NMR (100 MHz,  $\text{CDCl}_3$ ) spectrum of compound **11**.

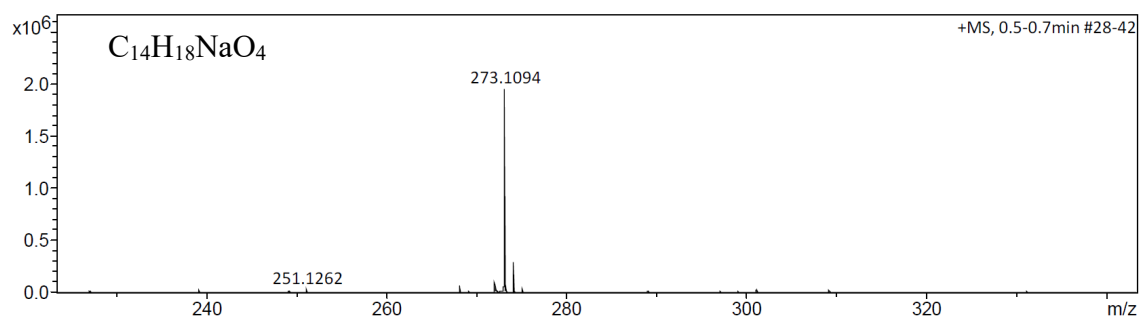

**Fig. S36** High resolution ESI-TOF-MS spectrum of compound **11**.

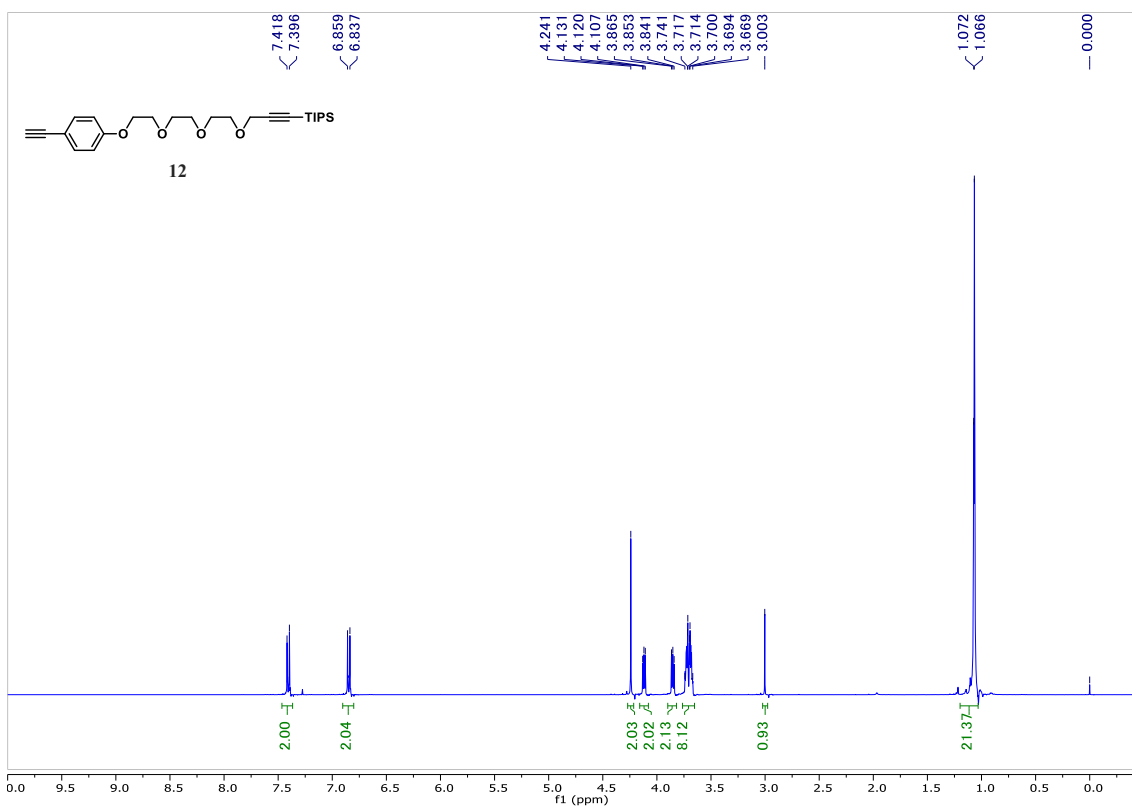

**Fig. S37** <sup>1</sup>H NMR (400 MHz, CDCl<sub>3</sub>) spectrum of compound 12.

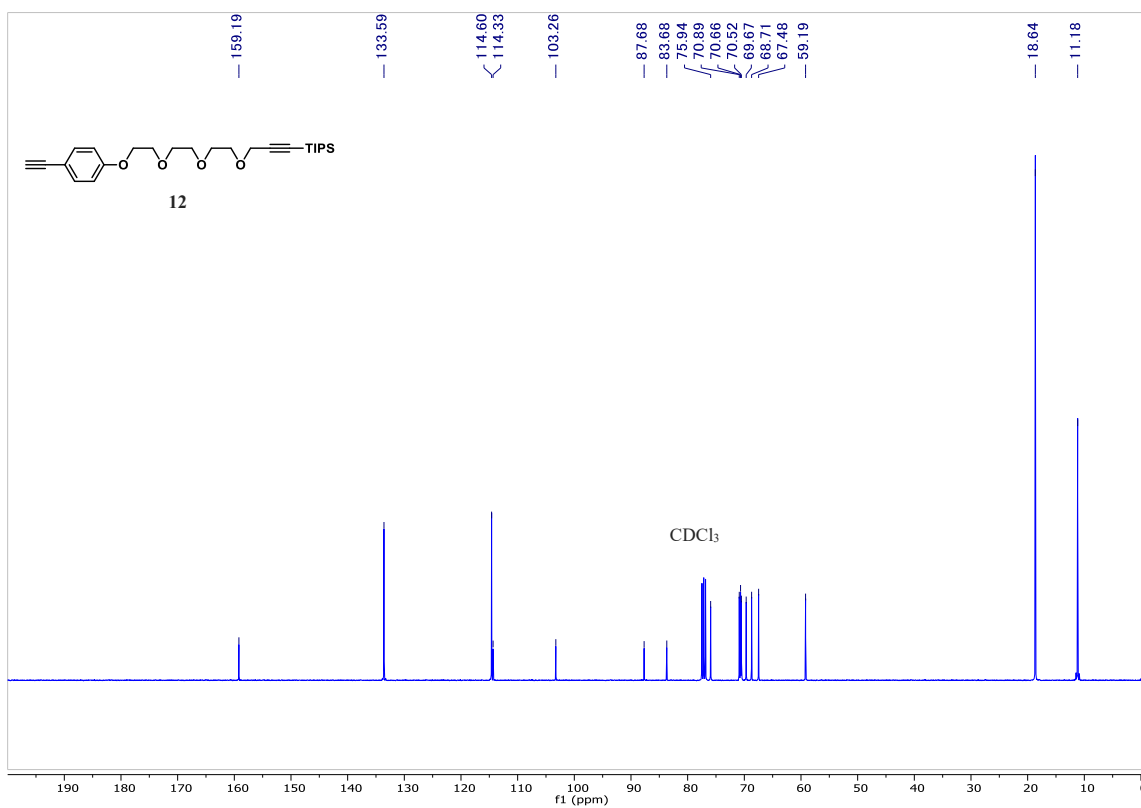

**Fig. S38** <sup>13</sup>C NMR (100 MHz, CDCl<sub>3</sub>) spectrum of compound 12.

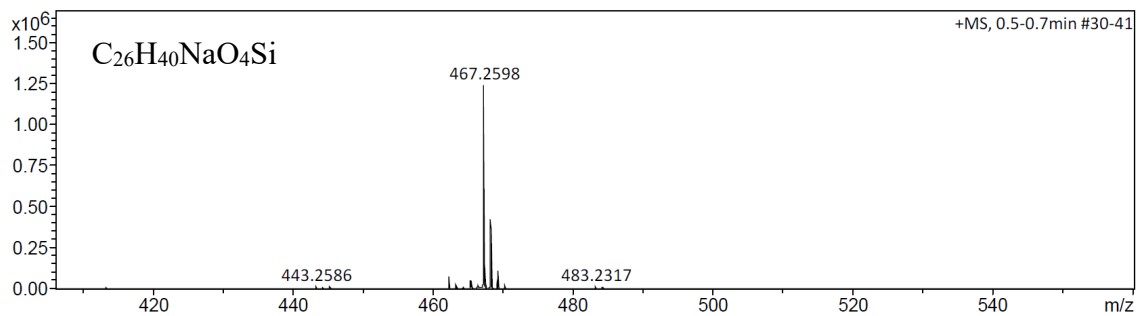

**Fig. S39** High resolution ESI-TOF-MS spectrum of compound **12**.

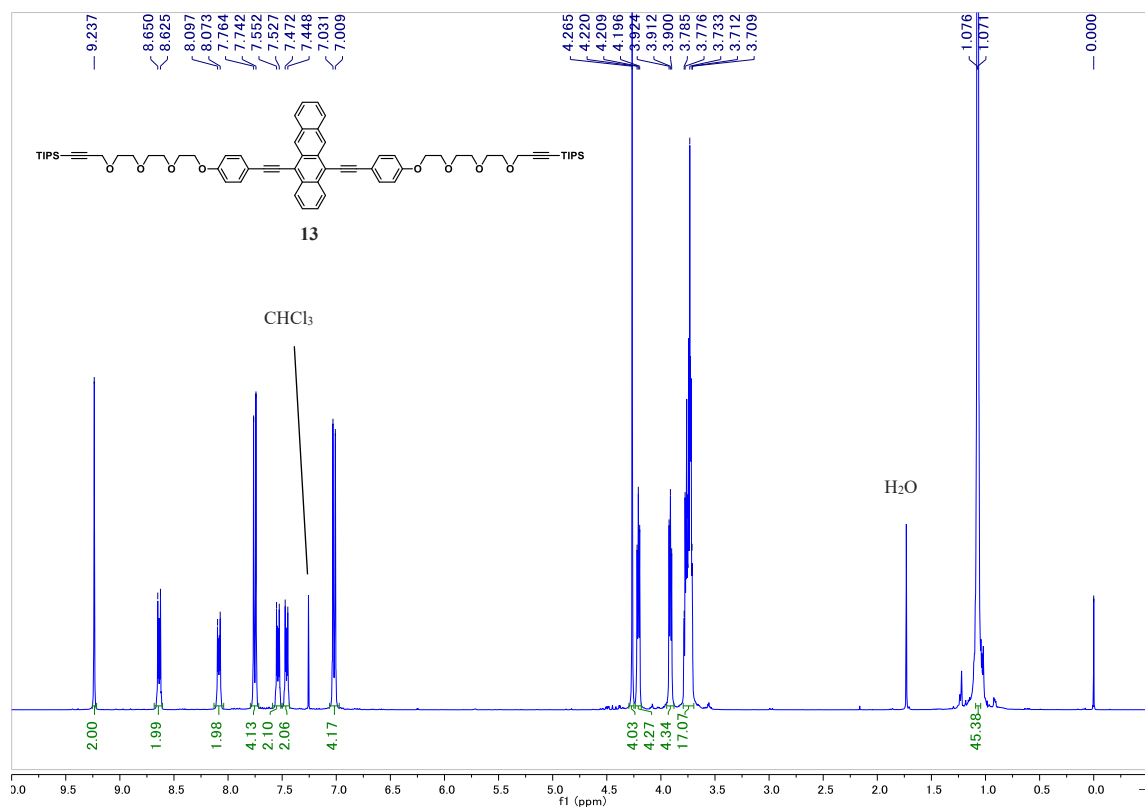

**Fig. S40**  $^1H$  NMR (400 MHz,  $CDCl_3$ ) spectrum of compound **13**.

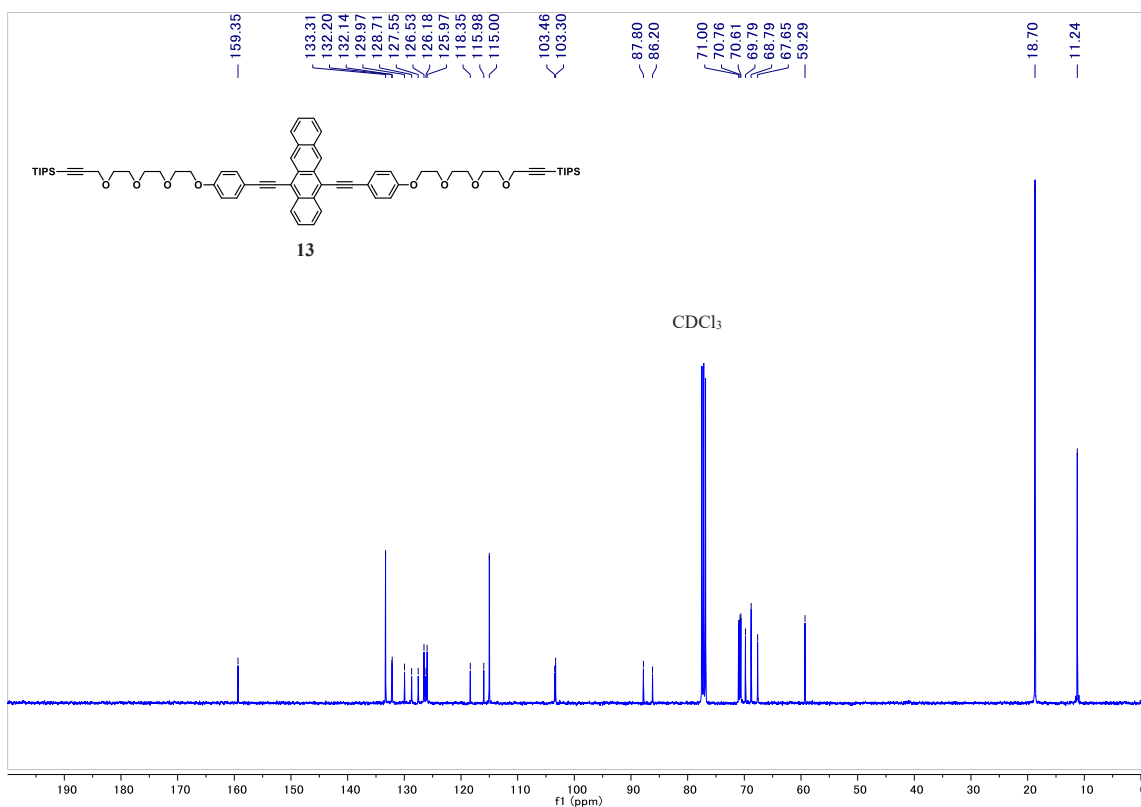

**Fig. S41** <sup>13</sup>C NMR (100 MHz, CDCl<sub>3</sub>) spectrum of compound **13**.

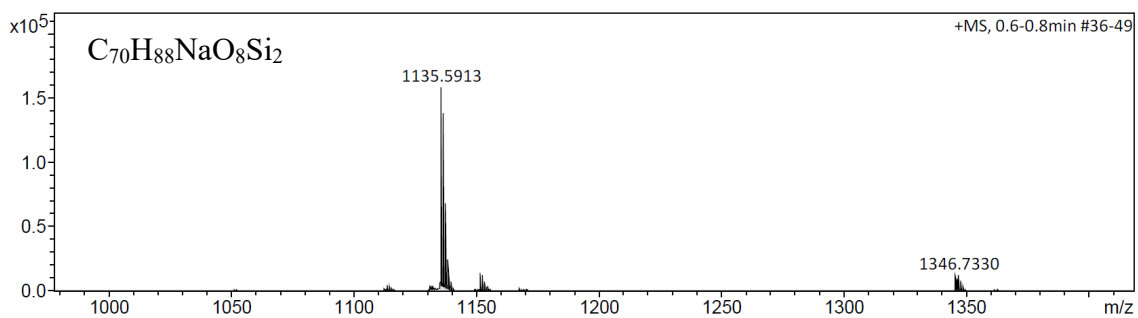

**Fig. S42** High resolution ESI-TOF-MS spectrum of compound **13**.

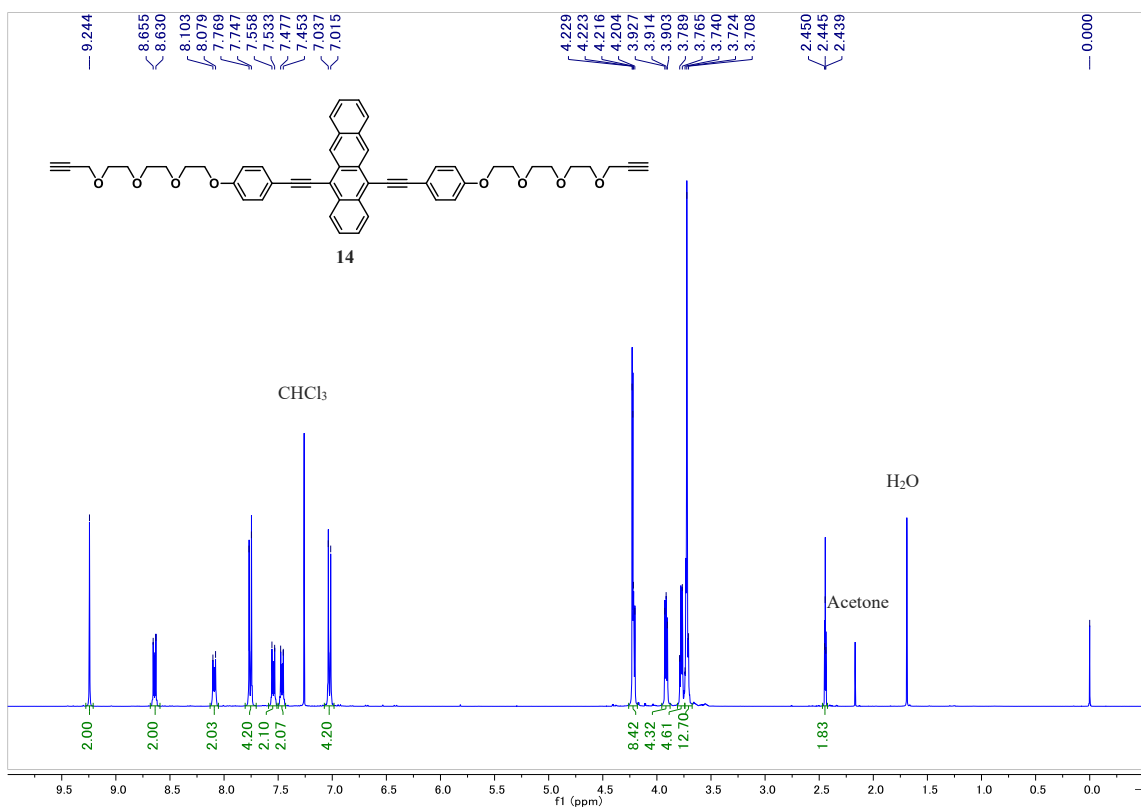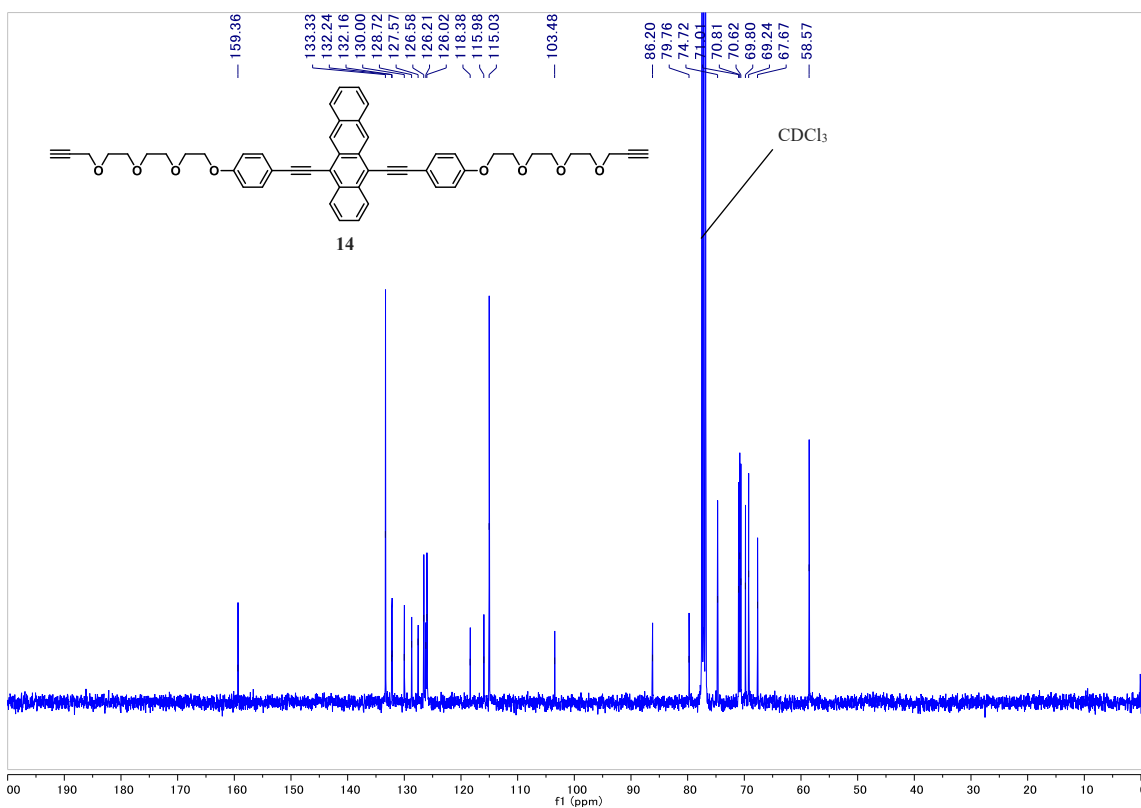

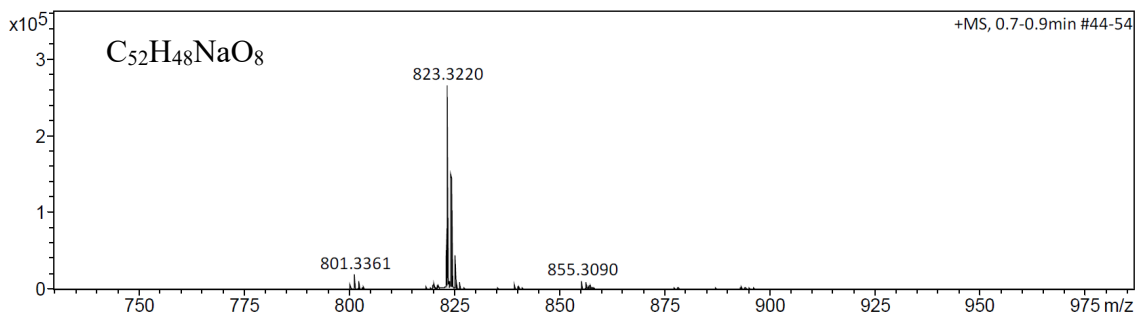

**Fig. S45** High resolution ESI-TOF-MS spectrum of compound **14**.

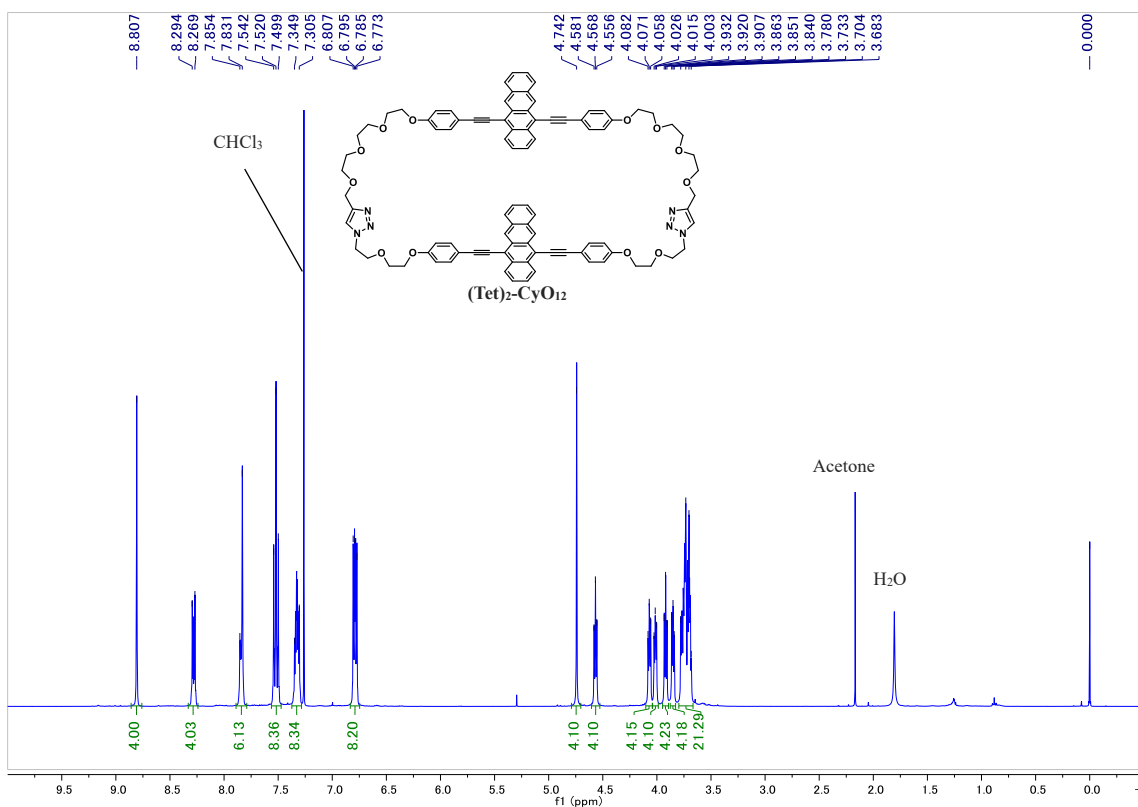

**Fig. S46** <sup>1</sup>H NMR (400 MHz, CDCl<sub>3</sub>) spectrum of (Tet)<sub>2</sub>-CyO<sub>12</sub>.

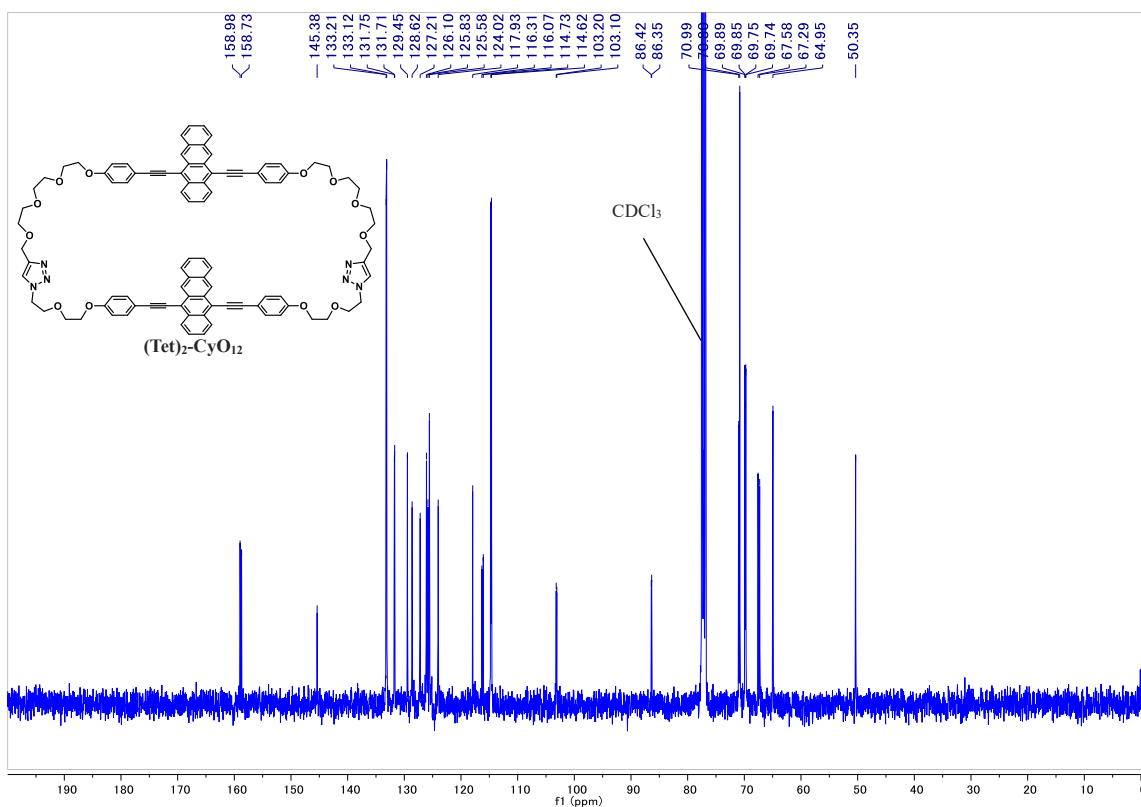

**Fig. S47**  $^{13}\text{C}$  NMR (100 MHz,  $\text{CDCl}_3$ ) spectrum of  $(\text{Tet})_2\text{-CyO}_{12}$ .

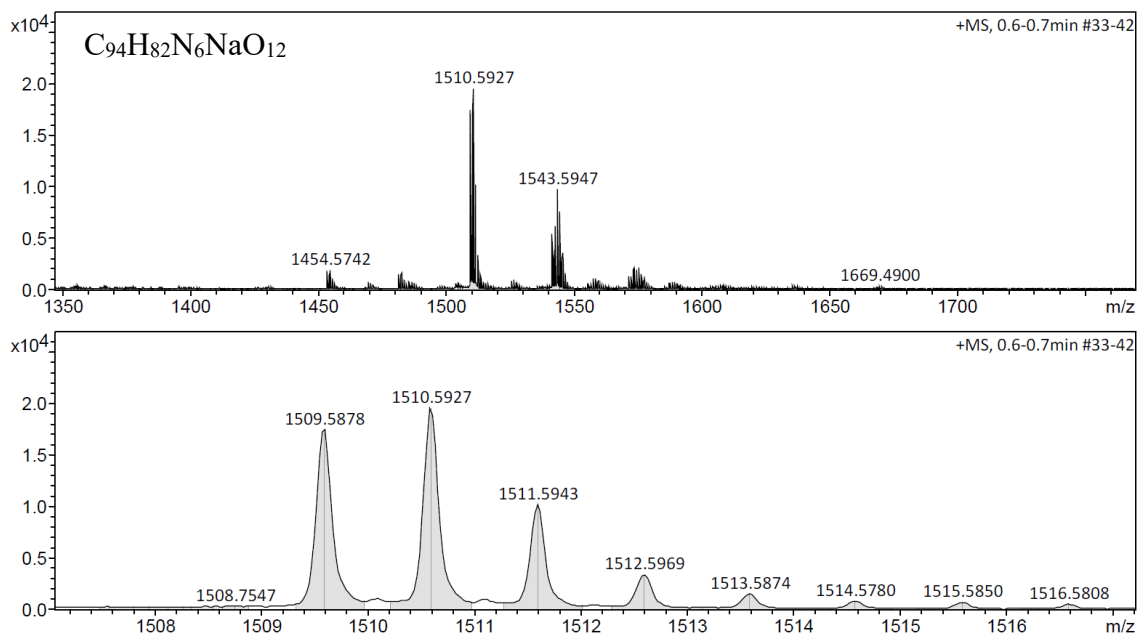

**Fig. S48** High resolution ESI-TOF-MS spectrum of  $(\text{Tet})_2\text{-CyO}_{12}$ .



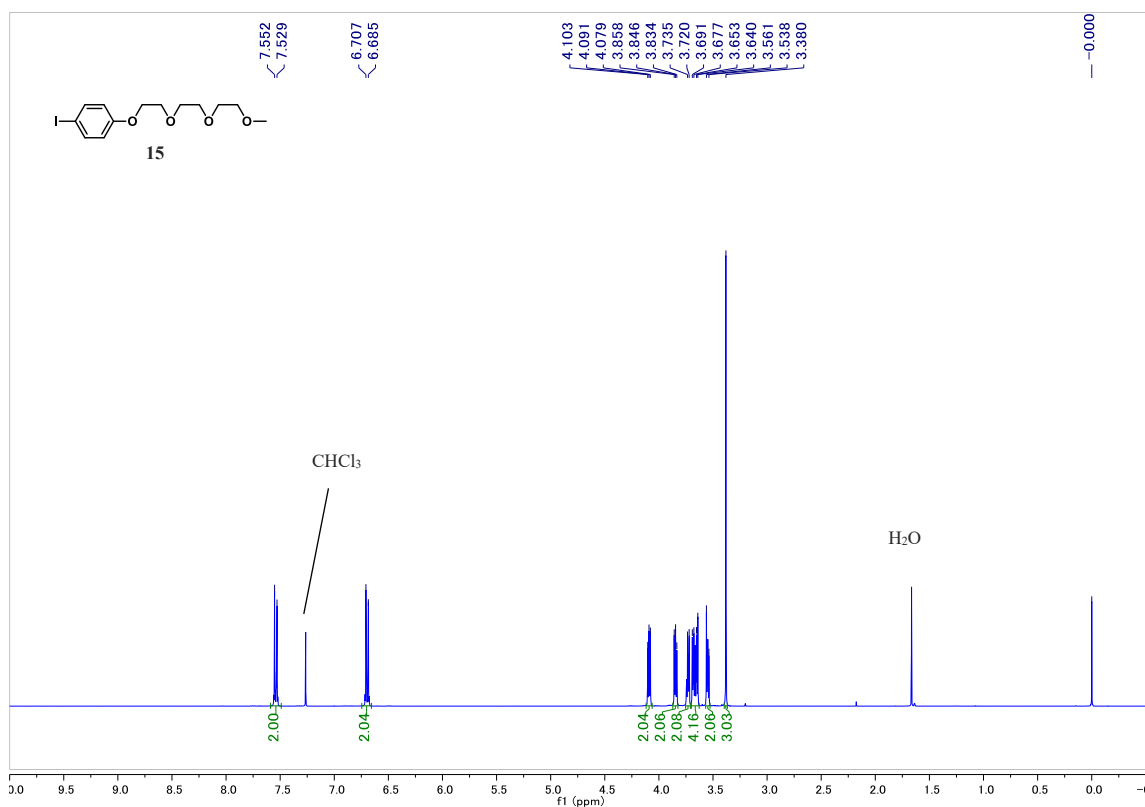

**Fig. S49** <sup>1</sup>H NMR (400 MHz, CDCl<sub>3</sub>) spectrum of compound 15.

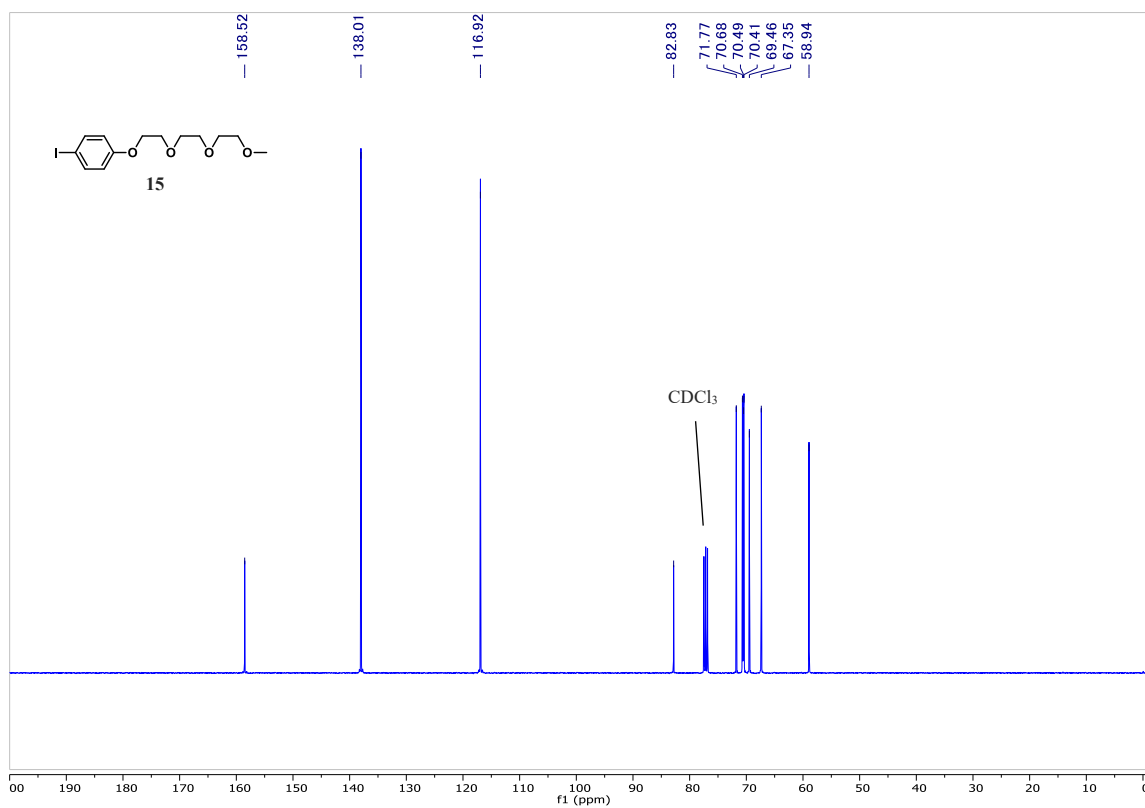

**Fig. S50** <sup>13</sup>C NMR (100 MHz, CDCl<sub>3</sub>) spectrum of compound 15.

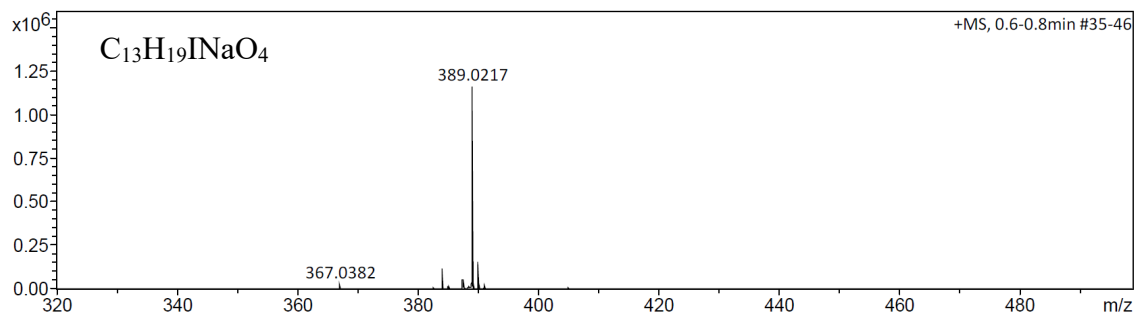

**Fig. S51** High resolution ESI-TOF-MS spectrum of compound **15**.

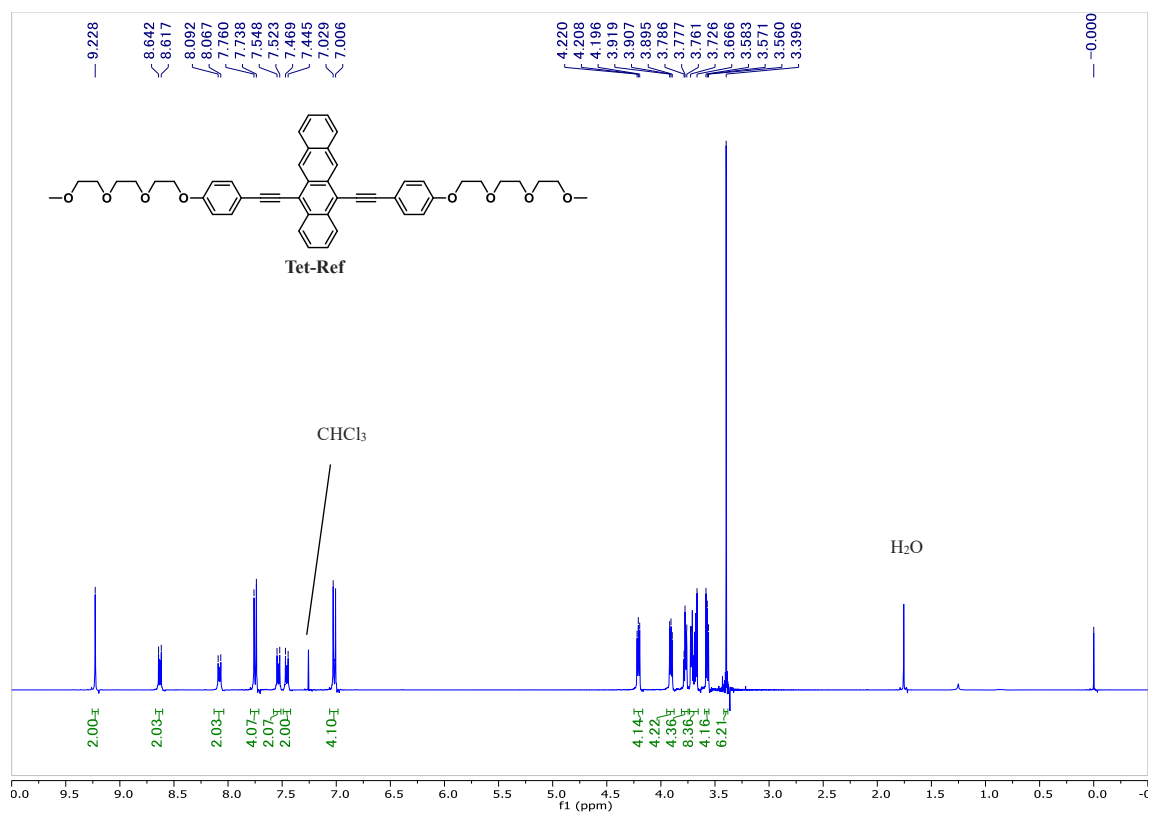

**Fig. S52** <sup>1</sup>H NMR (400 MHz, CDCl<sub>3</sub>) spectrum of **Tet-ref**.

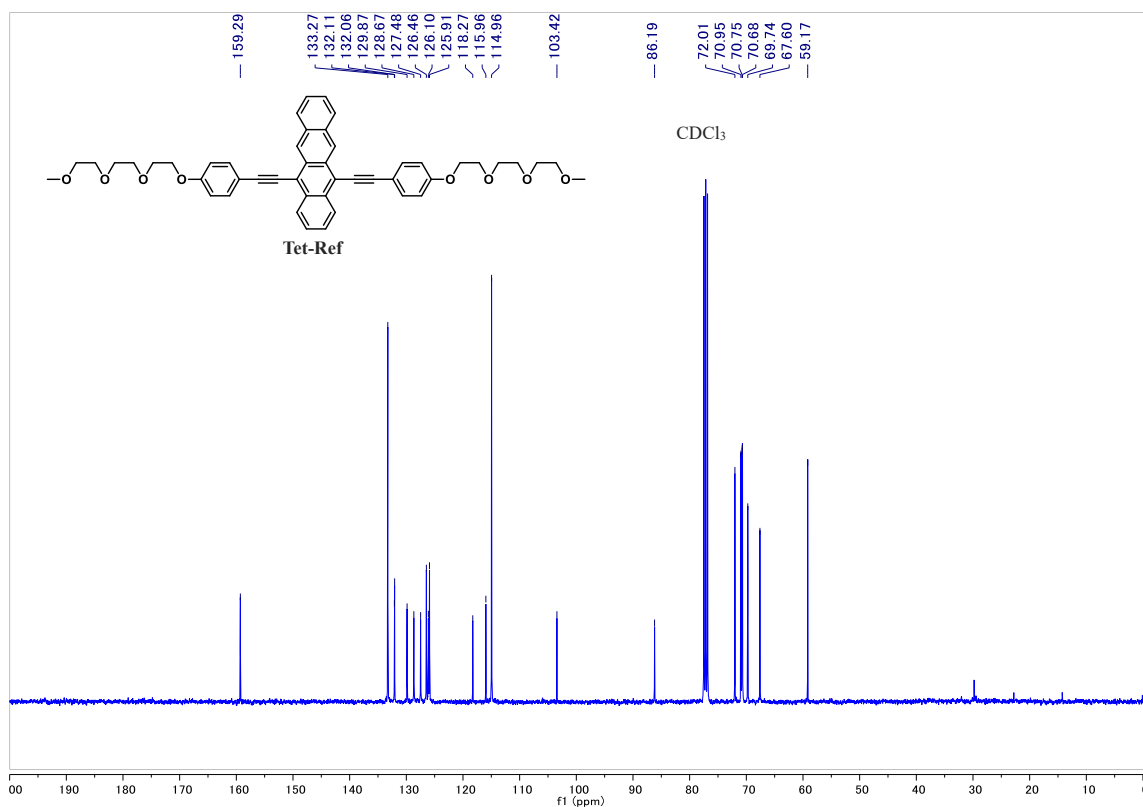

**Fig. S53**  $^{13}\text{C}$  NMR (100 MHz,  $\text{CDCl}_3$ ) spectrum of **Tet-ref**.

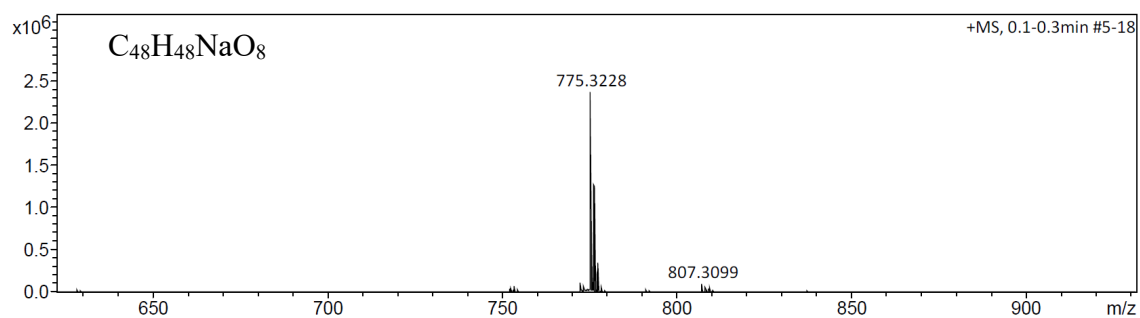

**Fig. S54** High resolution ESI-TOF-MS spectrum of **Tet-ref**.

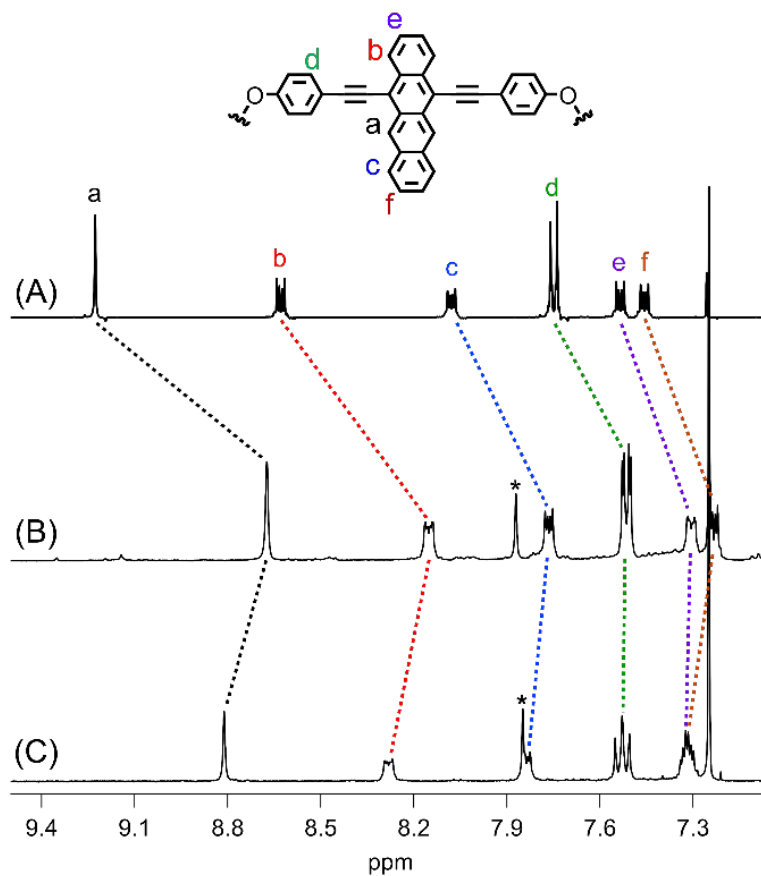

**Fig. S55** <sup>1</sup>H NMR spectra of (A) Tet-ref, (B) (Tet)<sub>2</sub>-CyO<sub>10</sub> and (C) (Tet)<sub>2</sub>-CyO<sub>12</sub> in the range of 7.0-9.5 ppm (protons of phenylene and Tet units) in CDCl<sub>3</sub>. The asterisk (\*) shows the protons of the 1,2,3-triazole unit.

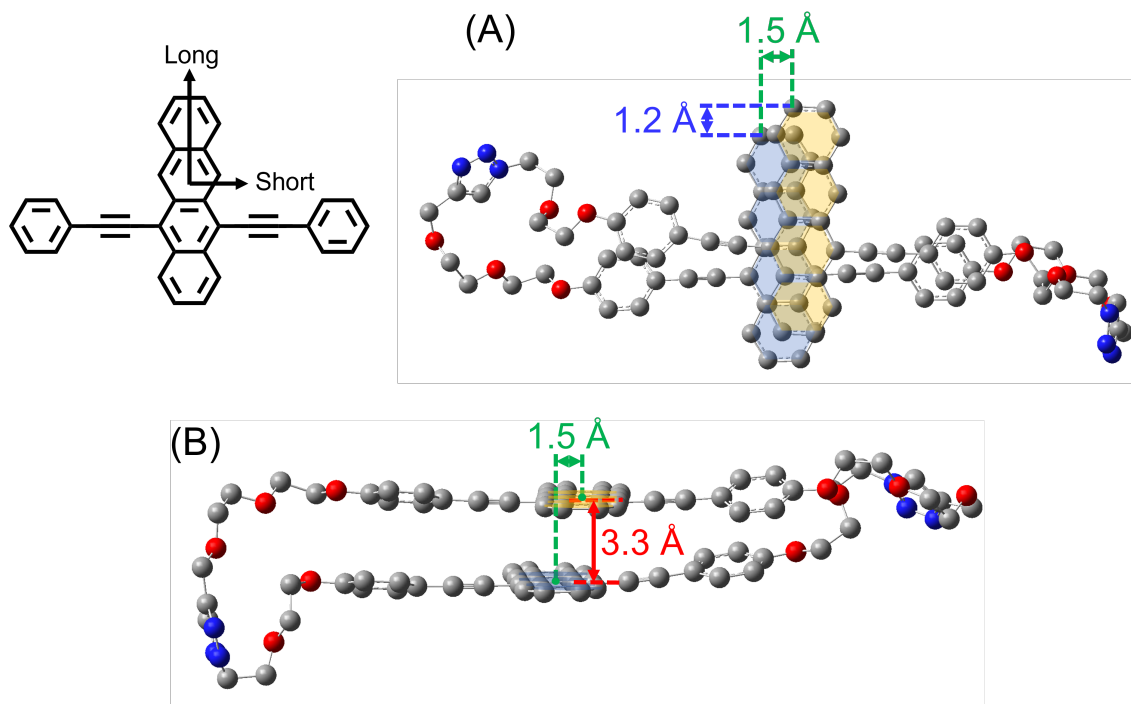

**Fig. S56** The optimized structure of  $(\text{Tet})_2\text{-CyO}_{10}$  calculated by DFT method at the  $\omega\text{B97XD/DGTZVP}$  level. The oxygen and nitrogen atoms are highlighted in red and blue, respectively. The hydrogen atoms are omitted for simplicity. (A) Top view and (B) side view.

The  $\pi$ -stacking distance between two Tet units was estimated to be 3.3 Å (red arrow). The slip distance is 1.5 Å (green arrow) in the direction of short molecular axis, whereas the lateral displacement between the two Tet units is 1.2 Å (blue arrow) along the long molecular axis.

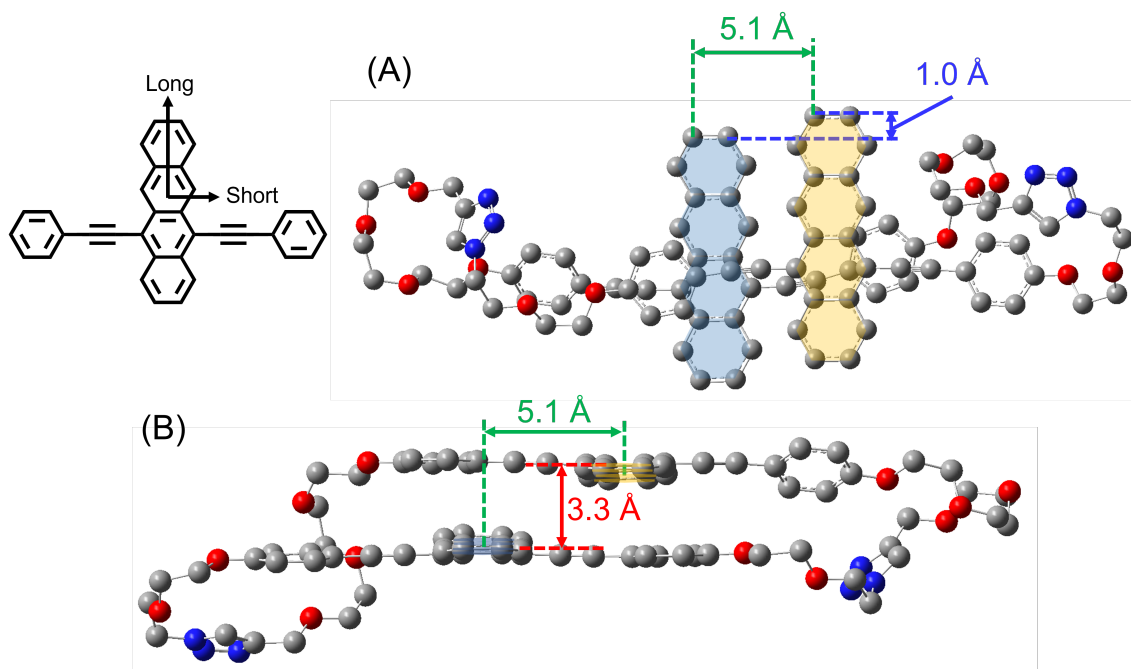

**Fig. S57** The optimized structure of  $(\text{Tet})_2\text{-CyO}_{12}$  calculated by DFT method at the  $\omega\text{B97XD/DGTZVP}$  level. The oxygen and nitrogen atoms are highlighted in red and blue, respectively. The hydrogen atoms are omitted for simplicity. (A) Top view. (B) Side view.

The  $\pi$ -stacking distance between two Tet units was estimated to be 3.3 Å (red arrow). The slip distance is 5.1 Å (green arrow) in the direction of short molecular axis, whereas the lateral displacement between the two Tet units is 1.0 Å (blue arrow) along the long molecular axis.

Cartesian coordinates and energies of (Tet)<sub>2</sub>-CyO<sub>12</sub> optimized by  $\omega$ B97XD/DGTZVP level

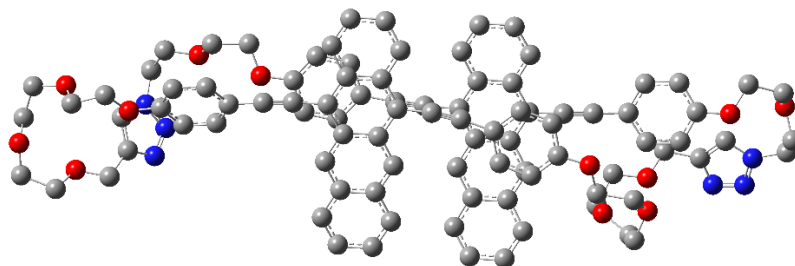

Standard orientation:

| Center Number | Atomic Number | Atomic Type | Coordinates (Angstroms) |           |           |
|---------------|---------------|-------------|-------------------------|-----------|-----------|
|               |               |             | X                       | Y         | Z         |
| 1             | 6             | 0           | 16.630035               | -1.395687 | 0.872444  |
| 2             | 6             | 0           | 16.455991               | -0.367415 | -0.229108 |
| 3             | 8             | 0           | 15.834162               | -1.046618 | -1.356602 |
| 4             | 6             | 0           | 15.430111               | -0.209710 | -2.477735 |
| 5             | 6             | 0           | 14.080076               | -0.690414 | -2.958723 |
| 6             | 8             | 0           | 13.128958               | -0.305586 | -1.925532 |
| 7             | 8             | 0           | 6.221989                | 4.124527  | -0.066770 |
| 8             | 6             | 0           | -3.997604               | 3.004353  | 0.631209  |
| 9             | 6             | 0           | -2.577103               | 3.283670  | 0.636150  |
| 10            | 6             | 0           | -1.779852               | 2.717555  | 1.650526  |
| 11            | 6             | 0           | -2.310075               | 1.896822  | 2.645862  |
| 12            | 6             | 0           | -3.729293               | 1.610304  | 2.636714  |
| 13            | 6             | 0           | -4.525113               | 2.169358  | 1.636318  |
| 14            | 6             | 0           | -1.500091               | 1.325197  | 3.683625  |
| 15            | 6             | 0           | -2.052335               | 0.518910  | 4.642969  |
| 16            | 6             | 0           | -3.454469               | 0.231350  | 4.631063  |
| 17            | 6             | 0           | -4.264240               | 0.760649  | 3.662323  |
| 18            | 6             | 0           | -4.830459               | 3.575799  | -0.388330 |
| 19            | 6             | 0           | -4.270557               | 4.444800  | -1.356479 |
| 20            | 6             | 0           | -2.851148               | 4.718863  | -1.354234 |
| 21            | 6             | 0           | -2.011880               | 4.123265  | -0.381974 |
| 22            | 6             | 0           | -5.078528               | 5.057701  | -2.368860 |

|    |   |   |            |           |           |
|----|---|---|------------|-----------|-----------|
| 23 | 6 | 0 | -4.532959  | 5.886342  | -3.312955 |
| 24 | 6 | 0 | -3.132319  | 6.154101  | -3.312243 |
| 25 | 6 | 0 | -2.322588  | 5.585356  | -2.365746 |
| 26 | 6 | 0 | -0.606552  | 4.309217  | -0.411783 |
| 27 | 6 | 0 | -6.206057  | 3.233911  | -0.422774 |
| 28 | 6 | 0 | 0.608731   | 4.370719  | -0.393779 |
| 29 | 6 | 0 | -7.366176  | 2.866596  | -0.415502 |
| 30 | 6 | 0 | 2.028692   | 4.317151  | -0.316824 |
| 31 | 6 | 0 | -8.691927  | 2.354224  | -0.354841 |
| 32 | 6 | 0 | 2.643568   | 3.208269  | 0.299380  |
| 33 | 6 | 0 | 4.028098   | 3.109711  | 0.397862  |
| 34 | 6 | 0 | 4.829959   | 4.131390  | -0.122143 |
| 35 | 6 | 0 | 4.241966   | 5.243332  | -0.740378 |
| 36 | 6 | 0 | 2.859790   | 5.334965  | -0.838132 |
| 37 | 6 | 0 | -9.762466  | 2.955014  | -1.044262 |
| 38 | 6 | 0 | -11.055663 | 2.433105  | -0.969152 |
| 39 | 6 | 0 | -11.298241 | 1.295264  | -0.190930 |
| 40 | 6 | 0 | -10.245188 | 0.677423  | 0.498058  |
| 41 | 6 | 0 | -8.963661  | 1.197327  | 0.416602  |
| 42 | 8 | 0 | -12.546333 | 0.693685  | -0.036404 |
| 43 | 6 | 0 | 2.939913   | -1.559464 | -0.476202 |
| 44 | 6 | 0 | 4.379381   | -1.448578 | -0.597895 |
| 45 | 6 | 0 | 5.117881   | -0.976069 | 0.505659  |
| 46 | 6 | 0 | 4.512722   | -0.616931 | 1.710841  |
| 47 | 6 | 0 | 3.073921   | -0.737433 | 1.835610  |
| 48 | 6 | 0 | 2.335198   | -1.198323 | 0.744370  |
| 49 | 6 | 0 | 5.268477   | -0.128788 | 2.831464  |
| 50 | 6 | 0 | 4.638281   | 0.209429  | 4.000426  |
| 51 | 6 | 0 | 3.218428   | 0.080761  | 4.129790  |
| 52 | 6 | 0 | 2.462439   | -0.376567 | 3.083200  |
| 53 | 6 | 0 | 2.164425   | -2.024579 | -1.590006 |
| 54 | 6 | 0 | 2.814860   | -2.420943 | -2.787466 |
| 55 | 6 | 0 | 4.250806   | -2.313613 | -2.906658 |
| 56 | 6 | 0 | 5.020623   | -1.812648 | -1.828392 |
| 57 | 6 | 0 | 2.077649   | -2.925193 | -3.907872 |
| 58 | 6 | 0 | 2.703770   | -3.299741 | -5.066814 |



|    |   |   |            |           |           |
|----|---|---|------------|-----------|-----------|
| 59 | 6 | 0 | 4.119771   | -3.188923 | -5.185426 |
| 60 | 6 | 0 | 4.863251   | -2.710203 | -4.139936 |
| 61 | 6 | 0 | 6.422717   | -1.646138 | -1.955403 |
| 62 | 6 | 0 | 0.749540   | -2.054240 | -1.508543 |
| 63 | 6 | 0 | 7.623036   | -1.458589 | -2.027022 |
| 64 | 6 | 0 | -0.467709  | -2.035571 | -1.484896 |
| 65 | 6 | 0 | 9.019646   | -1.187022 | -2.049302 |
| 66 | 6 | 0 | -1.888372  | -1.974619 | -1.525802 |
| 67 | 6 | 0 | 9.591632   | -0.361628 | -1.050676 |
| 68 | 6 | 0 | 10.949117  | -0.084950 | -1.053482 |
| 69 | 6 | 0 | 11.774083  | -0.626515 | -2.045931 |
| 70 | 6 | 0 | 11.235193  | -1.436628 | -3.049918 |
| 71 | 6 | 0 | 9.865401   | -1.710590 | -3.046711 |
| 72 | 6 | 0 | -2.577894  | -2.266731 | -2.719428 |
| 73 | 6 | 0 | -3.964724  | -2.160346 | -2.799415 |
| 74 | 6 | 0 | -4.694917  | -1.755485 | -1.674989 |
| 75 | 6 | 0 | -4.030991  | -1.483451 | -0.470677 |
| 76 | 6 | 0 | -2.650226  | -1.589788 | -0.396534 |
| 77 | 8 | 0 | -6.076118  | -1.583623 | -1.661499 |
| 78 | 6 | 0 | -6.801061  | -1.694876 | -2.920604 |
| 79 | 6 | 0 | -8.251606  | -1.344148 | -2.691896 |
| 80 | 8 | 0 | -8.936574  | -2.481043 | -2.095224 |
| 81 | 6 | 0 | -10.373124 | -2.468616 | -2.296205 |
| 82 | 6 | 0 | -10.962738 | -3.685096 | -1.594792 |
| 83 | 7 | 0 | -11.195995 | -3.496383 | -0.166808 |
| 84 | 6 | 0 | -12.076500 | -2.660952 | 0.454045  |
| 85 | 6 | 0 | -11.934660 | -2.931783 | 1.802201  |
| 86 | 7 | 0 | -10.979713 | -3.918909 | 1.957811  |
| 87 | 7 | 0 | -10.515554 | -4.273571 | 0.763612  |
| 88 | 6 | 0 | -12.667602 | -2.356517 | 2.956302  |
| 89 | 6 | 0 | -14.919106 | 0.456771  | -0.315925 |
| 90 | 6 | 0 | -13.704177 | 1.246808  | -0.731690 |
| 91 | 8 | 0 | -14.097799 | -2.619122 | 2.762470  |
| 92 | 6 | 0 | -15.000862 | -1.769574 | 3.515958  |
| 93 | 6 | 0 | -16.392464 | -1.947998 | 2.938072  |
| 94 | 8 | 0 | -16.493782 | -1.441345 | 1.574839  |

|     |   |   |            |           |           |
|-----|---|---|------------|-----------|-----------|
| 95  | 6 | 0 | -16.159950 | -2.409384 | 0.528155  |
| 96  | 6 | 0 | -16.051746 | -1.676235 | -0.791041 |
| 97  | 8 | 0 | -14.842068 | -0.867081 | -0.920362 |
| 98  | 8 | 0 | 9.115826   | 2.138286  | 1.055501  |
| 99  | 6 | 0 | 9.356378   | 2.275059  | 2.488873  |
| 100 | 6 | 0 | 9.870743   | 0.963682  | 3.026178  |
| 101 | 8 | 0 | 8.750393   | 0.028921  | 3.111313  |
| 102 | 6 | 0 | 9.044254   | -1.228520 | 3.784890  |
| 103 | 6 | 0 | 9.754025   | -2.245292 | 2.914798  |
| 104 | 8 | 0 | 11.141915  | -1.840583 | 2.736776  |
| 105 | 6 | 0 | 6.891233   | 2.975769  | 0.535953  |
| 106 | 6 | 0 | 8.386066   | 3.241709  | 0.442447  |
| 107 | 6 | 0 | 11.956609  | -2.882944 | 2.104348  |
| 108 | 7 | 0 | 15.422544  | -2.182771 | 2.856285  |
| 109 | 7 | 0 | 14.201133  | -2.594976 | 3.167391  |
| 110 | 6 | 0 | 13.378902  | -2.470183 | 2.060937  |
| 111 | 6 | 0 | 14.124396  | -1.958819 | 1.013913  |
| 112 | 7 | 0 | 15.379237  | -1.787473 | 1.520633  |
| 113 | 1 | 0 | 17.266334  | -1.000940 | 1.662519  |
| 114 | 1 | 0 | 17.113766  | -2.279164 | 0.453045  |
| 115 | 1 | 0 | 15.830923  | 0.466843  | 0.102727  |
| 116 | 1 | 0 | 17.440579  | 0.018531  | -0.513861 |
| 117 | 1 | 0 | 16.170367  | -0.294373 | -3.278358 |
| 118 | 1 | 0 | 15.351692  | 0.836156  | -2.171197 |
| 119 | 1 | 0 | 13.815557  | -0.214841 | -3.907889 |
| 120 | 1 | 0 | 14.092948  | -1.774897 | -3.086999 |
| 121 | 1 | 0 | -0.721475  | 2.936557  | 1.660367  |
| 122 | 1 | 0 | -5.586160  | 1.962989  | 1.634906  |
| 123 | 1 | 0 | -0.440568  | 1.549510  | 3.692820  |
| 124 | 1 | 0 | -1.432820  | 0.093920  | 5.421560  |
| 125 | 1 | 0 | -3.869359  | -0.408904 | 5.398021  |
| 126 | 1 | 0 | -5.325750  | 0.546646  | 3.654554  |
| 127 | 1 | 0 | -6.139055  | 4.849893  | -2.369280 |
| 128 | 1 | 0 | -5.163066  | 6.340984  | -4.065987 |
| 129 | 1 | 0 | -2.712447  | 6.807565  | -4.065307 |
| 130 | 1 | 0 | -1.259804  | 5.780968  | -2.363618 |

|     |   |   |            |           |           |
|-----|---|---|------------|-----------|-----------|
| 131 | 1 | 0 | 2.028220   | 2.411378  | 0.692072  |
| 132 | 1 | 0 | 4.458043   | 2.239267  | 0.868035  |
| 133 | 1 | 0 | 4.886042   | 6.015878  | -1.134699 |
| 134 | 1 | 0 | 2.409527   | 6.194566  | -1.314845 |
| 135 | 1 | 0 | -9.578540  | 3.838471  | -1.639844 |
| 136 | 1 | 0 | -11.852499 | 2.917880  | -1.512913 |
| 137 | 1 | 0 | -10.452522 | -0.208691 | 1.079292  |
| 138 | 1 | 0 | -8.152741  | 0.707763  | 0.936673  |
| 139 | 1 | 0 | 6.192661   | -0.897656 | 0.417930  |
| 140 | 1 | 0 | 1.261256   | -1.288398 | 0.835577  |
| 141 | 1 | 0 | 6.344272   | -0.031022 | 2.736330  |
| 142 | 1 | 0 | 5.215042   | 0.576476  | 4.839187  |
| 143 | 1 | 0 | 2.746768   | 0.348066  | 5.066327  |
| 144 | 1 | 0 | 1.388428   | -0.478262 | 3.179791  |
| 145 | 1 | 0 | 1.004836   | -3.008895 | -3.815158 |
| 146 | 1 | 0 | 2.125550   | -3.681668 | -5.897657 |
| 147 | 1 | 0 | 4.604366   | -3.485138 | -6.106336 |
| 148 | 1 | 0 | 5.936743   | -2.622951 | -4.226085 |
| 149 | 1 | 0 | 8.975371   | 0.074379  | -0.278028 |
| 150 | 1 | 0 | 11.380939  | 0.554241  | -0.298685 |
| 151 | 1 | 0 | 11.858664  | -1.856853 | -3.825557 |
| 152 | 1 | 0 | 9.446508   | -2.339249 | -3.820287 |
| 153 | 1 | 0 | -2.016422  | -2.568328 | -3.592859 |
| 154 | 1 | 0 | -4.456288  | -2.390763 | -3.732024 |
| 155 | 1 | 0 | -4.615007  | -1.176192 | 0.383807  |
| 156 | 1 | 0 | -2.145150  | -1.362144 | 0.531403  |
| 157 | 1 | 0 | -6.367246  | -0.997836 | -3.644520 |
| 158 | 1 | 0 | -6.731699  | -2.712652 | -3.310704 |
| 159 | 1 | 0 | -8.703294  | -1.116640 | -3.666510 |
| 160 | 1 | 0 | -8.336067  | -0.464560 | -2.049798 |
| 161 | 1 | 0 | -10.593899 | -2.533521 | -3.369773 |
| 162 | 1 | 0 | -10.814168 | -1.543496 | -1.911894 |
| 163 | 1 | 0 | -10.272148 | -4.519760 | -1.684613 |
| 164 | 1 | 0 | -11.908382 | -3.959179 | -2.065953 |
| 165 | 1 | 0 | -12.718234 | -1.970765 | -0.065606 |
| 166 | 1 | 0 | -12.314609 | -2.823556 | 3.877951  |

|     |   |   |            |           |           |
|-----|---|---|------------|-----------|-----------|
| 167 | 1 | 0 | -12.522047 | -1.272553 | 3.025916  |
| 168 | 1 | 0 | -15.816039 | 0.970697  | -0.683254 |
| 169 | 1 | 0 | -14.985644 | 0.381685  | 0.767630  |
| 170 | 1 | 0 | -13.836186 | 2.295321  | -0.447763 |
| 171 | 1 | 0 | -13.557284 | 1.178546  | -1.812032 |
| 172 | 1 | 0 | -14.693206 | -0.721752 | 3.427187  |
| 173 | 1 | 0 | -14.999393 | -2.046068 | 4.578486  |
| 174 | 1 | 0 | -17.107448 | -1.368758 | 3.522843  |
| 175 | 1 | 0 | -16.681348 | -3.002586 | 2.973178  |
| 176 | 1 | 0 | -15.225276 | -2.909763 | 0.771247  |
| 177 | 1 | 0 | -16.963780 | -3.154457 | 0.457569  |
| 178 | 1 | 0 | -16.935567 | -1.048527 | -0.947006 |
| 179 | 1 | 0 | -15.989757 | -2.402693 | -1.601359 |
| 180 | 1 | 0 | 8.437744   | 2.548805  | 3.014666  |
| 181 | 1 | 0 | 10.104749  | 3.059035  | 2.653366  |
| 182 | 1 | 0 | 10.657233  | 0.556428  | 2.392839  |
| 183 | 1 | 0 | 10.282358  | 1.122060  | 4.030267  |
| 184 | 1 | 0 | 8.070142   | -1.623251 | 4.073021  |
| 185 | 1 | 0 | 9.634465   | -1.042360 | 4.688129  |
| 186 | 1 | 0 | 9.718906   | -3.223632 | 3.413055  |
| 187 | 1 | 0 | 9.253428   | -2.329634 | 1.944495  |
| 188 | 1 | 0 | 6.578757   | 2.867318  | 1.577020  |
| 189 | 1 | 0 | 6.637273   | 2.063175  | -0.005534 |
| 190 | 1 | 0 | 8.701826   | 3.279284  | -0.596916 |
| 191 | 1 | 0 | 8.635968   | 4.192403  | 0.921245  |
| 192 | 1 | 0 | 11.863344  | -3.798921 | 2.696035  |
| 193 | 1 | 0 | 11.580455  | -3.074242 | 1.094710  |
| 194 | 1 | 0 | 13.875370  | -1.703240 | 0.001792  |

-----  
Total Energy : -4861.04759561 Hartree, Imaginary Freq : 0

Cartesian coordinates and energies of (Tet)<sub>2</sub>-CyO<sub>10</sub> optimized by  $\omega$ B97XD/DGTZVP level

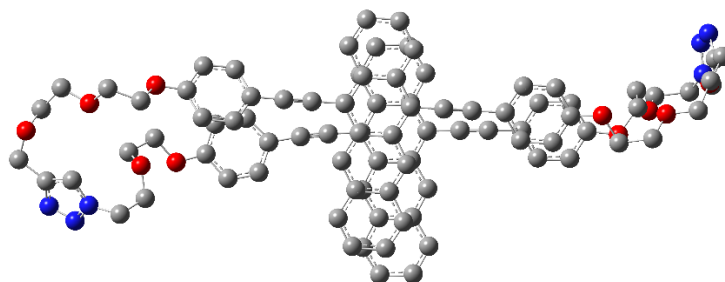

Standard orientation:

| Center Number | Atomic Number | Atomic Type | Coordinates (Angstroms) |          |           |
|---------------|---------------|-------------|-------------------------|----------|-----------|
|               |               |             | X                       | Y        | Z         |
| 1             | 8             | 0           | -9.676218               | 5.270673 | 0.262136  |
| 2             | 8             | 0           | 9.656795                | 5.182666 | 0.588312  |
| 3             | 6             | 0           | 6.158621                | 4.338067 | 1.423099  |
| 4             | 6             | 0           | 7.548607                | 4.344686 | 1.508251  |
| 5             | 6             | 0           | 8.298523                | 5.096404 | 0.593208  |
| 6             | 6             | 0           | 7.637430                | 5.832019 | -0.404774 |
| 7             | 6             | 0           | 6.255282                | 5.821988 | -0.482557 |
| 8             | 6             | 0           | -6.233867               | 5.788376 | -0.740879 |
| 9             | 6             | 0           | -7.617699               | 5.813641 | -0.713667 |
| 10            | 6             | 0           | -8.319762               | 5.178540 | 0.324507  |
| 11            | 6             | 0           | -7.609165               | 4.512359 | 1.332469  |
| 12            | 6             | 0           | -6.217093               | 4.489219 | 1.297526  |
| 13            | 6             | 0           | 5.480530                | 5.074149 | 0.433741  |
| 14            | 6             | 0           | -5.498505               | 5.124728 | 0.268006  |
| 15            | 6             | 0           | 4.061385                | 5.069447 | 0.365263  |
| 16            | 6             | 0           | -4.077852               | 5.103932 | 0.247963  |
| 17            | 6             | 0           | -2.857864               | 5.089771 | 0.239490  |
| 18            | 6             | 0           | 2.842111                | 5.067157 | 0.319369  |
| 19            | 6             | 0           | 1.425302                | 6.732712 | -1.551270 |
| 20            | 6             | 0           | 0.751380                | 7.532601 | -2.434331 |
| 21            | 6             | 0           | -0.672256               | 7.539122 | -2.453116 |
| 22            | 6             | 0           | -1.376617               | 6.745155 | -1.588650 |

|    |   |   |           |           |           |
|----|---|---|-----------|-----------|-----------|
| 23 | 6 | 0 | 1.426319  | 5.062109  | 0.286153  |
| 24 | 6 | 0 | 0.729425  | 5.887375  | -0.631511 |
| 25 | 6 | 0 | -0.713144 | 5.893199  | -0.651223 |
| 26 | 6 | 0 | -1.441659 | 5.073214  | 0.246490  |
| 27 | 6 | 0 | 1.359578  | 3.380271  | 2.106111  |
| 28 | 6 | 0 | 0.699651  | 4.220632  | 1.191493  |
| 29 | 6 | 0 | -0.747160 | 4.226021  | 1.171278  |
| 30 | 6 | 0 | -1.438894 | 3.389695  | 2.066053  |
| 31 | 6 | 0 | 1.337820  | 1.692360  | 3.917263  |
| 32 | 6 | 0 | 0.667663  | 2.552772  | 2.988965  |
| 33 | 6 | 0 | -0.778176 | 2.557380  | 2.968070  |
| 34 | 6 | 0 | -1.480237 | 1.700859  | 3.876281  |
| 35 | 6 | 0 | -0.800864 | 0.893452  | 4.746841  |
| 36 | 6 | 0 | 0.628620  | 0.889187  | 4.767719  |
| 37 | 8 | 0 | -9.644968 | -4.639784 | -0.694553 |
| 38 | 8 | 0 | 9.646816  | -4.580751 | -1.033218 |
| 39 | 6 | 0 | 6.250790  | -4.972229 | 0.170772  |
| 40 | 6 | 0 | 7.627807  | -5.059884 | 0.055217  |
| 41 | 6 | 0 | 8.293617  | -4.413512 | -0.998779 |
| 42 | 6 | 0 | 7.558062  | -3.663842 | -1.926008 |
| 43 | 6 | 0 | 6.173081  | -3.578926 | -1.802943 |
| 44 | 6 | 0 | -6.200596 | -3.716815 | -1.668052 |
| 45 | 6 | 0 | -7.588231 | -3.816805 | -1.739749 |
| 46 | 6 | 0 | -8.292094 | -4.466853 | -0.717482 |
| 47 | 6 | 0 | -7.592166 | -4.998004 | 0.377850  |
| 48 | 6 | 0 | -6.212673 | -4.896669 | 0.441632  |
| 49 | 6 | 0 | 5.488006  | -4.232994 | -0.762151 |
| 50 | 6 | 0 | -5.481803 | -4.257699 | -0.585984 |
| 51 | 6 | 0 | 4.071793  | -4.166662 | -0.664196 |
| 52 | 6 | 0 | -4.063367 | -4.180350 | -0.537967 |
| 53 | 6 | 0 | -2.844559 | -4.131961 | -0.514873 |
| 54 | 6 | 0 | 2.854105  | -4.124459 | -0.601123 |
| 55 | 6 | 0 | 1.376621  | -2.401550 | -2.365238 |
| 56 | 6 | 0 | 0.673301  | -1.594033 | -3.217641 |
| 57 | 6 | 0 | -0.750156 | -1.595114 | -3.195560 |
| 58 | 6 | 0 | -1.425381 | -2.403971 | -2.322013 |

|    |   |   |            |           |           |
|----|---|---|------------|-----------|-----------|
| 59 | 6 | 0 | 1.438788   | -4.095463 | -0.549861 |
| 60 | 6 | 0 | 0.712010   | -3.259863 | -1.434611 |
| 61 | 6 | 0 | -0.730617  | -3.261511 | -1.412795 |
| 62 | 6 | 0 | -1.428234  | -4.098863 | -0.506842 |
| 63 | 6 | 0 | 1.434347   | -5.754895 | 1.291602  |
| 64 | 6 | 0 | 0.743681   | -4.926937 | 0.388309  |
| 65 | 6 | 0 | -0.703240  | -4.928889 | 0.409709  |
| 66 | 6 | 0 | -1.364571  | -5.759866 | 1.331973  |
| 67 | 6 | 0 | 1.473203   | -7.417804 | 3.126012  |
| 68 | 6 | 0 | 0.772407   | -6.574024 | 2.204850  |
| 69 | 6 | 0 | -0.673621  | -6.576808 | 2.225449  |
| 70 | 6 | 0 | -1.344742  | -7.423469 | 3.165815  |
| 71 | 6 | 0 | -0.636657  | -8.215038 | 4.028147  |
| 72 | 6 | 0 | 0.792910   | -8.212097 | 4.007996  |
| 73 | 6 | 0 | -10.452684 | 4.684225  | 1.302341  |
| 74 | 6 | 0 | -11.915765 | 4.936619  | 1.002114  |
| 75 | 8 | 0 | -12.311515 | 4.122939  | -0.079497 |
| 76 | 8 | 0 | -12.436735 | -3.853324 | -0.627401 |
| 77 | 6 | 0 | -11.838828 | -4.673428 | -1.614913 |
| 78 | 6 | 0 | -10.404134 | -4.237562 | -1.828377 |
| 79 | 8 | 0 | 12.306685  | 4.070325  | 0.246545  |
| 80 | 6 | 0 | 11.864792  | 4.776208  | 1.384590  |
| 81 | 6 | 0 | 10.391320  | 4.497859  | 1.598495  |
| 82 | 6 | 0 | 10.374411  | -4.054360 | -2.136630 |
| 83 | 6 | 0 | 11.816368  | -4.497997 | -2.002016 |
| 84 | 8 | 0 | 12.430737  | -3.781083 | -0.946490 |
| 85 | 7 | 0 | -14.715989 | -2.037881 | -0.060607 |
| 86 | 6 | 0 | -14.348005 | -3.245509 | 0.662974  |
| 87 | 6 | 0 | -13.720990 | -4.302002 | -0.237715 |
| 88 | 6 | 0 | -13.644142 | 4.362446  | -0.490758 |
| 89 | 6 | 0 | -14.025936 | 3.359280  | -1.560228 |
| 90 | 6 | 0 | 14.080257  | 3.452312  | -1.231650 |
| 91 | 6 | 0 | 13.653152  | 4.349238  | -0.087544 |
| 92 | 6 | 0 | 13.711109  | -4.280210 | -0.608289 |
| 93 | 6 | 0 | 14.353512  | -3.323585 | 0.387943  |
| 94 | 7 | 0 | 14.740643  | -2.058329 | -0.217524 |

|     |   |   |            |           |           |
|-----|---|---|------------|-----------|-----------|
| 95  | 7 | 0 | -16.015124 | -1.828520 | -0.393221 |
| 96  | 7 | 0 | -16.067741 | -0.717139 | -1.071317 |
| 97  | 6 | 0 | -14.808913 | -0.199912 | -1.194209 |
| 98  | 6 | 0 | -13.931152 | -1.046914 | -0.548534 |
| 99  | 6 | 0 | 13.970311  | -1.019962 | -0.623326 |
| 100 | 6 | 0 | 14.863765  | -0.125063 | -1.176234 |
| 101 | 7 | 0 | 16.116812  | -0.662121 | -1.083536 |
| 102 | 7 | 0 | 16.046040  | -1.830550 | -0.511162 |
| 103 | 8 | 0 | -14.198216 | 2.089981  | -0.961833 |
| 104 | 8 | 0 | 14.239414  | 2.132853  | -0.749224 |
| 105 | 6 | 0 | 14.631829  | 1.224809  | -1.771161 |
| 106 | 6 | 0 | -14.557092 | 1.088487  | -1.905823 |
| 107 | 1 | 0 | 5.583351   | 3.755642  | 2.136244  |
| 108 | 1 | 0 | 8.033323   | 3.764862  | 2.285030  |
| 109 | 1 | 0 | 8.235759   | 6.405722  | -1.105498 |
| 110 | 1 | 0 | 5.753567   | 6.395949  | -1.255563 |
| 111 | 1 | 0 | -5.700117  | 6.283101  | -1.546511 |
| 112 | 1 | 0 | -8.186093  | 6.321858  | -1.486188 |
| 113 | 1 | 0 | -8.126091  | 4.011825  | 2.142847  |
| 114 | 1 | 0 | -5.672159  | 3.973942  | 2.082560  |
| 115 | 1 | 0 | 2.509914   | 6.724630  | -1.531560 |
| 116 | 1 | 0 | 1.302096   | 8.166644  | -3.123967 |
| 117 | 1 | 0 | -1.198740  | 8.178506  | -3.156604 |
| 118 | 1 | 0 | -2.461381  | 6.747445  | -1.597347 |
| 119 | 1 | 0 | 2.445027   | 3.376622  | 2.117612  |
| 120 | 1 | 0 | -2.524250  | 3.393073  | 2.046008  |
| 121 | 1 | 0 | 2.425144   | 1.689643  | 3.928670  |
| 122 | 1 | 0 | -2.567428  | 1.704535  | 3.856041  |
| 123 | 1 | 0 | -1.344571  | 0.245705  | 5.429200  |
| 124 | 1 | 0 | 1.148344   | 0.238321  | 5.465614  |
| 125 | 1 | 0 | 5.743698   | -5.481022 | 0.984715  |
| 126 | 1 | 0 | 8.216004   | -5.631749 | 0.765973  |
| 127 | 1 | 0 | 8.048651   | -3.145401 | -2.741684 |
| 128 | 1 | 0 | 5.607603   | -3.001360 | -2.527633 |
| 129 | 1 | 0 | -5.659577  | -3.218165 | -2.466293 |
| 130 | 1 | 0 | -8.105779  | -3.388527 | -2.590479 |



|     |   |   |            |           |           |
|-----|---|---|------------|-----------|-----------|
| 131 | 1 | 0 | -8.156083  | -5.493172 | 1.162065  |
| 132 | 1 | 0 | -5.678971  | -5.315859 | 1.288961  |
| 133 | 1 | 0 | 2.461219   | -2.400749 | -2.374952 |
| 134 | 1 | 0 | 1.200361   | -0.945190 | -3.911752 |
| 135 | 1 | 0 | -1.299504  | -0.946838 | -3.872709 |
| 136 | 1 | 0 | -2.509789  | -2.404697 | -2.297738 |
| 137 | 1 | 0 | 2.519823   | -5.751537 | 1.272689  |
| 138 | 1 | 0 | -2.450138  | -5.761109 | 1.343806  |
| 139 | 1 | 0 | 2.560476   | -7.413541 | 3.107882  |
| 140 | 1 | 0 | -2.432099  | -7.423613 | 3.178197  |
| 141 | 1 | 0 | -1.157384  | -8.853705 | 4.736566  |
| 142 | 1 | 0 | 1.336005   | -8.848480 | 4.701524  |
| 143 | 1 | 0 | -10.192202 | 5.136313  | 2.270121  |
| 144 | 1 | 0 | -10.269740 | 3.603083  | 1.357069  |
| 145 | 1 | 0 | -12.508215 | 4.703871  | 1.903951  |
| 146 | 1 | 0 | -12.061694 | 6.005064  | 0.772223  |
| 147 | 1 | 0 | -11.852881 | -5.730302 | -1.306719 |
| 148 | 1 | 0 | -12.386992 | -4.589749 | -2.567933 |
| 149 | 1 | 0 | -10.012145 | -4.714973 | -2.737640 |
| 150 | 1 | 0 | -10.359759 | -3.147763 | -1.959080 |
| 151 | 1 | 0 | 12.420603  | 4.456858  | 2.283223  |
| 152 | 1 | 0 | 12.016819  | 5.861691  | 1.264973  |
| 153 | 1 | 0 | 10.208907  | 3.416703  | 1.541369  |
| 154 | 1 | 0 | 10.089486  | 4.854866  | 2.593591  |
| 155 | 1 | 0 | 9.963825   | -4.437374 | -3.081699 |
| 156 | 1 | 0 | 10.319307  | -2.957349 | -2.150810 |
| 157 | 1 | 0 | 12.343416  | -4.311496 | -2.952350 |
| 158 | 1 | 0 | 11.842501  | -5.581017 | -1.806085 |
| 159 | 1 | 0 | -15.271430 | -3.628902 | 1.102867  |
| 160 | 1 | 0 | -13.653041 | -2.984572 | 1.466899  |
| 161 | 1 | 0 | -14.366112 | -4.467133 | -1.114920 |
| 162 | 1 | 0 | -13.647561 | -5.252935 | 0.315091  |
| 163 | 1 | 0 | -13.743613 | 5.383783  | -0.896651 |
| 164 | 1 | 0 | -14.339940 | 4.266734  | 0.358494  |
| 165 | 1 | 0 | -13.239975 | 3.330050  | -2.333046 |
| 166 | 1 | 0 | -14.961306 | 3.689707  | -2.044348 |

|     |   |   |            |           |           |
|-----|---|---|------------|-----------|-----------|
| 167 | 1 | 0 | 13.322567  | 3.493160  | -2.031692 |
| 168 | 1 | 0 | 15.030111  | 3.829622  | -1.648672 |
| 169 | 1 | 0 | 13.763496  | 5.404550  | -0.390680 |
| 170 | 1 | 0 | 14.316090  | 4.174093  | 0.775228  |
| 171 | 1 | 0 | 14.351322  | -4.367723 | -1.500147 |
| 172 | 1 | 0 | 13.627441  | -5.279243 | -0.149877 |
| 173 | 1 | 0 | 15.271100  | -3.760227 | 0.788660  |
| 174 | 1 | 0 | 13.661801  | -3.130653 | 1.213667  |
| 175 | 1 | 0 | -12.862733 | -1.030386 | -0.403790 |
| 176 | 1 | 0 | 12.900055  | -1.007972 | -0.492720 |
| 177 | 1 | 0 | 13.852861  | 1.184475  | -2.551138 |
| 178 | 1 | 0 | 15.566537  | 1.554053  | -2.250097 |
| 179 | 1 | 0 | -15.475440 | 1.368962  | -2.443838 |
| 180 | 1 | 0 | -13.753161 | 0.976318  | -2.652745 |

---

Total Energy : -4553.43772269 Hartree, Imaginary Freq : 0

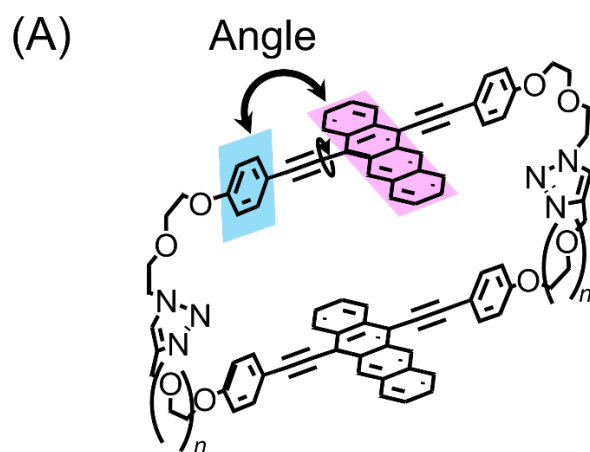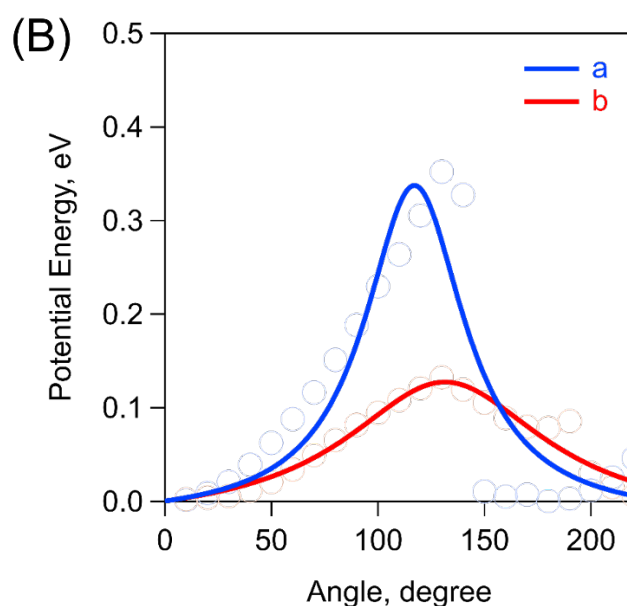

**Fig. S58** (A) Schematic illustration of the dihedral angle between a tetracene and phenylene units in  $(\text{Tet})_2\text{-CyO}_n$ . The potential energies were calculated by changing the dihedral angle between tetracene (pink) and phenylene (light blue) units. (B) Potential energies landscape scanning over rotation of one pentacene–phenylene dihedral angles of (a)  $(\text{Tet})_2\text{-CyO}_{10}$  (blue) and (b)  $(\text{Tet})_2\text{-CyO}_{12}$  (red) calculated with Gaussian 09 using DFT method at the B3LYP/6-31G level. The horizontal axis represents the dihedral angle differences from the optimized geometries between tetracene and phenylene units. Therefore, the difference of  $0^\circ$  in the dihedral angle correspond to the optimized structures.

The rotational barriers of  $(\text{Tet})_2\text{-CyO}_n$  are defined as the difference between the lowest and highest energy states when rotating the dihedral angle between tetracene and phenylene units in the range of  $0^\circ$  to  $220^\circ$  from the optimized structure. As an example,

for (Tet)<sub>2</sub>-CyO<sub>12</sub>, the relative energy for rotation increased with increasing the angles, attaining a maximum value of 0.13 eV at 130° rotation, which corresponds to the rotational barrier. In contrast, the rotational barrier in (Tet)<sub>2</sub>-CyO<sub>10</sub> was calculated to be 0.34 eV at 120°. The smaller rotational barrier in (Tet)<sub>2</sub>-CyO<sub>12</sub> relative to (Tet)<sub>2</sub>-CyO<sub>10</sub> suggests that the conformational flexibility of (Tet)<sub>2</sub>-CyO<sub>12</sub> is larger than that of (Tet)<sub>2</sub>-CyO<sub>10</sub>. The similar discussion was performed in previous work (See: ref. 13 in the text).

Cartesian coordinates of (Tet)<sub>2</sub>-CyO<sub>12</sub> at 0 degree calculated with Gaussian 09 using DFT method at the B3LYP/6-31G level.

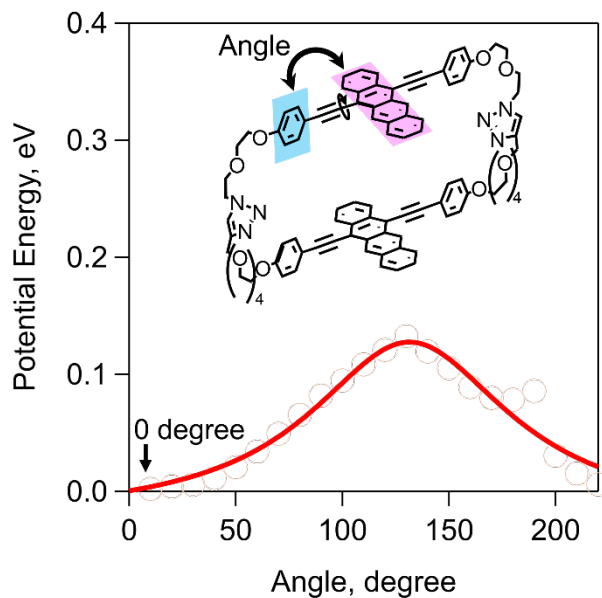

Optimized structure of (Tet)<sub>2</sub>-CyO<sub>12</sub> at 0 degree

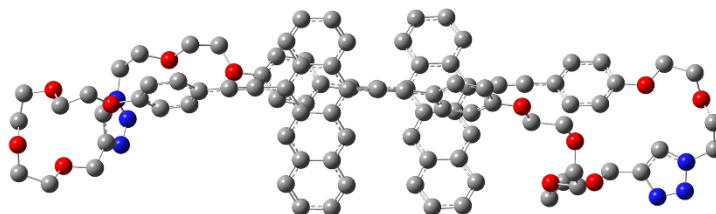

Standard orientation:

| Center Number | Atomic Number | Atomic Type | Coordinates (Angstroms) |           |           |
|---------------|---------------|-------------|-------------------------|-----------|-----------|
|               |               |             | X                       | Y         | Z         |
| 1             | 6             | 0           | 15.294804               | 0.908397  | 2.267424  |
| 2             | 6             | 0           | 15.402902               | -0.163830 | 1.200061  |
| 3             | 8             | 0           | 14.996594               | -1.399458 | 1.763293  |
| 4             | 6             | 0           | 14.827768               | -2.453320 | 0.832158  |
| 5             | 6             | 0           | 13.362091               | -2.811999 | 0.704132  |
| 6             | 8             | 0           | 12.698801               | -1.698088 | 0.134139  |
| 7             | 8             | 0           | 6.975147                | -0.525813 | -3.103832 |
| 8             | 6             | 0           | -3.106344               | -0.616906 | -1.983740 |
| 9             | 6             | 0           | -1.676596               | -0.675419 | -2.086827 |

|    |   |   |            |           |           |
|----|---|---|------------|-----------|-----------|
| 10 | 6 | 0 | -0.955377  | 0.520921  | -2.240754 |
| 11 | 6 | 0 | -1.586375  | 1.753908  | -2.282469 |
| 12 | 6 | 0 | -3.020221  | 1.813808  | -2.189823 |
| 13 | 6 | 0 | -3.741251  | 0.636137  | -2.058372 |
| 14 | 6 | 0 | -0.847185  | 2.978430  | -2.404018 |
| 15 | 6 | 0 | -1.487977  | 4.179119  | -2.416696 |
| 16 | 6 | 0 | -2.917092  | 4.241553  | -2.315807 |
| 17 | 6 | 0 | -3.655151  | 3.101865  | -2.211809 |
| 18 | 6 | 0 | -3.840167  | -1.817671 | -1.762199 |
| 19 | 6 | 0 | -3.170542  | -3.036338 | -1.590513 |
| 20 | 6 | 0 | -1.739936  | -3.094206 | -1.697264 |
| 21 | 6 | 0 | -1.012316  | -1.932436 | -1.984873 |
| 22 | 6 | 0 | -3.878342  | -4.241312 | -1.271235 |
| 23 | 6 | 0 | -3.215297  | -5.411631 | -1.057605 |
| 24 | 6 | 0 | -1.790186  | -5.467383 | -1.162009 |
| 25 | 6 | 0 | -1.081083  | -4.348853 | -1.479454 |
| 26 | 6 | 0 | 0.398699   | -1.960772 | -2.168334 |
| 27 | 6 | 0 | -5.259789  | -1.740723 | -1.654834 |
| 28 | 6 | 0 | 1.590653   | -1.845924 | -2.366810 |
| 29 | 6 | 0 | -6.459661  | -1.589652 | -1.552197 |
| 30 | 6 | 0 | 2.966675   | -1.533392 | -2.588203 |
| 31 | 6 | 0 | -7.848005  | -1.307378 | -1.355479 |
| 32 | 6 | 0 | 3.323695   | -0.195170 | -2.784655 |
| 33 | 6 | 0 | 4.649123   | 0.179667  | -2.959606 |
| 34 | 6 | 0 | 5.649945   | -0.794001 | -2.949460 |
| 35 | 6 | 0 | 5.304710   | -2.140196 | -2.768857 |
| 36 | 6 | 0 | 3.981702   | -2.504549 | -2.586775 |
| 37 | 6 | 0 | -8.850373  | -2.194326 | -1.754756 |
| 38 | 6 | 0 | -10.196456 | -1.909760 | -1.524651 |
| 39 | 6 | 0 | -10.552380 | -0.715453 | -0.891694 |
| 40 | 6 | 0 | -9.554839  | 0.182524  | -0.488356 |
| 41 | 6 | 0 | -8.224796  | -0.111056 | -0.717673 |
| 42 | 8 | 0 | -11.830474 | -0.338692 | -0.620631 |
| 43 | 6 | 0 | 2.445383   | 0.422549  | 0.537786  |
| 44 | 6 | 0 | 3.873953   | 0.338096  | 0.415197  |
| 45 | 6 | 0 | 4.592084   | 1.486610  | 0.035131  |

|    |   |   |            |           |           |
|----|---|---|------------|-----------|-----------|
| 46 | 6 | 0 | 3.951385   | 2.681857  | -0.258126 |
| 47 | 6 | 0 | 2.523859   | 2.776129  | -0.098700 |
| 48 | 6 | 0 | 1.809087   | 1.655020  | 0.298181  |
| 49 | 6 | 0 | 4.669151   | 3.827757  | -0.746098 |
| 50 | 6 | 0 | 4.015581   | 4.990684  | -1.019092 |
| 51 | 6 | 0 | 2.600186   | 5.099223  | -0.815963 |
| 52 | 6 | 0 | 1.881387   | 4.031723  | -0.372159 |
| 53 | 6 | 0 | 1.698449   | -0.744340 | 0.858294  |
| 54 | 6 | 0 | 2.339334   | -1.989117 | 0.965587  |
| 55 | 6 | 0 | 3.764761   | -2.074651 | 0.840213  |
| 56 | 6 | 0 | 4.520273   | -0.914393 | 0.605505  |
| 57 | 6 | 0 | 1.592672   | -3.196880 | 1.160833  |
| 58 | 6 | 0 | 2.213551   | -4.406764 | 1.222635  |
| 59 | 6 | 0 | 3.634764   | -4.491803 | 1.107597  |
| 60 | 6 | 0 | 4.380356   | -3.365973 | 0.929096  |
| 61 | 6 | 0 | 5.938392   | -1.007753 | 0.512879  |
| 62 | 6 | 0 | 0.289361   | -0.668618 | 1.037248  |
| 63 | 6 | 0 | 7.143941   | -1.135953 | 0.448451  |
| 64 | 6 | 0 | -0.913134  | -0.673591 | 1.201549  |
| 65 | 6 | 0 | 8.560548   | -1.310729 | 0.371023  |
| 66 | 6 | 0 | -2.325160  | -0.794302 | 1.373229  |
| 67 | 6 | 0 | 9.388691   | -0.242226 | -0.005445 |
| 68 | 6 | 0 | 10.759401  | -0.404380 | -0.087324 |
| 69 | 6 | 0 | 11.337602  | -1.639073 | 0.218621  |
| 70 | 6 | 0 | 10.529044  | -2.716630 | 0.591535  |
| 71 | 6 | 0 | 9.149140   | -2.546122 | 0.663953  |
| 72 | 6 | 0 | -2.879500  | -2.053910 | 1.622837  |
| 73 | 6 | 0 | -4.251581  | -2.223216 | 1.762154  |
| 74 | 6 | 0 | -5.100011  | -1.118737 | 1.642192  |
| 75 | 6 | 0 | -4.554945  | 0.150773  | 1.406280  |
| 76 | 6 | 0 | -3.187720  | 0.310649  | 1.273010  |
| 77 | 8 | 0 | -6.452818  | -1.180825 | 1.718509  |
| 78 | 6 | 0 | -7.033160  | -2.423590 | 2.062679  |
| 79 | 6 | 0 | -8.539027  | -2.311123 | 2.037416  |
| 80 | 8 | 0 | -8.973670  | -1.328238 | 2.948770  |
| 81 | 6 | 0 | -10.368128 | -1.343417 | 3.126409  |

|     |   |   |            |           |           |
|-----|---|---|------------|-----------|-----------|
| 82  | 6 | 0 | -10.792819 | -0.061337 | 3.826076  |
| 83  | 7 | 0 | -10.933807 | 1.061032  | 2.915784  |
| 84  | 6 | 0 | -11.916245 | 1.264984  | 2.012228  |
| 85  | 6 | 0 | -11.583117 | 2.460636  | 1.422662  |
| 86  | 7 | 0 | -10.432865 | 2.914293  | 1.987749  |
| 87  | 7 | 0 | -10.039288 | 2.061142  | 2.892094  |
| 88  | 6 | 0 | -12.290254 | 3.168030  | 0.316586  |
| 89  | 6 | 0 | -14.196641 | -0.518988 | -0.672050 |
| 90  | 6 | 0 | -12.891043 | -1.180420 | -1.041726 |
| 91  | 8 | 0 | -13.681066 | 3.088094  | 0.567948  |
| 92  | 6 | 0 | -14.493344 | 3.483538  | -0.512065 |
| 93  | 6 | 0 | -15.933851 | 3.134947  | -0.180467 |
| 94  | 8 | 0 | -16.135577 | 1.737744  | -0.071360 |
| 95  | 6 | 0 | -15.961332 | 1.213198  | 1.237958  |
| 96  | 6 | 0 | -15.707008 | -0.279759 | 1.158145  |
| 97  | 8 | 0 | -14.402961 | -0.633344 | 0.725321  |
| 98  | 8 | 0 | 9.559324   | 1.774161  | -2.268505 |
| 99  | 6 | 0 | 9.132851   | 3.124164  | -2.279903 |
| 100 | 6 | 0 | 9.017454   | 3.620200  | -0.854533 |
| 101 | 8 | 0 | 7.880658   | 3.013534  | -0.252125 |
| 102 | 6 | 0 | 7.692867   | 3.349963  | 1.115721  |
| 103 | 6 | 0 | 8.289700   | 2.337315  | 2.070271  |
| 104 | 8 | 0 | 9.693196   | 2.343380  | 1.932072  |
| 105 | 6 | 0 | 7.389548   | 0.820465  | -2.921981 |
| 106 | 6 | 0 | 8.904882   | 0.881571  | -3.146102 |
| 107 | 6 | 0 | 10.342096  | 1.537689  | 2.895133  |
| 108 | 7 | 0 | 13.726067  | 2.704953  | 2.638990  |
| 109 | 7 | 0 | 12.451441  | 2.883208  | 2.812696  |
| 110 | 6 | 0 | 11.820032  | 1.678716  | 2.739807  |
| 111 | 6 | 0 | 12.770009  | 0.707890  | 2.522244  |
| 112 | 7 | 0 | 13.936767  | 1.388420  | 2.464640  |
| 113 | 1 | 0 | 15.878244  | 1.783644  | 1.981751  |
| 114 | 1 | 0 | 15.690643  | 0.520780  | 3.209454  |
| 115 | 1 | 0 | 14.780122  | 0.097754  | 0.336431  |
| 116 | 1 | 0 | 16.448987  | -0.229052 | 0.871578  |
| 117 | 1 | 0 | 15.375235  | -3.326932 | 1.200156  |



|     |   |   |            |           |           |
|-----|---|---|------------|-----------|-----------|
| 118 | 1 | 0 | 15.235413  | -2.185233 | -0.148705 |
| 119 | 1 | 0 | 13.244326  | -3.703474 | 0.074149  |
| 120 | 1 | 0 | 12.957832  | -3.027778 | 1.700471  |
| 121 | 1 | 0 | 0.127064   | 0.476626  | -2.296774 |
| 122 | 1 | 0 | -4.822300  | 0.681907  | -1.973556 |
| 123 | 1 | 0 | 0.235525   | 2.927448  | -2.484227 |
| 124 | 1 | 0 | -0.919710  | 5.099862  | -2.507451 |
| 125 | 1 | 0 | -3.408242  | 5.209436  | -2.326181 |
| 126 | 1 | 0 | -4.737944  | 3.150674  | -2.137104 |
| 127 | 1 | 0 | -4.959684  | -4.197782 | -1.190026 |
| 128 | 1 | 0 | -3.767882  | -6.312255 | -0.808092 |
| 129 | 1 | 0 | -1.276937  | -6.408290 | -0.990427 |
| 130 | 1 | 0 | 0.001019   | -4.384199 | -1.559604 |
| 131 | 1 | 0 | 2.555810   | 0.571618  | -2.767832 |
| 132 | 1 | 0 | 4.877368   | 1.231761  | -3.071916 |
| 133 | 1 | 0 | 6.097076   | -2.880322 | -2.746264 |
| 134 | 1 | 0 | 3.726507   | -3.545137 | -2.415989 |
| 135 | 1 | 0 | -8.577556  | -3.121184 | -2.248757 |
| 136 | 1 | 0 | -10.946026 | -2.623433 | -1.845171 |
| 137 | 1 | 0 | -9.837460  | 1.099365  | 0.016668  |
| 138 | 1 | 0 | -7.458120  | 0.573336  | -0.373248 |
| 139 | 1 | 0 | 5.669588   | 1.418630  | -0.086808 |
| 140 | 1 | 0 | 0.729660   | 1.719297  | 0.406201  |
| 141 | 1 | 0 | 5.741970   | 3.737010  | -0.899601 |
| 142 | 1 | 0 | 4.564866   | 5.850040  | -1.391338 |
| 143 | 1 | 0 | 2.104580   | 6.043378  | -1.019746 |
| 144 | 1 | 0 | 0.808416   | 4.110770  | -0.221514 |
| 145 | 1 | 0 | 0.513110   | -3.129325 | 1.236833  |
| 146 | 1 | 0 | 1.629526   | -5.311949 | 1.356561  |
| 147 | 1 | 0 | 4.119831   | -5.461607 | 1.160262  |
| 148 | 1 | 0 | 5.458100   | -3.432294 | 0.829569  |
| 149 | 1 | 0 | 8.959034   | 0.725067  | -0.235934 |
| 150 | 1 | 0 | 11.390881  | 0.428383  | -0.376427 |
| 151 | 1 | 0 | 10.953704  | -3.688465 | 0.814624  |
| 152 | 1 | 0 | 8.521457   | -3.383064 | 0.952488  |
| 153 | 1 | 0 | -2.227635  | -2.919403 | 1.686460  |

|     |   |   |            |           |           |
|-----|---|---|------------|-----------|-----------|
| 154 | 1 | 0 | -4.636895  | -3.219569 | 1.938035  |
| 155 | 1 | 0 | -5.227817  | 0.997933  | 1.326456  |
| 156 | 1 | 0 | -2.775507  | 1.293991  | 1.071637  |
| 157 | 1 | 0 | -6.746556  | -3.195560 | 1.336552  |
| 158 | 1 | 0 | -6.693346  | -2.727837 | 3.060645  |
| 159 | 1 | 0 | -8.942359  | -3.300083 | 2.308869  |
| 160 | 1 | 0 | -8.888527  | -2.071402 | 1.026929  |
| 161 | 1 | 0 | -10.663424 | -2.205682 | 3.744145  |
| 162 | 1 | 0 | -10.889337 | -1.429658 | 2.161352  |
| 163 | 1 | 0 | -10.047845 | 0.218370  | 4.570749  |
| 164 | 1 | 0 | -11.751903 | -0.212212 | 4.326195  |
| 165 | 1 | 0 | -12.725280 | 0.569811  | 1.832303  |
| 166 | 1 | 0 | -11.951958 | 4.210842  | 0.266266  |
| 167 | 1 | 0 | -12.062580 | 2.685510  | -0.645847 |
| 168 | 1 | 0 | -15.010908 | -1.023016 | -1.211533 |
| 169 | 1 | 0 | -14.183710 | 0.529604  | -0.983628 |
| 170 | 1 | 0 | -12.853284 | -1.314733 | -2.130127 |
| 171 | 1 | 0 | -12.819051 | -2.162132 | -0.558149 |
| 172 | 1 | 0 | -14.193587 | 2.958822  | -1.431784 |
| 173 | 1 | 0 | -14.407860 | 4.566022  | -0.695547 |
| 174 | 1 | 0 | -16.577846 | 3.486083  | -0.991287 |
| 175 | 1 | 0 | -16.238772 | 3.646542  | 0.741022  |
| 176 | 1 | 0 | -15.121321 | 1.696728  | 1.743697  |
| 177 | 1 | 0 | -16.875735 | 1.383205  | 1.826888  |
| 178 | 1 | 0 | -16.461606 | -0.750400 | 0.512599  |
| 179 | 1 | 0 | -15.807935 | -0.702617 | 2.160921  |
| 180 | 1 | 0 | 8.165268   | 3.244020  | -2.780310 |
| 181 | 1 | 0 | 9.867159   | 3.737578  | -2.818051 |
| 182 | 1 | 0 | 9.926311   | 3.372010  | -0.296779 |
| 183 | 1 | 0 | 8.895898   | 4.713180  | -0.861867 |
| 184 | 1 | 0 | 6.612888   | 3.392251  | 1.288237  |
| 185 | 1 | 0 | 8.109639   | 4.342984  | 1.323051  |
| 186 | 1 | 0 | 7.999803   | 2.617789  | 3.095415  |
| 187 | 1 | 0 | 7.878460   | 1.337347  | 1.866376  |
| 188 | 1 | 0 | 6.866728   | 1.474623  | -3.628502 |
| 189 | 1 | 0 | 7.156679   | 1.146844  | -1.901329 |

|     |   |   |           |           |           |
|-----|---|---|-----------|-----------|-----------|
| 190 | 1 | 0 | 9.324098  | -0.101303 | -2.924927 |
| 191 | 1 | 0 | 9.132750  | 1.124952  | -4.192426 |
| 192 | 1 | 0 | 10.040945 | 1.855643  | 3.903986  |
| 193 | 1 | 0 | 10.057880 | 0.482617  | 2.771651  |
| 194 | 1 | 0 | 12.715880 | -0.361210 | 2.393221  |

---

Cartesian coordinates of (Tet)<sub>2</sub>-CyO<sub>12</sub> at 130 degrees calculated with Gaussian 09 using DFT method at the B3LYP/6-31G level.

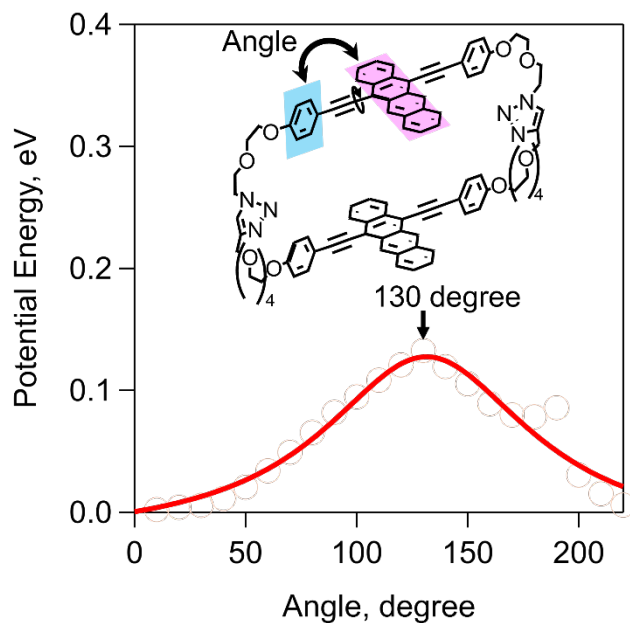

Optimized structure of (Tet)<sub>2</sub>-CyO<sub>12</sub> at 130 degree

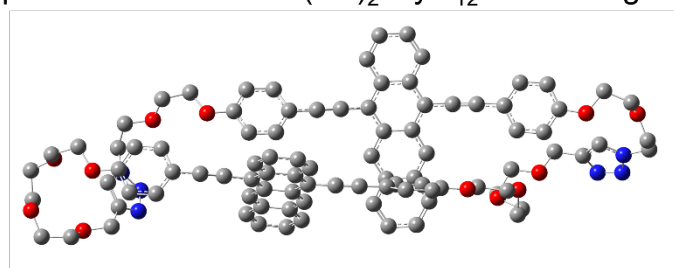

Standard orientation:

| Center Number | Atomic Number | Atomic Type | Coordinates (Angstroms) |           |           |
|---------------|---------------|-------------|-------------------------|-----------|-----------|
|               |               |             | X                       | Y         | Z         |
| 1             | 6             | 0           | 16.427773               | 1.244670  | -0.819283 |
| 2             | 6             | 0           | 16.181382               | 0.168647  | 0.225165  |
| 3             | 8             | 0           | 15.721782               | 0.838026  | 1.434632  |
| 4             | 6             | 0           | 15.259963               | -0.025954 | 2.512221  |
| 5             | 6             | 0           | 13.894343               | 0.448468  | 2.965317  |
| 6             | 8             | 0           | 12.981286               | 0.146419  | 1.872626  |
| 7             | 8             | 0           | 6.468912                | -4.048009 | -0.191815 |
| 8             | 6             | 0           | -3.756972               | -2.920754 | -0.675373 |

|    |   |   |            |           |           |
|----|---|---|------------|-----------|-----------|
| 9  | 6 | 0 | -2.333680  | -3.191556 | -0.690749 |
| 10 | 6 | 0 | -1.539790  | -2.591340 | -1.689562 |
| 11 | 6 | 0 | -2.079164  | -1.747244 | -2.663420 |
| 12 | 6 | 0 | -3.501889  | -1.468654 | -2.643542 |
| 13 | 6 | 0 | -4.294038  | -2.060145 | -1.655609 |
| 14 | 6 | 0 | -1.275001  | -1.151680 | -3.692743 |
| 15 | 6 | 0 | -1.836751  | -0.327553 | -4.636035 |
| 16 | 6 | 0 | -3.240961  | -0.046272 | -4.612220 |
| 17 | 6 | 0 | -4.046160  | -0.600088 | -3.648909 |
| 18 | 6 | 0 | -4.586228  | -3.534818 | 0.323300  |
| 19 | 6 | 0 | -4.021369  | -4.436653 | 1.259934  |
| 20 | 6 | 0 | -2.599309  | -4.702078 | 1.248185  |
| 21 | 6 | 0 | -1.763075  | -4.065206 | 0.297024  |
| 22 | 6 | 0 | -4.827918  | -5.089260 | 2.248761  |
| 23 | 6 | 0 | -4.276092  | -5.950940 | 3.163791  |
| 24 | 6 | 0 | -2.872603  | -6.211133 | 3.153225  |
| 25 | 6 | 0 | -2.063803  | -5.602027 | 2.226520  |
| 26 | 6 | 0 | -0.356111  | -4.248138 | 0.316575  |
| 27 | 6 | 0 | -5.966960  | -3.207576 | 0.362979  |
| 28 | 6 | 0 | 0.865771   | -4.308109 | 0.284384  |
| 29 | 6 | 0 | -7.137173  | -2.851191 | 0.342729  |
| 30 | 6 | 0 | 2.285406   | -4.243938 | 0.191016  |
| 31 | 6 | 0 | -8.468026  | -2.351115 | 0.256930  |
| 32 | 6 | 0 | 2.893633   | -3.047382 | -0.247356 |
| 33 | 6 | 0 | 4.277452   | -2.944146 | -0.375178 |
| 34 | 6 | 0 | 5.083619   | -4.049406 | -0.070433 |
| 35 | 6 | 0 | 4.501461   | -5.246124 | 0.378649  |
| 36 | 6 | 0 | 3.120240   | -5.341628 | 0.509849  |
| 37 | 6 | 0 | -9.590235  | -3.160107 | 0.527827  |
| 38 | 6 | 0 | -10.889719 | -2.662812 | 0.393744  |
| 39 | 6 | 0 | -11.084251 | -1.338436 | -0.024144 |
| 40 | 6 | 0 | -9.979192  | -0.508586 | -0.276594 |
| 41 | 6 | 0 | -8.690515  | -1.006036 | -0.135261 |
| 42 | 8 | 0 | -12.330490 | -0.750437 | -0.220073 |
| 43 | 6 | 0 | 2.770390   | 1.520188  | 0.413535  |
| 44 | 6 | 0 | 4.213729   | 1.414084  | 0.506188  |

|    |   |   |           |          |           |
|----|---|---|-----------|----------|-----------|
| 45 | 6 | 0 | 4.940403  | 1.021866 | -0.637387 |
| 46 | 6 | 0 | 4.317473  | 0.743848 | -1.857964 |
| 47 | 6 | 0 | 2.875167  | 0.867164 | -1.954730 |
| 48 | 6 | 0 | 2.147863  | 1.242411 | -0.820985 |
| 49 | 6 | 0 | 5.059644  | 0.342833 | -3.021812 |
| 50 | 6 | 0 | 4.413637  | 0.093139 | -4.207665 |
| 51 | 6 | 0 | 2.991537  | 0.229446 | -4.309064 |
| 52 | 6 | 0 | 2.246760  | 0.603711 | -3.218253 |
| 53 | 6 | 0 | 2.007167  | 1.902265 | 1.568242  |
| 54 | 6 | 0 | 2.673250  | 2.229448 | 2.780854  |
| 55 | 6 | 0 | 4.112602  | 2.130975 | 2.870666  |
| 56 | 6 | 0 | 4.870963  | 1.704346 | 1.749305  |
| 57 | 6 | 0 | 1.947157  | 2.649344 | 3.942435  |
| 58 | 6 | 0 | 2.589630  | 2.958631 | 5.115548  |
| 59 | 6 | 0 | 4.009802  | 2.860880 | 5.203568  |
| 60 | 6 | 0 | 4.742862  | 2.457595 | 4.115311  |
| 61 | 6 | 0 | 6.275041  | 1.537649 | 1.850758  |
| 62 | 6 | 0 | 0.590516  | 1.919770 | 1.512171  |
| 63 | 6 | 0 | 7.482559  | 1.348382 | 1.917569  |
| 64 | 6 | 0 | -0.633649 | 1.886588 | 1.518649  |
| 65 | 6 | 0 | 8.878591  | 1.073654 | 1.943401  |
| 66 | 6 | 0 | -2.052288 | 1.814927 | 1.603322  |
| 67 | 6 | 0 | 9.482425  | 0.380821 | 0.863398  |
| 68 | 6 | 0 | 10.838500 | 0.084066 | 0.881353  |
| 69 | 6 | 0 | 11.628258 | 0.478798 | 1.970934  |
| 70 | 6 | 0 | 11.057873 | 1.164447 | 3.051358  |
| 71 | 6 | 0 | 9.690451  | 1.454869 | 3.033038  |
| 72 | 6 | 0 | -2.717659 | 2.263398 | 2.764694  |
| 73 | 6 | 0 | -4.100832 | 2.144984 | 2.898340  |
| 74 | 6 | 0 | -4.852461 | 1.569122 | 1.862490  |
| 75 | 6 | 0 | -4.212592 | 1.140058 | 0.688130  |
| 76 | 6 | 0 | -2.834390 | 1.259417 | 0.559885  |
| 77 | 8 | 0 | -6.228223 | 1.370781 | 1.920343  |
| 78 | 6 | 0 | -6.896545 | 1.601090 | 3.196852  |
| 79 | 6 | 0 | -8.336299 | 1.144670 | 3.100435  |
| 80 | 8 | 0 | -9.136964 | 2.213938 | 2.525956  |

|     |   |   |            |           |           |
|-----|---|---|------------|-----------|-----------|
| 81  | 6 | 0 | -10.561579 | 2.039710  | 2.722676  |
| 82  | 6 | 0 | -11.270393 | 3.295912  | 2.226827  |
| 83  | 7 | 0 | -11.395754 | 3.377142  | 0.775604  |
| 84  | 6 | 0 | -12.147479 | 2.611086  | -0.066678 |
| 85  | 6 | 0 | -11.911999 | 3.136848  | -1.327707 |
| 86  | 7 | 0 | -11.035763 | 4.200603  | -1.208977 |
| 87  | 7 | 0 | -10.706842 | 4.358786  | 0.065823  |
| 88  | 6 | 0 | -12.489438 | 2.730059  | -2.632630 |
| 89  | 6 | 0 | -14.725688 | -0.699515 | -0.390130 |
| 90  | 6 | 0 | -13.536935 | -1.529844 | 0.033555  |
| 91  | 8 | 0 | -13.943139 | 2.906358  | -2.562582 |
| 92  | 6 | 0 | -14.702336 | 2.201219  | -3.576610 |
| 93  | 6 | 0 | -16.157539 | 2.186801  | -3.137590 |
| 94  | 8 | 0 | -16.360518 | 1.388712  | -1.936050 |
| 95  | 6 | 0 | -16.204284 | 2.122131  | -0.678068 |
| 96  | 6 | 0 | -16.147255 | 1.118905  | 0.457576  |
| 97  | 8 | 0 | -14.880766 | 0.400494  | 0.551941  |
| 98  | 8 | 0 | 9.318878   | -2.015327 | -1.344107 |
| 99  | 6 | 0 | 9.316307   | -1.907521 | -2.799442 |
| 100 | 6 | 0 | 9.713419   | -0.501668 | -3.182422 |
| 101 | 8 | 0 | 8.581829   | 0.382828  | -2.904337 |
| 102 | 6 | 0 | 8.756636   | 1.756782  | -3.355821 |
| 103 | 6 | 0 | 9.553635   | 2.620241  | -2.396065 |
| 104 | 8 | 0 | 10.948505  | 2.207351  | -2.431579 |
| 105 | 6 | 0 | 7.124097   | -2.838290 | -0.675359 |
| 106 | 6 | 0 | 8.606270   | -3.168638 | -0.811425 |
| 107 | 6 | 0 | 11.825506  | 3.139406  | -1.717146 |
| 108 | 7 | 0 | 15.238331  | 2.379860  | -2.648419 |
| 109 | 7 | 0 | 14.038187  | 2.894229  | -2.870555 |
| 110 | 6 | 0 | 13.229943  | 2.666935  | -1.769513 |
| 111 | 6 | 0 | 13.965436  | 1.979001  | -0.816378 |
| 112 | 7 | 0 | 15.198117  | 1.810625  | -1.374609 |
| 113 | 1 | 0 | 16.986777  | 0.834148  | -1.664036 |
| 114 | 1 | 0 | 17.024856  | 2.044366  | -0.367777 |
| 115 | 1 | 0 | 15.431408  | -0.554833 | -0.120172 |
| 116 | 1 | 0 | 17.122965  | -0.364294 | 0.419430  |

|     |   |   |            |           |           |
|-----|---|---|------------|-----------|-----------|
| 117 | 1 | 0 | 15.973643  | 0.030397  | 3.343695  |
| 118 | 1 | 0 | 15.189869  | -1.067272 | 2.175605  |
| 119 | 1 | 0 | 13.583452  | -0.079677 | 3.876710  |
| 120 | 1 | 0 | 13.913426  | 1.527049  | 3.161405  |
| 121 | 1 | 0 | -0.476893  | -2.804379 | -1.706485 |
| 122 | 1 | 0 | -5.360870  | -1.865919 | -1.648667 |
| 123 | 1 | 0 | -0.211431  | -1.371592 | -3.709437 |
| 124 | 1 | 0 | -1.221263  | 0.115594  | -5.412592 |
| 125 | 1 | 0 | -3.663361  | 0.609257  | -5.366959 |
| 126 | 1 | 0 | -5.112214  | -0.392125 | -3.631540 |
| 127 | 1 | 0 | -5.892413  | -4.883442 | 2.255207  |
| 128 | 1 | 0 | -4.905204  | -6.436944 | 3.902793  |
| 129 | 1 | 0 | -2.447885  | -6.891348 | 3.884448  |
| 130 | 1 | 0 | -0.996096  | -5.789883 | 2.215414  |
| 131 | 1 | 0 | 2.272516   | -2.190041 | -0.481527 |
| 132 | 1 | 0 | 4.704683   | -2.006497 | -0.704953 |
| 133 | 1 | 0 | 5.148865   | -6.083170 | 0.612246  |
| 134 | 1 | 0 | 2.672166   | -6.268476 | 0.851184  |
| 135 | 1 | 0 | -9.439698  | -4.189345 | 0.835311  |
| 136 | 1 | 0 | -11.729521 | -3.311818 | 0.609069  |
| 137 | 1 | 0 | -10.152012 | 0.516944  | -0.580061 |
| 138 | 1 | 0 | -7.840224  | -0.356152 | -0.308699 |
| 139 | 1 | 0 | 6.020391   | 0.945349  | -0.570472 |
| 140 | 1 | 0 | 1.068918   | 1.333357  | -0.889481 |
| 141 | 1 | 0 | 6.139745   | 0.238982  | -2.943054 |
| 142 | 1 | 0 | 4.980096   | -0.208699 | -5.083194 |
| 143 | 1 | 0 | 2.507081   | 0.034847  | -5.260877 |
| 144 | 1 | 0 | 1.168236   | 0.709921  | -3.291401 |
| 145 | 1 | 0 | 0.868371   | 2.720243  | 3.871089  |
| 146 | 1 | 0 | 2.018883   | 3.278155  | 5.981577  |
| 147 | 1 | 0 | 4.508032   | 3.106341  | 6.136036  |
| 148 | 1 | 0 | 5.822176   | 2.379047  | 4.175874  |
| 149 | 1 | 0 | 8.890997   | 0.065194  | 0.012460  |
| 150 | 1 | 0 | 11.289788  | -0.464726 | 0.064862  |
| 151 | 1 | 0 | 11.655977  | 1.472484  | 3.900655  |
| 152 | 1 | 0 | 9.244188   | 1.982321  | 3.869226  |



|     |   |   |            |           |           |
|-----|---|---|------------|-----------|-----------|
| 153 | 1 | 0 | -2.138495  | 2.700644  | 3.570880  |
| 154 | 1 | 0 | -4.574882  | 2.500107  | 3.804341  |
| 155 | 1 | 0 | -4.808434  | 0.695516  | -0.099303 |
| 156 | 1 | 0 | -2.346048  | 0.903377  | -0.340222 |
| 157 | 1 | 0 | -6.377309  | 1.027757  | 3.976442  |
| 158 | 1 | 0 | -6.870626  | 2.666149  | 3.454134  |
| 159 | 1 | 0 | -8.701227  | 0.922899  | 4.116923  |
| 160 | 1 | 0 | -8.408155  | 0.231789  | 2.497044  |
| 161 | 1 | 0 | -10.778396 | 1.912983  | 3.796543  |
| 162 | 1 | 0 | -10.926461 | 1.146956  | 2.195774  |
| 163 | 1 | 0 | -10.703950 | 4.176843  | 2.534786  |
| 164 | 1 | 0 | -12.272810 | 3.345942  | 2.666374  |
| 165 | 1 | 0 | -12.773768 | 1.792935  | 0.255424  |
| 166 | 1 | 0 | -12.063730 | 3.350616  | -3.429915 |
| 167 | 1 | 0 | -12.275636 | 1.673552  | -2.852689 |
| 168 | 1 | 0 | -15.627655 | -1.330221 | -0.373324 |
| 169 | 1 | 0 | -14.595298 | -0.322072 | -1.407073 |
| 170 | 1 | 0 | -13.509409 | -2.456397 | -0.555470 |
| 171 | 1 | 0 | -13.601649 | -1.780614 | 1.099126  |
| 172 | 1 | 0 | -14.335205 | 1.168724  | -3.676590 |
| 173 | 1 | 0 | -14.607957 | 2.697801  | -4.555739 |
| 174 | 1 | 0 | -16.770255 | 1.718685  | -3.914727 |
| 175 | 1 | 0 | -16.513193 | 3.213871  | -2.980415 |
| 176 | 1 | 0 | -15.294249 | 2.725083  | -0.708208 |
| 177 | 1 | 0 | -17.073104 | 2.784630  | -0.533583 |
| 178 | 1 | 0 | -16.976829 | 0.402532  | 0.367439  |
| 179 | 1 | 0 | -16.238990 | 1.646944  | 1.411647  |
| 180 | 1 | 0 | 8.322288   | -2.130425 | -3.207569 |
| 181 | 1 | 0 | 10.035914  | -2.626508 | -3.218307 |
| 182 | 1 | 0 | 10.595948  | -0.169964 | -2.629941 |
| 183 | 1 | 0 | 9.944581   | -0.467911 | -4.258270 |
| 184 | 1 | 0 | 7.741466   | 2.156032  | -3.442269 |
| 185 | 1 | 0 | 9.231146   | 1.770786  | -4.347038 |
| 186 | 1 | 0 | 9.464966   | 3.674050  | -2.708410 |
| 187 | 1 | 0 | 9.154387   | 2.526027  | -1.376412 |
| 188 | 1 | 0 | 6.699786   | -2.543936 | -1.643141 |

|     |   |   |           |           |           |
|-----|---|---|-----------|-----------|-----------|
| 189 | 1 | 0 | 6.978827  | -2.015731 | 0.033879  |
| 190 | 1 | 0 | 9.045794  | -3.374302 | 0.166209  |
| 191 | 1 | 0 | 8.742500  | -4.050660 | -1.450855 |
| 192 | 1 | 0 | 11.749657 | 4.126549  | -2.193421 |
| 193 | 1 | 0 | 11.491004 | 3.228459  | -0.674478 |
| 194 | 1 | 0 | 13.716869 | 1.606494  | 0.162175  |

---

Cartesian coordinates of (Tet)<sub>2</sub>-CyO<sub>12</sub> at 220 degrees calculated with Gaussian 09 using DFT method at the B3LYP/6-31G level.

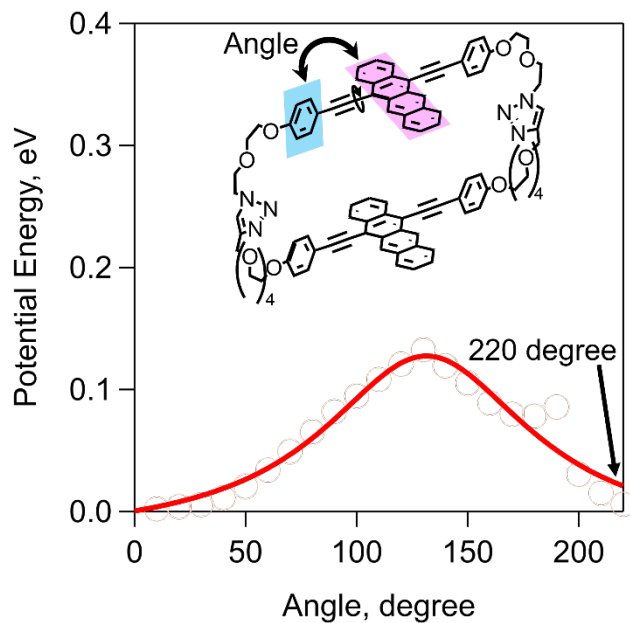

Optimized structure of (Tet)<sub>2</sub>-CyO<sub>12</sub> at 220 degree

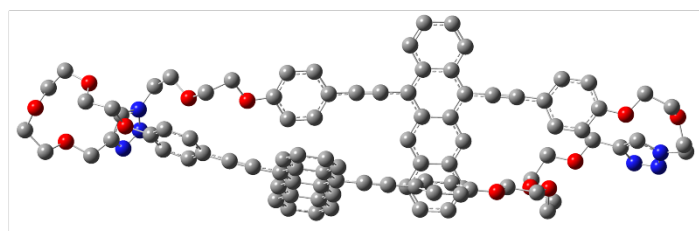

Standard orientation:

| Center Number | Atomic Number | Atomic Type | Coordinates (Angstroms) |           |           |
|---------------|---------------|-------------|-------------------------|-----------|-----------|
|               |               |             | X                       | Y         | Z         |
| 1             | 6             | 0           | 15.294804               | 0.908397  | 2.267424  |
| 2             | 6             | 0           | 15.402902               | -0.163830 | 1.200061  |
| 3             | 8             | 0           | 14.996594               | -1.399458 | 1.763293  |
| 4             | 6             | 0           | 14.827768               | -2.453320 | 0.832158  |
| 5             | 6             | 0           | 13.362091               | -2.811999 | 0.704132  |
| 6             | 8             | 0           | 12.698801               | -1.698088 | 0.134139  |
| 7             | 8             | 0           | 6.975147                | -0.525813 | -3.103832 |
| 8             | 6             | 0           | -3.106344               | -0.616906 | -1.983740 |

|    |   |   |            |           |           |
|----|---|---|------------|-----------|-----------|
| 9  | 6 | 0 | -1.676596  | -0.675419 | -2.086827 |
| 10 | 6 | 0 | -0.955377  | 0.520921  | -2.240754 |
| 11 | 6 | 0 | -1.586375  | 1.753908  | -2.282469 |
| 12 | 6 | 0 | -3.020221  | 1.813808  | -2.189823 |
| 13 | 6 | 0 | -3.741251  | 0.636137  | -2.058372 |
| 14 | 6 | 0 | -0.847185  | 2.978430  | -2.404018 |
| 15 | 6 | 0 | -1.487977  | 4.179119  | -2.416696 |
| 16 | 6 | 0 | -2.917092  | 4.241553  | -2.315807 |
| 17 | 6 | 0 | -3.655151  | 3.101865  | -2.211809 |
| 18 | 6 | 0 | -3.840167  | -1.817671 | -1.762199 |
| 19 | 6 | 0 | -3.170542  | -3.036338 | -1.590513 |
| 20 | 6 | 0 | -1.739936  | -3.094206 | -1.697264 |
| 21 | 6 | 0 | -1.012316  | -1.932436 | -1.984873 |
| 22 | 6 | 0 | -3.878342  | -4.241312 | -1.271235 |
| 23 | 6 | 0 | -3.215297  | -5.411631 | -1.057605 |
| 24 | 6 | 0 | -1.790186  | -5.467383 | -1.162009 |
| 25 | 6 | 0 | -1.081083  | -4.348853 | -1.479454 |
| 26 | 6 | 0 | 0.398699   | -1.960772 | -2.168334 |
| 27 | 6 | 0 | -5.259789  | -1.740723 | -1.654834 |
| 28 | 6 | 0 | 1.590653   | -1.845924 | -2.366810 |
| 29 | 6 | 0 | -6.459661  | -1.589652 | -1.552197 |
| 30 | 6 | 0 | 2.966675   | -1.533392 | -2.588203 |
| 31 | 6 | 0 | -7.848005  | -1.307378 | -1.355479 |
| 32 | 6 | 0 | 3.323695   | -0.195170 | -2.784655 |
| 33 | 6 | 0 | 4.649123   | 0.179667  | -2.959606 |
| 34 | 6 | 0 | 5.649945   | -0.794001 | -2.949460 |
| 35 | 6 | 0 | 5.304710   | -2.140196 | -2.768857 |
| 36 | 6 | 0 | 3.981702   | -2.504549 | -2.586775 |
| 37 | 6 | 0 | -8.850373  | -2.194326 | -1.754756 |
| 38 | 6 | 0 | -10.196456 | -1.909760 | -1.524651 |
| 39 | 6 | 0 | -10.552380 | -0.715453 | -0.891694 |
| 40 | 6 | 0 | -9.554839  | 0.182524  | -0.488356 |
| 41 | 6 | 0 | -8.224796  | -0.111056 | -0.717673 |
| 42 | 8 | 0 | -11.830474 | -0.338692 | -0.620631 |
| 43 | 6 | 0 | 2.445383   | 0.422549  | 0.537786  |
| 44 | 6 | 0 | 3.873953   | 0.338096  | 0.415197  |

|    |   |   |           |           |           |
|----|---|---|-----------|-----------|-----------|
| 45 | 6 | 0 | 4.592084  | 1.486610  | 0.035131  |
| 46 | 6 | 0 | 3.951385  | 2.681857  | -0.258126 |
| 47 | 6 | 0 | 2.523859  | 2.776129  | -0.098700 |
| 48 | 6 | 0 | 1.809087  | 1.655020  | 0.298181  |
| 49 | 6 | 0 | 4.669151  | 3.827757  | -0.746098 |
| 50 | 6 | 0 | 4.015581  | 4.990684  | -1.019092 |
| 51 | 6 | 0 | 2.600186  | 5.099223  | -0.815963 |
| 52 | 6 | 0 | 1.881387  | 4.031723  | -0.372159 |
| 53 | 6 | 0 | 1.698449  | -0.744340 | 0.858294  |
| 54 | 6 | 0 | 2.339334  | -1.989117 | 0.965587  |
| 55 | 6 | 0 | 3.764761  | -2.074651 | 0.840213  |
| 56 | 6 | 0 | 4.520273  | -0.914393 | 0.605505  |
| 57 | 6 | 0 | 1.592672  | -3.196880 | 1.160833  |
| 58 | 6 | 0 | 2.213551  | -4.406764 | 1.222635  |
| 59 | 6 | 0 | 3.634764  | -4.491803 | 1.107597  |
| 60 | 6 | 0 | 4.380356  | -3.365973 | 0.929096  |
| 61 | 6 | 0 | 5.938392  | -1.007753 | 0.512879  |
| 62 | 6 | 0 | 0.289361  | -0.668618 | 1.037248  |
| 63 | 6 | 0 | 7.143941  | -1.135953 | 0.448451  |
| 64 | 6 | 0 | -0.913134 | -0.673591 | 1.201549  |
| 65 | 6 | 0 | 8.560548  | -1.310729 | 0.371023  |
| 66 | 6 | 0 | -2.325160 | -0.794302 | 1.373229  |
| 67 | 6 | 0 | 9.388691  | -0.242226 | -0.005445 |
| 68 | 6 | 0 | 10.759401 | -0.404380 | -0.087324 |
| 69 | 6 | 0 | 11.337602 | -1.639073 | 0.218621  |
| 70 | 6 | 0 | 10.529044 | -2.716630 | 0.591535  |
| 71 | 6 | 0 | 9.149140  | -2.546122 | 0.663953  |
| 72 | 6 | 0 | -2.879500 | -2.053910 | 1.622837  |
| 73 | 6 | 0 | -4.251581 | -2.223216 | 1.762154  |
| 74 | 6 | 0 | -5.100011 | -1.118737 | 1.642192  |
| 75 | 6 | 0 | -4.554945 | 0.150773  | 1.406280  |
| 76 | 6 | 0 | -3.187720 | 0.310649  | 1.273010  |
| 77 | 8 | 0 | -6.452818 | -1.180825 | 1.718509  |
| 78 | 6 | 0 | -7.033160 | -2.423590 | 2.062679  |
| 79 | 6 | 0 | -8.539027 | -2.311123 | 2.037416  |
| 80 | 8 | 0 | -8.973670 | -1.328238 | 2.948770  |

|     |   |   |            |           |           |
|-----|---|---|------------|-----------|-----------|
| 81  | 6 | 0 | -10.368128 | -1.343417 | 3.126409  |
| 82  | 6 | 0 | -10.792819 | -0.061337 | 3.826076  |
| 83  | 7 | 0 | -10.933807 | 1.061032  | 2.915784  |
| 84  | 6 | 0 | -11.916245 | 1.264984  | 2.012228  |
| 85  | 6 | 0 | -11.583117 | 2.460636  | 1.422662  |
| 86  | 7 | 0 | -10.432865 | 2.914293  | 1.987749  |
| 87  | 7 | 0 | -10.039288 | 2.061142  | 2.892094  |
| 88  | 6 | 0 | -12.290254 | 3.168030  | 0.316586  |
| 89  | 6 | 0 | -14.196641 | -0.518988 | -0.672050 |
| 90  | 6 | 0 | -12.891043 | -1.180420 | -1.041726 |
| 91  | 8 | 0 | -13.681066 | 3.088094  | 0.567948  |
| 92  | 6 | 0 | -14.493344 | 3.483538  | -0.512065 |
| 93  | 6 | 0 | -15.933851 | 3.134947  | -0.180467 |
| 94  | 8 | 0 | -16.135577 | 1.737744  | -0.071360 |
| 95  | 6 | 0 | -15.961332 | 1.213198  | 1.237958  |
| 96  | 6 | 0 | -15.707008 | -0.279759 | 1.158145  |
| 97  | 8 | 0 | -14.402961 | -0.633344 | 0.725321  |
| 98  | 8 | 0 | 9.559324   | 1.774161  | -2.268505 |
| 99  | 6 | 0 | 9.132851   | 3.124164  | -2.279903 |
| 100 | 6 | 0 | 9.017454   | 3.620200  | -0.854533 |
| 101 | 8 | 0 | 7.880658   | 3.013534  | -0.252125 |
| 102 | 6 | 0 | 7.692867   | 3.349963  | 1.115721  |
| 103 | 6 | 0 | 8.289700   | 2.337315  | 2.070271  |
| 104 | 8 | 0 | 9.693196   | 2.343380  | 1.932072  |
| 105 | 6 | 0 | 7.389548   | 0.820465  | -2.921981 |
| 106 | 6 | 0 | 8.904882   | 0.881571  | -3.146102 |
| 107 | 6 | 0 | 10.342096  | 1.537689  | 2.895133  |
| 108 | 7 | 0 | 13.726067  | 2.704953  | 2.638990  |
| 109 | 7 | 0 | 12.451441  | 2.883208  | 2.812696  |
| 110 | 6 | 0 | 11.820032  | 1.678716  | 2.739807  |
| 111 | 6 | 0 | 12.770009  | 0.707890  | 2.522244  |
| 112 | 7 | 0 | 13.936767  | 1.388420  | 2.464640  |
| 113 | 1 | 0 | 15.878244  | 1.783644  | 1.981751  |
| 114 | 1 | 0 | 15.690643  | 0.520780  | 3.209454  |
| 115 | 1 | 0 | 14.780122  | 0.097754  | 0.336431  |
| 116 | 1 | 0 | 16.448987  | -0.229052 | 0.871578  |

|     |   |   |            |           |           |
|-----|---|---|------------|-----------|-----------|
| 117 | 1 | 0 | 15.375235  | -3.326932 | 1.200156  |
| 118 | 1 | 0 | 15.235413  | -2.185233 | -0.148705 |
| 119 | 1 | 0 | 13.244326  | -3.703474 | 0.074149  |
| 120 | 1 | 0 | 12.957832  | -3.027778 | 1.700471  |
| 121 | 1 | 0 | 0.127064   | 0.476626  | -2.296774 |
| 122 | 1 | 0 | -4.822300  | 0.681907  | -1.973556 |
| 123 | 1 | 0 | 0.235525   | 2.927448  | -2.484227 |
| 124 | 1 | 0 | -0.919710  | 5.099862  | -2.507451 |
| 125 | 1 | 0 | -3.408242  | 5.209436  | -2.326181 |
| 126 | 1 | 0 | -4.737944  | 3.150674  | -2.137104 |
| 127 | 1 | 0 | -4.959684  | -4.197782 | -1.190026 |
| 128 | 1 | 0 | -3.767882  | -6.312255 | -0.808092 |
| 129 | 1 | 0 | -1.276937  | -6.408290 | -0.990427 |
| 130 | 1 | 0 | 0.001019   | -4.384199 | -1.559604 |
| 131 | 1 | 0 | 2.555810   | 0.571618  | -2.767832 |
| 132 | 1 | 0 | 4.877368   | 1.231761  | -3.071916 |
| 133 | 1 | 0 | 6.097076   | -2.880322 | -2.746264 |
| 134 | 1 | 0 | 3.726507   | -3.545137 | -2.415989 |
| 135 | 1 | 0 | -8.577556  | -3.121184 | -2.248757 |
| 136 | 1 | 0 | -10.946026 | -2.623433 | -1.845171 |
| 137 | 1 | 0 | -9.837460  | 1.099365  | 0.016668  |
| 138 | 1 | 0 | -7.458120  | 0.573336  | -0.373248 |
| 139 | 1 | 0 | 5.669588   | 1.418630  | -0.086808 |
| 140 | 1 | 0 | 0.729660   | 1.719297  | 0.406201  |
| 141 | 1 | 0 | 5.741970   | 3.737010  | -0.899601 |
| 142 | 1 | 0 | 4.564866   | 5.850040  | -1.391338 |
| 143 | 1 | 0 | 2.104580   | 6.043378  | -1.019746 |
| 144 | 1 | 0 | 0.808416   | 4.110770  | -0.221514 |
| 145 | 1 | 0 | 0.513110   | -3.129325 | 1.236833  |
| 146 | 1 | 0 | 1.629526   | -5.311949 | 1.356561  |
| 147 | 1 | 0 | 4.119831   | -5.461607 | 1.160262  |
| 148 | 1 | 0 | 5.458100   | -3.432294 | 0.829569  |
| 149 | 1 | 0 | 8.959034   | 0.725067  | -0.235934 |
| 150 | 1 | 0 | 11.390881  | 0.428383  | -0.376427 |
| 151 | 1 | 0 | 10.953704  | -3.688465 | 0.814624  |
| 152 | 1 | 0 | 8.521457   | -3.383064 | 0.952488  |

|     |   |   |            |           |           |
|-----|---|---|------------|-----------|-----------|
| 153 | 1 | 0 | -2.227635  | -2.919403 | 1.686460  |
| 154 | 1 | 0 | -4.636895  | -3.219569 | 1.938035  |
| 155 | 1 | 0 | -5.227817  | 0.997933  | 1.326456  |
| 156 | 1 | 0 | -2.775507  | 1.293991  | 1.071637  |
| 157 | 1 | 0 | -6.746556  | -3.195560 | 1.336552  |
| 158 | 1 | 0 | -6.693346  | -2.727837 | 3.060645  |
| 159 | 1 | 0 | -8.942359  | -3.300083 | 2.308869  |
| 160 | 1 | 0 | -8.888527  | -2.071402 | 1.026929  |
| 161 | 1 | 0 | -10.663424 | -2.205682 | 3.744145  |
| 162 | 1 | 0 | -10.889337 | -1.429658 | 2.161352  |
| 163 | 1 | 0 | -10.047845 | 0.218370  | 4.570749  |
| 164 | 1 | 0 | -11.751903 | -0.212212 | 4.326195  |
| 165 | 1 | 0 | -12.725280 | 0.569811  | 1.832303  |
| 166 | 1 | 0 | -11.951958 | 4.210842  | 0.266266  |
| 167 | 1 | 0 | -12.062580 | 2.685510  | -0.645847 |
| 168 | 1 | 0 | -15.010908 | -1.023016 | -1.211533 |
| 169 | 1 | 0 | -14.183710 | 0.529604  | -0.983628 |
| 170 | 1 | 0 | -12.853284 | -1.314733 | -2.130127 |
| 171 | 1 | 0 | -12.819051 | -2.162132 | -0.558149 |
| 172 | 1 | 0 | -14.193587 | 2.958822  | -1.431784 |
| 173 | 1 | 0 | -14.407860 | 4.566022  | -0.695547 |
| 174 | 1 | 0 | -16.577846 | 3.486083  | -0.991287 |
| 175 | 1 | 0 | -16.238772 | 3.646542  | 0.741022  |
| 176 | 1 | 0 | -15.121321 | 1.696728  | 1.743697  |
| 177 | 1 | 0 | -16.875735 | 1.383205  | 1.826888  |
| 178 | 1 | 0 | -16.461606 | -0.750400 | 0.512599  |
| 179 | 1 | 0 | -15.807935 | -0.702617 | 2.160921  |
| 180 | 1 | 0 | 8.165268   | 3.244020  | -2.780310 |
| 181 | 1 | 0 | 9.867159   | 3.737578  | -2.818051 |
| 182 | 1 | 0 | 9.926311   | 3.372010  | -0.296779 |
| 183 | 1 | 0 | 8.895898   | 4.713180  | -0.861867 |
| 184 | 1 | 0 | 6.612888   | 3.392251  | 1.288237  |
| 185 | 1 | 0 | 8.109639   | 4.342984  | 1.323051  |
| 186 | 1 | 0 | 7.999803   | 2.617789  | 3.095415  |
| 187 | 1 | 0 | 7.878460   | 1.337347  | 1.866376  |
| 188 | 1 | 0 | 6.866728   | 1.474623  | -3.628502 |



|     |   |   |           |           |           |
|-----|---|---|-----------|-----------|-----------|
| 189 | 1 | 0 | 7.156679  | 1.146844  | -1.901329 |
| 190 | 1 | 0 | 9.324098  | -0.101303 | -2.924927 |
| 191 | 1 | 0 | 9.132750  | 1.124952  | -4.192426 |
| 192 | 1 | 0 | 10.040945 | 1.855643  | 3.903986  |
| 193 | 1 | 0 | 10.057880 | 0.482617  | 2.771651  |
| 194 | 1 | 0 | 12.715880 | -0.361210 | 2.393221  |

---

DFT-computed energy landscape scanning over rotation of one pentacene–phenylene dihedral angles of (Tet)<sub>2</sub>-CyO<sub>12</sub> calculated with Gaussian 09 using DFT method at the B3LYP/6-31G level.

| Angle, degree | Total Energy (Hartree) | Potential Energy, eV |
|---------------|------------------------|----------------------|
| 0             | -4860.89438434         | 0.00                 |
| 10            | -4860.89429823         | 0.00                 |
| 20            | -4860.89423228         | 0.00                 |
| 30            | -4860.89417085         | 0.00                 |
| 40            | -4860.89396193         | 0.01                 |
| 50            | -4860.89362397         | 0.02                 |
| 60            | -4860.89312974         | 0.03                 |
| 70            | -4860.89257167         | 0.05                 |
| 80            | -4860.89198444         | 0.06                 |
| 90            | -4860.89136603         | 0.08                 |
| 100           | -4860.89089777         | 0.09                 |
| 110           | -4860.89039718         | 0.11                 |
| 120           | -4860.88993609         | 0.12                 |
| 130           | -4860.88951289         | 0.13                 |
| 140           | -4860.88998612         | 0.12                 |
| 150           | -4860.89051365         | 0.11                 |
| 160           | -4860.89111384         | 0.08                 |
| 170           | -4860.89144699         | 0.08                 |
| 180           | -4860.89149825         | 0.08                 |
| 190           | -4860.89122734         | 0.09                 |
| 200           | -4860.89326241         | 0.03                 |
| 210           | -4860.89381778         | 0.02                 |
| 220           | -4860.89416092         | 0.01                 |

Cartesian coordinates of (Tet)<sub>2</sub>-CyO<sub>10</sub> at 0 degrees calculated with Gaussian 09 using DFT method at the B3LYP/6-31G level.

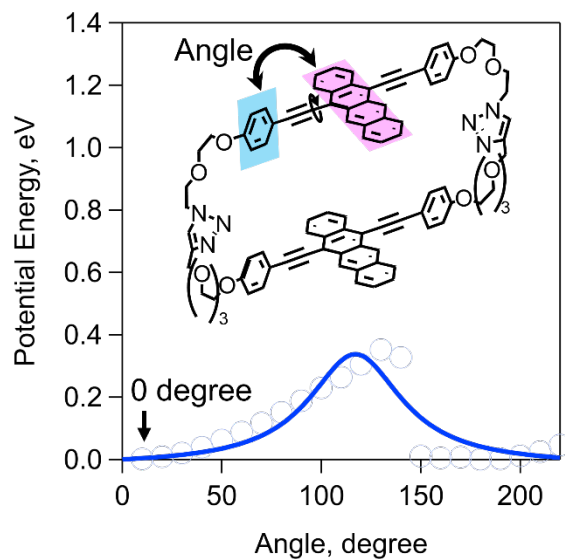

Optimized structure of (Tet)<sub>2</sub>-CyO<sub>10</sub> at 0 degree

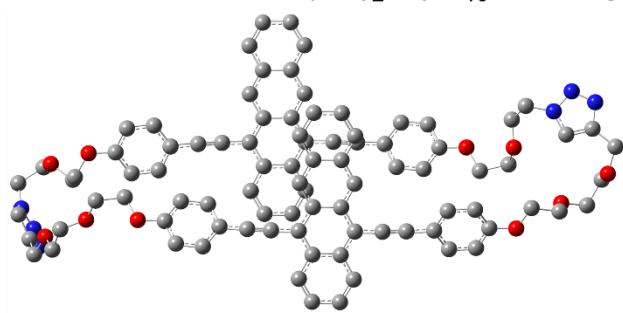

Standard orientation:

| Center Number | Atomic Number | Atomic Type | Coordinates (Angstroms) |           |           |
|---------------|---------------|-------------|-------------------------|-----------|-----------|
|               |               |             | X                       | Y         | Z         |
| 1             | 8             | 0           | 10.035569               | -2.993095 | 0.205103  |
| 2             | 8             | 0           | -8.911459               | -0.809235 | 2.902591  |
| 3             | 6             | 0           | -5.451622               | 0.237444  | 2.178864  |
| 4             | 6             | 0           | -6.808139               | 0.353439  | 2.466305  |
| 5             | 6             | 0           | -7.587355               | -0.798443 | 2.600145  |
| 6             | 6             | 0           | -6.999497               | -2.056932 | 2.419454  |
| 7             | 6             | 0           | -5.651483               | -2.161433 | 2.127593  |
| 8             | 6             | 0           | 6.455457                | -3.219361 | -0.311211 |

|    |   |   |            |           |           |
|----|---|---|------------|-----------|-----------|
| 9  | 6 | 0 | 7.817347   | -3.461185 | -0.392330 |
| 10 | 6 | 0 | 8.712567   | -2.704385 | 0.371106  |
| 11 | 6 | 0 | 8.230018   | -1.687735 | 1.199374  |
| 12 | 6 | 0 | 6.861139   | -1.448892 | 1.270826  |
| 13 | 6 | 0 | -4.848843  | -1.012867 | 2.010801  |
| 14 | 6 | 0 | 5.952883   | -2.213719 | 0.529785  |
| 15 | 6 | 0 | -3.449938  | -1.129560 | 1.740063  |
| 16 | 6 | 0 | 4.543492   | -1.993299 | 0.638497  |
| 17 | 6 | 0 | 3.345279   | -1.839976 | 0.757623  |
| 18 | 6 | 0 | -2.259055  | -1.250130 | 1.538065  |
| 19 | 6 | 0 | -1.170283  | -3.776317 | 0.741213  |
| 20 | 6 | 0 | -0.651465  | -4.979367 | 0.372092  |
| 21 | 6 | 0 | 0.755386   | -5.125913 | 0.175369  |
| 22 | 6 | 0 | 1.590848   | -4.066094 | 0.357679  |
| 23 | 6 | 0 | -0.857164  | -1.393037 | 1.326893  |
| 24 | 6 | 0 | -0.327911  | -2.634734 | 0.944367  |
| 25 | 6 | 0 | 1.085806   | -2.782340 | 0.747081  |
| 26 | 6 | 0 | 1.938753   | -1.684369 | 0.934642  |
| 27 | 6 | 0 | -0.506632  | 0.981695  | 1.909792  |
| 28 | 6 | 0 | -0.000865  | -0.272111 | 1.522091  |
| 29 | 6 | 0 | 1.413533   | -0.419933 | 1.322105  |
| 30 | 6 | 0 | 2.246778   | 0.697970  | 1.503855  |
| 31 | 6 | 0 | -0.184424  | 3.356503  | 2.500366  |
| 32 | 6 | 0 | 0.324380   | 2.074523  | 2.102632  |
| 33 | 6 | 0 | 1.738479   | 1.929626  | 1.886229  |
| 34 | 6 | 0 | 2.582689   | 3.077357  | 2.066957  |
| 35 | 6 | 0 | 2.058581   | 4.274615  | 2.446721  |
| 36 | 6 | 0 | 0.650548   | 4.416465  | 2.671374  |
| 37 | 8 | 0 | 8.916434   | 1.116754  | -1.403295 |
| 38 | 8 | 0 | -10.196979 | 1.185884  | -0.206384 |
| 39 | 6 | 0 | -6.748228  | 2.110008  | -0.771087 |
| 40 | 6 | 0 | -8.110720  | 2.177433  | -0.536678 |
| 41 | 6 | 0 | -8.880170  | 1.008132  | -0.494699 |
| 42 | 6 | 0 | -8.262129  | -0.229762 | -0.697638 |
| 43 | 6 | 0 | -6.893685  | -0.288150 | -0.935576 |
| 44 | 6 | 0 | 5.631301   | -0.286058 | -2.300182 |

|    |   |   |            |           |           |
|----|---|---|------------|-----------|-----------|
| 45 | 6 | 0 | 7.014961   | -0.178914 | -2.204485 |
| 46 | 6 | 0 | 7.580857   | 0.918345  | -1.552036 |
| 47 | 6 | 0 | 6.750920   | 1.905716  | -1.007019 |
| 48 | 6 | 0 | 5.376104   | 1.793686  | -1.111824 |
| 49 | 6 | 0 | -6.114740  | 0.872984  | -0.972614 |
| 50 | 6 | 0 | 4.791248   | 0.692727  | -1.762128 |
| 51 | 6 | 0 | -4.701055  | 0.802788  | -1.167500 |
| 52 | 6 | 0 | 3.369049   | 0.598784  | -1.850547 |
| 53 | 6 | 0 | 2.155989   | 0.581828  | -1.862047 |
| 54 | 6 | 0 | -3.496222  | 0.745328  | -1.302719 |
| 55 | 6 | 0 | -2.204278  | -1.685705 | -2.104716 |
| 56 | 6 | 0 | -1.583270  | -2.839318 | -2.474054 |
| 57 | 6 | 0 | -0.163695  | -2.883965 | -2.620320 |
| 58 | 6 | 0 | 0.585349   | -1.770947 | -2.391006 |
| 59 | 6 | 0 | -2.081738  | 0.700463  | -1.463881 |
| 60 | 6 | 0 | -1.453998  | -0.489973 | -1.859364 |
| 61 | 6 | 0 | -0.027581  | -0.532936 | -2.011233 |
| 62 | 6 | 0 | 0.735275   | 0.619208  | -1.774990 |
| 63 | 6 | 0 | -1.919784  | 3.079117  | -0.810746 |
| 64 | 6 | 0 | -1.317356  | 1.877552  | -1.225573 |
| 65 | 6 | 0 | 0.106671   | 1.840806  | -1.400961 |
| 66 | 6 | 0 | 0.848263   | 3.015990  | -1.185229 |
| 67 | 6 | 0 | -1.783191  | 5.455568  | -0.149921 |
| 68 | 6 | 0 | -1.178167  | 4.229938  | -0.589383 |
| 69 | 6 | 0 | 0.243686   | 4.201875  | -0.799422 |
| 70 | 6 | 0 | 0.997212   | 5.403777  | -0.584234 |
| 71 | 6 | 0 | 0.384605   | 6.547970  | -0.175305 |
| 72 | 6 | 0 | -1.030514  | 6.571840  | 0.052522  |
| 73 | 6 | 0 | 10.921983  | -2.719343 | 1.287444  |
| 74 | 6 | 0 | 12.280721  | -3.273488 | 0.922165  |
| 75 | 8 | 0 | 12.923800  | -2.368374 | 0.048497  |
| 76 | 8 | 0 | 10.833736  | 0.472144  | 0.512284  |
| 77 | 6 | 0 | 11.080129  | 0.290636  | -0.876516 |
| 78 | 6 | 0 | 9.788349   | 0.016223  | -1.616866 |
| 79 | 8 | 0 | -11.726322 | -0.583193 | 2.788469  |
| 80 | 6 | 0 | -10.935848 | 0.166386  | 3.681570  |

|     |   |   |            |           |           |
|-----|---|---|------------|-----------|-----------|
| 81  | 6 | 0 | -9.571719  | 0.431105  | 3.091342  |
| 82  | 6 | 0 | -11.110343 | 0.115091  | -0.428686 |
| 83  | 6 | 0 | -11.359990 | -0.140922 | -1.900768 |
| 84  | 8 | 0 | -11.988790 | 1.002693  | -2.461700 |
| 85  | 7 | 0 | 13.222504  | 1.918318  | 0.936575  |
| 86  | 6 | 0 | 12.034034  | 2.167801  | 1.730058  |
| 87  | 6 | 0 | 10.766788  | 1.812535  | 0.955081  |
| 88  | 6 | 0 | 13.988804  | -2.936110 | -0.689075 |
| 89  | 6 | 0 | 14.756377  | -1.820596 | -1.363430 |
| 90  | 6 | 0 | -13.765955 | -1.784716 | 2.424102  |
| 91  | 6 | 0 | -13.032102 | -0.782727 | 3.282006  |
| 92  | 6 | 0 | -12.504520 | 0.812662  | -3.761513 |
| 93  | 6 | 0 | -14.033021 | 0.736599  | -3.725041 |
| 94  | 7 | 0 | -14.467332 | -0.315595 | -2.825957 |
| 95  | 7 | 0 | 13.682763  | 2.847735  | 0.085941  |
| 96  | 7 | 0 | 14.668437  | 2.314772  | -0.581310 |
| 97  | 6 | 0 | 14.843742  | 1.033036  | -0.163768 |
| 98  | 6 | 0 | 13.910603  | 0.762145  | 0.808682  |
| 99  | 6 | 0 | -14.577632 | -0.246788 | -1.480669 |
| 100 | 6 | 0 | -14.671946 | -1.558651 | -1.083359 |
| 101 | 7 | 0 | -14.616427 | -2.346713 | -2.190061 |
| 102 | 7 | 0 | -14.485497 | -1.590824 | -3.243300 |
| 103 | 8 | 0 | 15.633360  | -1.226853 | -0.424150 |
| 104 | 8 | 0 | -13.981141 | -1.245341 | 1.139396  |
| 105 | 6 | 0 | -14.716916 | -2.115671 | 0.299701  |
| 106 | 6 | 0 | 15.927178  | 0.132447  | -0.682468 |
| 107 | 1 | 0 | -4.852793  | 1.134630  | 2.061656  |
| 108 | 1 | 0 | -7.243027  | 1.341482  | 2.553133  |
| 109 | 1 | 0 | -7.622123  | -2.939758 | 2.519058  |
| 110 | 1 | 0 | -5.201080  | -3.140158 | 1.997430  |
| 111 | 1 | 0 | 5.765458   | -3.816058 | -0.899028 |
| 112 | 1 | 0 | 8.210822   | -4.240869 | -1.036142 |
| 113 | 1 | 0 | 8.912827   | -1.062234 | 1.761715  |
| 114 | 1 | 0 | 6.488379   | -0.655627 | 1.910126  |
| 115 | 1 | 0 | -2.239183  | -3.657685 | 0.880120  |
| 116 | 1 | 0 | -1.306695  | -5.831591 | 0.221419  |

|     |   |   |            |           |           |
|-----|---|---|------------|-----------|-----------|
| 117 | 1 | 0 | 1.158429   | -6.090312 | -0.118085 |
| 118 | 1 | 0 | 2.659617   | -4.178602 | 0.211371  |
| 119 | 1 | 0 | -1.576800  | 1.094126  | 2.053469  |
| 120 | 1 | 0 | 3.312666   | 0.591196  | 1.324982  |
| 121 | 1 | 0 | -1.254447  | 3.468274  | 2.649332  |
| 122 | 1 | 0 | 3.650889   | 2.966121  | 1.899565  |
| 123 | 1 | 0 | 2.704680   | 5.137239  | 2.577424  |
| 124 | 1 | 0 | 0.251599   | 5.384290  | 2.956644  |
| 125 | 1 | 0 | -6.159675  | 3.021447  | -0.801013 |
| 126 | 1 | 0 | -8.608248  | 3.129598  | -0.385658 |
| 127 | 1 | 0 | -8.823569  | -1.154897 | -0.650974 |
| 128 | 1 | 0 | -6.415391  | -1.253068 | -1.066144 |
| 129 | 1 | 0 | 5.194592   | -1.146222 | -2.796499 |
| 130 | 1 | 0 | 7.634982   | -0.956273 | -2.634651 |
| 131 | 1 | 0 | 7.208752   | 2.751765  | -0.505077 |
| 132 | 1 | 0 | 4.734535   | 2.559733  | -0.686912 |
| 133 | 1 | 0 | -3.280891  | -1.654080 | -1.977985 |
| 134 | 1 | 0 | -2.164700  | -3.739588 | -2.645200 |
| 135 | 1 | 0 | 0.318198   | -3.816960 | -2.893214 |
| 136 | 1 | 0 | 1.665948   | -1.807036 | -2.481500 |
| 137 | 1 | 0 | -2.995082  | 3.101426  | -0.661096 |
| 138 | 1 | 0 | 1.924375   | 2.988447  | -1.322388 |
| 139 | 1 | 0 | -2.856881  | 5.475987  | 0.016262  |
| 140 | 1 | 0 | 2.071098   | 5.377486  | -0.745370 |
| 141 | 1 | 0 | 0.963735   | 7.451708  | -0.013492 |
| 142 | 1 | 0 | -1.499475  | 7.493192  | 0.383903  |
| 143 | 1 | 0 | 10.546536  | -3.206998 | 2.195314  |
| 144 | 1 | 0 | 11.009177  | -1.642215 | 1.459900  |
| 145 | 1 | 0 | 12.881222  | -3.406201 | 1.833196  |
| 146 | 1 | 0 | 12.153889  | -4.255602 | 0.448139  |
| 147 | 1 | 0 | 11.597380  | 1.161821  | -1.294778 |
| 148 | 1 | 0 | 11.732380  | -0.581329 | -0.972302 |
| 149 | 1 | 0 | 9.988301   | -0.117310 | -2.688087 |
| 150 | 1 | 0 | 9.341405   | -0.898550 | -1.223467 |
| 151 | 1 | 0 | -11.405994 | 1.139053  | 3.892377  |
| 152 | 1 | 0 | -10.825099 | -0.371600 | 4.634682  |

|     |   |   |            |           |           |
|-----|---|---|------------|-----------|-----------|
| 153 | 1 | 0 | -9.661106  | 0.963957  | 2.138639  |
| 154 | 1 | 0 | -9.018560  | 1.057227  | 3.802706  |
| 155 | 1 | 0 | -10.781778 | -0.798589 | 0.075198  |
| 156 | 1 | 0 | -12.035146 | 0.421465  | 0.058426  |
| 157 | 1 | 0 | -11.997362 | -1.031154 | -1.984730 |
| 158 | 1 | 0 | -10.421446 | -0.344681 | -2.432907 |
| 159 | 1 | 0 | 12.030542  | 3.221989  | 2.011861  |
| 160 | 1 | 0 | 12.106135  | 1.562219  | 2.635053  |
| 161 | 1 | 0 | 10.631521  | 2.500047  | 0.116376  |
| 162 | 1 | 0 | 9.899964   | 1.914656  | 1.615299  |
| 163 | 1 | 0 | 13.591266  | -3.628558 | -1.444455 |
| 164 | 1 | 0 | 14.668658  | -3.494893 | -0.032135 |
| 165 | 1 | 0 | 14.040438  | -1.087493 | -1.756511 |
| 166 | 1 | 0 | 15.334130  | -2.222371 | -2.206974 |
| 167 | 1 | 0 | -13.179035 | -2.711314 | 2.355855  |
| 168 | 1 | 0 | -14.725343 | -2.020768 | 2.909037  |
| 169 | 1 | 0 | -12.997008 | -1.176730 | 4.308945  |
| 170 | 1 | 0 | -13.584632 | 0.168198  | 3.301672  |
| 171 | 1 | 0 | -12.104238 | -0.097910 | -4.220062 |
| 172 | 1 | 0 | -12.207971 | 1.665481  | -4.379732 |
| 173 | 1 | 0 | -14.434542 | 0.526958  | -4.717478 |
| 174 | 1 | 0 | -14.449430 | 1.678551  | -3.365210 |
| 175 | 1 | 0 | 13.672480  | -0.138537 | 1.351958  |
| 176 | 1 | 0 | -14.532986 | 0.681909  | -0.935141 |
| 177 | 1 | 0 | -14.274495 | -3.120139 | 0.283932  |
| 178 | 1 | 0 | -15.748779 | -2.209548 | 0.668151  |
| 179 | 1 | 0 | 16.867623  | 0.339954  | -0.167242 |
| 180 | 1 | 0 | 16.089758  | 0.319165  | -1.751291 |

---



Cartesian coordinates of (Tet)<sub>2</sub>-CyO<sub>10</sub> at 120 degrees calculated with Gaussian 09 using DFT method at the B3LYP/6-31G level.

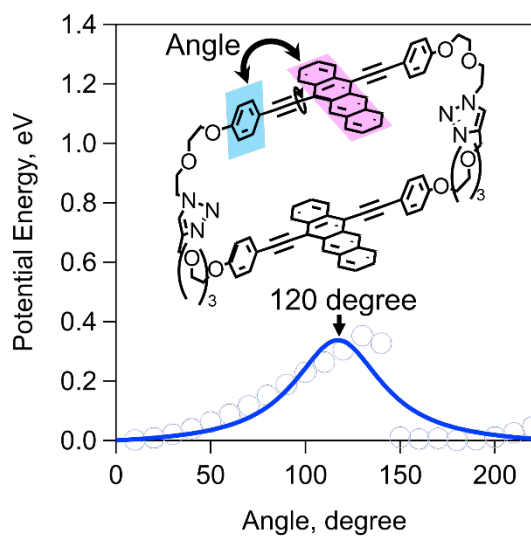

Optimized structure of (Tet)<sub>2</sub>-CyO<sub>10</sub> at 120 degree

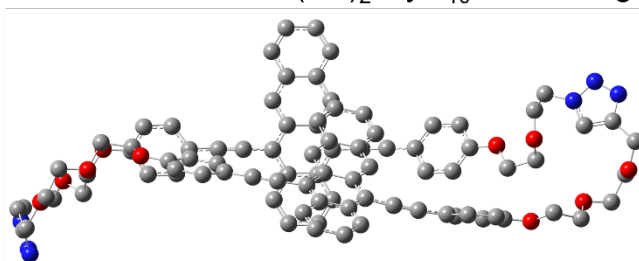

Standard orientation:

| Center Number | Atomic Number | Atomic Type | Coordinates (Angstroms) |           |           |
|---------------|---------------|-------------|-------------------------|-----------|-----------|
|               |               |             | X                       | Y         | Z         |
| 1             | 8             | 0           | 10.035569               | -2.993095 | 0.205103  |
| 2             | 8             | 0           | -8.911459               | -0.809235 | 2.902591  |
| 3             | 6             | 0           | -5.451622               | 0.237444  | 2.178864  |
| 4             | 6             | 0           | -6.808139               | 0.353439  | 2.466305  |
| 5             | 6             | 0           | -7.587355               | -0.798443 | 2.600145  |
| 6             | 6             | 0           | -6.999497               | -2.056932 | 2.419454  |
| 7             | 6             | 0           | -5.651483               | -2.161433 | 2.127593  |
| 8             | 6             | 0           | 6.455457                | -3.219361 | -0.311211 |
| 9             | 6             | 0           | 7.817347                | -3.461185 | -0.392330 |

|    |   |   |            |           |           |
|----|---|---|------------|-----------|-----------|
| 10 | 6 | 0 | 8.712567   | -2.704385 | 0.371106  |
| 11 | 6 | 0 | 8.230018   | -1.687735 | 1.199374  |
| 12 | 6 | 0 | 6.861139   | -1.448892 | 1.270826  |
| 13 | 6 | 0 | -4.848843  | -1.012867 | 2.010801  |
| 14 | 6 | 0 | 5.952883   | -2.213719 | 0.529785  |
| 15 | 6 | 0 | -3.449938  | -1.129560 | 1.740063  |
| 16 | 6 | 0 | 4.543492   | -1.993299 | 0.638497  |
| 17 | 6 | 0 | 3.345279   | -1.839976 | 0.757623  |
| 18 | 6 | 0 | -2.259055  | -1.250130 | 1.538065  |
| 19 | 6 | 0 | -1.170283  | -3.776317 | 0.741213  |
| 20 | 6 | 0 | -0.651465  | -4.979367 | 0.372092  |
| 21 | 6 | 0 | 0.755386   | -5.125913 | 0.175369  |
| 22 | 6 | 0 | 1.590848   | -4.066094 | 0.357679  |
| 23 | 6 | 0 | -0.857164  | -1.393037 | 1.326893  |
| 24 | 6 | 0 | -0.327911  | -2.634734 | 0.944367  |
| 25 | 6 | 0 | 1.085806   | -2.782340 | 0.747081  |
| 26 | 6 | 0 | 1.938753   | -1.684369 | 0.934642  |
| 27 | 6 | 0 | -0.506632  | 0.981695  | 1.909792  |
| 28 | 6 | 0 | -0.000865  | -0.272111 | 1.522091  |
| 29 | 6 | 0 | 1.413533   | -0.419933 | 1.322105  |
| 30 | 6 | 0 | 2.246778   | 0.697970  | 1.503855  |
| 31 | 6 | 0 | -0.184424  | 3.356503  | 2.500366  |
| 32 | 6 | 0 | 0.324380   | 2.074523  | 2.102632  |
| 33 | 6 | 0 | 1.738479   | 1.929626  | 1.886229  |
| 34 | 6 | 0 | 2.582689   | 3.077357  | 2.066957  |
| 35 | 6 | 0 | 2.058581   | 4.274615  | 2.446721  |
| 36 | 6 | 0 | 0.650548   | 4.416465  | 2.671374  |
| 37 | 8 | 0 | 8.916434   | 1.116754  | -1.403295 |
| 38 | 8 | 0 | -10.196979 | 1.185884  | -0.206384 |
| 39 | 6 | 0 | -6.748228  | 2.110008  | -0.771087 |
| 40 | 6 | 0 | -8.110720  | 2.177433  | -0.536678 |
| 41 | 6 | 0 | -8.880170  | 1.008132  | -0.494699 |
| 42 | 6 | 0 | -8.262129  | -0.229762 | -0.697638 |
| 43 | 6 | 0 | -6.893685  | -0.288150 | -0.935576 |
| 44 | 6 | 0 | 5.631301   | -0.286058 | -2.300182 |
| 45 | 6 | 0 | 7.014961   | -0.178914 | -2.204485 |

|    |   |   |            |           |           |
|----|---|---|------------|-----------|-----------|
| 46 | 6 | 0 | 7.580857   | 0.918345  | -1.552036 |
| 47 | 6 | 0 | 6.750920   | 1.905716  | -1.007019 |
| 48 | 6 | 0 | 5.376104   | 1.793686  | -1.111824 |
| 49 | 6 | 0 | -6.114740  | 0.872984  | -0.972614 |
| 50 | 6 | 0 | 4.791248   | 0.692727  | -1.762128 |
| 51 | 6 | 0 | -4.701055  | 0.802788  | -1.167500 |
| 52 | 6 | 0 | 3.369049   | 0.598784  | -1.850547 |
| 53 | 6 | 0 | 2.155989   | 0.581828  | -1.862047 |
| 54 | 6 | 0 | -3.496222  | 0.745328  | -1.302719 |
| 55 | 6 | 0 | -2.204278  | -1.685705 | -2.104716 |
| 56 | 6 | 0 | -1.583270  | -2.839318 | -2.474054 |
| 57 | 6 | 0 | -0.163695  | -2.883965 | -2.620320 |
| 58 | 6 | 0 | 0.585349   | -1.770947 | -2.391006 |
| 59 | 6 | 0 | -2.081738  | 0.700463  | -1.463881 |
| 60 | 6 | 0 | -1.453998  | -0.489973 | -1.859364 |
| 61 | 6 | 0 | -0.027581  | -0.532936 | -2.011233 |
| 62 | 6 | 0 | 0.735275   | 0.619208  | -1.774990 |
| 63 | 6 | 0 | -1.919784  | 3.079117  | -0.810746 |
| 64 | 6 | 0 | -1.317356  | 1.877552  | -1.225573 |
| 65 | 6 | 0 | 0.106671   | 1.840806  | -1.400961 |
| 66 | 6 | 0 | 0.848263   | 3.015990  | -1.185229 |
| 67 | 6 | 0 | -1.783191  | 5.455568  | -0.149921 |
| 68 | 6 | 0 | -1.178167  | 4.229938  | -0.589383 |
| 69 | 6 | 0 | 0.243686   | 4.201875  | -0.799422 |
| 70 | 6 | 0 | 0.997212   | 5.403777  | -0.584234 |
| 71 | 6 | 0 | 0.384605   | 6.547970  | -0.175305 |
| 72 | 6 | 0 | -1.030514  | 6.571840  | 0.052522  |
| 73 | 6 | 0 | 10.921983  | -2.719343 | 1.287444  |
| 74 | 6 | 0 | 12.280721  | -3.273488 | 0.922165  |
| 75 | 8 | 0 | 12.923800  | -2.368374 | 0.048497  |
| 76 | 8 | 0 | 10.833736  | 0.472144  | 0.512284  |
| 77 | 6 | 0 | 11.080129  | 0.290636  | -0.876516 |
| 78 | 6 | 0 | 9.788349   | 0.016223  | -1.616866 |
| 79 | 8 | 0 | -11.726322 | -0.583193 | 2.788469  |
| 80 | 6 | 0 | -10.935848 | 0.166386  | 3.681570  |
| 81 | 6 | 0 | -9.571719  | 0.431105  | 3.091342  |

|     |   |   |            |           |           |
|-----|---|---|------------|-----------|-----------|
| 82  | 6 | 0 | -11.110343 | 0.115091  | -0.428686 |
| 83  | 6 | 0 | -11.359990 | -0.140922 | -1.900768 |
| 84  | 8 | 0 | -11.988790 | 1.002693  | -2.461700 |
| 85  | 7 | 0 | 13.222504  | 1.918318  | 0.936575  |
| 86  | 6 | 0 | 12.034034  | 2.167801  | 1.730058  |
| 87  | 6 | 0 | 10.766788  | 1.812535  | 0.955081  |
| 88  | 6 | 0 | 13.988804  | -2.936110 | -0.689075 |
| 89  | 6 | 0 | 14.756377  | -1.820596 | -1.363430 |
| 90  | 6 | 0 | -13.765955 | -1.784716 | 2.424102  |
| 91  | 6 | 0 | -13.032102 | -0.782727 | 3.282006  |
| 92  | 6 | 0 | -12.504520 | 0.812662  | -3.761513 |
| 93  | 6 | 0 | -14.033021 | 0.736599  | -3.725041 |
| 94  | 7 | 0 | -14.467332 | -0.315595 | -2.825957 |
| 95  | 7 | 0 | 13.682763  | 2.847735  | 0.085941  |
| 96  | 7 | 0 | 14.668437  | 2.314772  | -0.581310 |
| 97  | 6 | 0 | 14.843742  | 1.033036  | -0.163768 |
| 98  | 6 | 0 | 13.910603  | 0.762145  | 0.808682  |
| 99  | 6 | 0 | -14.577632 | -0.246788 | -1.480669 |
| 100 | 6 | 0 | -14.671946 | -1.558651 | -1.083359 |
| 101 | 7 | 0 | -14.616427 | -2.346713 | -2.190061 |
| 102 | 7 | 0 | -14.485497 | -1.590824 | -3.243300 |
| 103 | 8 | 0 | 15.633360  | -1.226853 | -0.424150 |
| 104 | 8 | 0 | -13.981141 | -1.245341 | 1.139396  |
| 105 | 6 | 0 | -14.716916 | -2.115671 | 0.299701  |
| 106 | 6 | 0 | 15.927178  | 0.132447  | -0.682468 |
| 107 | 1 | 0 | -4.852793  | 1.134630  | 2.061656  |
| 108 | 1 | 0 | -7.243027  | 1.341482  | 2.553133  |
| 109 | 1 | 0 | -7.622123  | -2.939758 | 2.519058  |
| 110 | 1 | 0 | -5.201080  | -3.140158 | 1.997430  |
| 111 | 1 | 0 | 5.765458   | -3.816058 | -0.899028 |
| 112 | 1 | 0 | 8.210822   | -4.240869 | -1.036142 |
| 113 | 1 | 0 | 8.912827   | -1.062234 | 1.761715  |
| 114 | 1 | 0 | 6.488379   | -0.655627 | 1.910126  |
| 115 | 1 | 0 | -2.239183  | -3.657685 | 0.880120  |
| 116 | 1 | 0 | -1.306695  | -5.831591 | 0.221419  |
| 117 | 1 | 0 | 1.158429   | -6.090312 | -0.118085 |

|     |   |   |            |           |           |
|-----|---|---|------------|-----------|-----------|
| 118 | 1 | 0 | 2.659617   | -4.178602 | 0.211371  |
| 119 | 1 | 0 | -1.576800  | 1.094126  | 2.053469  |
| 120 | 1 | 0 | 3.312666   | 0.591196  | 1.324982  |
| 121 | 1 | 0 | -1.254447  | 3.468274  | 2.649332  |
| 122 | 1 | 0 | 3.650889   | 2.966121  | 1.899565  |
| 123 | 1 | 0 | 2.704680   | 5.137239  | 2.577424  |
| 124 | 1 | 0 | 0.251599   | 5.384290  | 2.956644  |
| 125 | 1 | 0 | -6.159675  | 3.021447  | -0.801013 |
| 126 | 1 | 0 | -8.608248  | 3.129598  | -0.385658 |
| 127 | 1 | 0 | -8.823569  | -1.154897 | -0.650974 |
| 128 | 1 | 0 | -6.415391  | -1.253068 | -1.066144 |
| 129 | 1 | 0 | 5.194592   | -1.146222 | -2.796499 |
| 130 | 1 | 0 | 7.634982   | -0.956273 | -2.634651 |
| 131 | 1 | 0 | 7.208752   | 2.751765  | -0.505077 |
| 132 | 1 | 0 | 4.734535   | 2.559733  | -0.686912 |
| 133 | 1 | 0 | -3.280891  | -1.654080 | -1.977985 |
| 134 | 1 | 0 | -2.164700  | -3.739588 | -2.645200 |
| 135 | 1 | 0 | 0.318198   | -3.816960 | -2.893214 |
| 136 | 1 | 0 | 1.665948   | -1.807036 | -2.481500 |
| 137 | 1 | 0 | -2.995082  | 3.101426  | -0.661096 |
| 138 | 1 | 0 | 1.924375   | 2.988447  | -1.322388 |
| 139 | 1 | 0 | -2.856881  | 5.475987  | 0.016262  |
| 140 | 1 | 0 | 2.071098   | 5.377486  | -0.745370 |
| 141 | 1 | 0 | 0.963735   | 7.451708  | -0.013492 |
| 142 | 1 | 0 | -1.499475  | 7.493192  | 0.383903  |
| 143 | 1 | 0 | 10.546536  | -3.206998 | 2.195314  |
| 144 | 1 | 0 | 11.009177  | -1.642215 | 1.459900  |
| 145 | 1 | 0 | 12.881222  | -3.406201 | 1.833196  |
| 146 | 1 | 0 | 12.153889  | -4.255602 | 0.448139  |
| 147 | 1 | 0 | 11.597380  | 1.161821  | -1.294778 |
| 148 | 1 | 0 | 11.732380  | -0.581329 | -0.972302 |
| 149 | 1 | 0 | 9.988301   | -0.117310 | -2.688087 |
| 150 | 1 | 0 | 9.341405   | -0.898550 | -1.223467 |
| 151 | 1 | 0 | -11.405994 | 1.139053  | 3.892377  |
| 152 | 1 | 0 | -10.825099 | -0.371600 | 4.634682  |
| 153 | 1 | 0 | -9.661106  | 0.963957  | 2.138639  |

|     |   |   |            |           |           |
|-----|---|---|------------|-----------|-----------|
| 154 | 1 | 0 | -9.018560  | 1.057227  | 3.802706  |
| 155 | 1 | 0 | -10.781778 | -0.798589 | 0.075198  |
| 156 | 1 | 0 | -12.035146 | 0.421465  | 0.058426  |
| 157 | 1 | 0 | -11.997362 | -1.031154 | -1.984730 |
| 158 | 1 | 0 | -10.421446 | -0.344681 | -2.432907 |
| 159 | 1 | 0 | 12.030542  | 3.221989  | 2.011861  |
| 160 | 1 | 0 | 12.106135  | 1.562219  | 2.635053  |
| 161 | 1 | 0 | 10.631521  | 2.500047  | 0.116376  |
| 162 | 1 | 0 | 9.899964   | 1.914656  | 1.615299  |
| 163 | 1 | 0 | 13.591266  | -3.628558 | -1.444455 |
| 164 | 1 | 0 | 14.668658  | -3.494893 | -0.032135 |
| 165 | 1 | 0 | 14.040438  | -1.087493 | -1.756511 |
| 166 | 1 | 0 | 15.334130  | -2.222371 | -2.206974 |
| 167 | 1 | 0 | -13.179035 | -2.711314 | 2.355855  |
| 168 | 1 | 0 | -14.725343 | -2.020768 | 2.909037  |
| 169 | 1 | 0 | -12.997008 | -1.176730 | 4.308945  |
| 170 | 1 | 0 | -13.584632 | 0.168198  | 3.301672  |
| 171 | 1 | 0 | -12.104238 | -0.097910 | -4.220062 |
| 172 | 1 | 0 | -12.207971 | 1.665481  | -4.379732 |
| 173 | 1 | 0 | -14.434542 | 0.526958  | -4.717478 |
| 174 | 1 | 0 | -14.449430 | 1.678551  | -3.365210 |
| 175 | 1 | 0 | 13.672480  | -0.138537 | 1.351958  |
| 176 | 1 | 0 | -14.532986 | 0.681909  | -0.935141 |
| 177 | 1 | 0 | -14.274495 | -3.120139 | 0.283932  |
| 178 | 1 | 0 | -15.748779 | -2.209548 | 0.668151  |
| 179 | 1 | 0 | 16.867623  | 0.339954  | -0.167242 |
| 180 | 1 | 0 | 16.089758  | 0.319165  | -1.751291 |

---

Cartesian coordinates of (Tet)<sub>2</sub>-CyO<sub>10</sub> at 220 degrees calculated with Gaussian 09 using DFT method at the B3LYP/6-31G level.

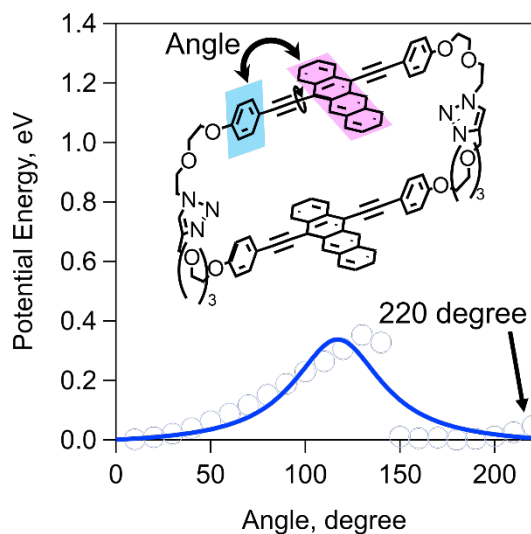

Optimized structure of (Tet)<sub>2</sub>-CyO<sub>10</sub> at 220 degree

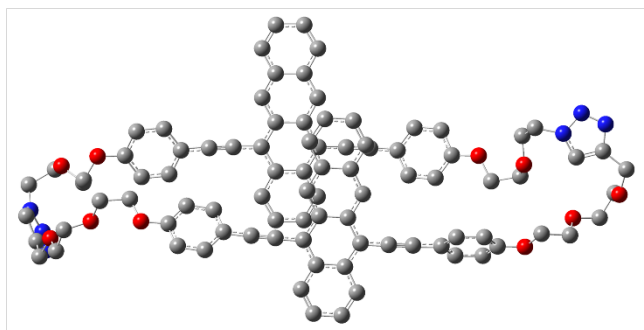

Standard orientation:

| Center Number | Atomic Number | Atomic Type | Coordinates (Angstroms) |           |           |
|---------------|---------------|-------------|-------------------------|-----------|-----------|
|               |               |             | X                       | Y         | Z         |
| 1             | 8             | 0           | 10.035569               | -2.993095 | 0.205103  |
| 2             | 8             | 0           | -8.911459               | -0.809235 | 2.902591  |
| 3             | 6             | 0           | -5.451622               | 0.237444  | 2.178864  |
| 4             | 6             | 0           | -6.808139               | 0.353439  | 2.466305  |
| 5             | 6             | 0           | -7.587355               | -0.798443 | 2.600145  |
| 6             | 6             | 0           | -6.999497               | -2.056932 | 2.419454  |
| 7             | 6             | 0           | -5.651483               | -2.161433 | 2.127593  |
| 8             | 6             | 0           | 6.455457                | -3.219361 | -0.311211 |
| 9             | 6             | 0           | 7.817347                | -3.461185 | -0.392330 |

|    |   |   |            |           |           |
|----|---|---|------------|-----------|-----------|
| 10 | 6 | 0 | 8.712567   | -2.704385 | 0.371106  |
| 11 | 6 | 0 | 8.230018   | -1.687735 | 1.199374  |
| 12 | 6 | 0 | 6.861139   | -1.448892 | 1.270826  |
| 13 | 6 | 0 | -4.848843  | -1.012867 | 2.010801  |
| 14 | 6 | 0 | 5.952883   | -2.213719 | 0.529785  |
| 15 | 6 | 0 | -3.449938  | -1.129560 | 1.740063  |
| 16 | 6 | 0 | 4.543492   | -1.993299 | 0.638497  |
| 17 | 6 | 0 | 3.345279   | -1.839976 | 0.757623  |
| 18 | 6 | 0 | -2.259055  | -1.250130 | 1.538065  |
| 19 | 6 | 0 | -1.170283  | -3.776317 | 0.741213  |
| 20 | 6 | 0 | -0.651465  | -4.979367 | 0.372092  |
| 21 | 6 | 0 | 0.755386   | -5.125913 | 0.175369  |
| 22 | 6 | 0 | 1.590848   | -4.066094 | 0.357679  |
| 23 | 6 | 0 | -0.857164  | -1.393037 | 1.326893  |
| 24 | 6 | 0 | -0.327911  | -2.634734 | 0.944367  |
| 25 | 6 | 0 | 1.085806   | -2.782340 | 0.747081  |
| 26 | 6 | 0 | 1.938753   | -1.684369 | 0.934642  |
| 27 | 6 | 0 | -0.506632  | 0.981695  | 1.909792  |
| 28 | 6 | 0 | -0.000865  | -0.272111 | 1.522091  |
| 29 | 6 | 0 | 1.413533   | -0.419933 | 1.322105  |
| 30 | 6 | 0 | 2.246778   | 0.697970  | 1.503855  |
| 31 | 6 | 0 | -0.184424  | 3.356503  | 2.500366  |
| 32 | 6 | 0 | 0.324380   | 2.074523  | 2.102632  |
| 33 | 6 | 0 | 1.738479   | 1.929626  | 1.886229  |
| 34 | 6 | 0 | 2.582689   | 3.077357  | 2.066957  |
| 35 | 6 | 0 | 2.058581   | 4.274615  | 2.446721  |
| 36 | 6 | 0 | 0.650548   | 4.416465  | 2.671374  |
| 37 | 8 | 0 | 8.916434   | 1.116754  | -1.403295 |
| 38 | 8 | 0 | -10.196979 | 1.185884  | -0.206384 |
| 39 | 6 | 0 | -6.748228  | 2.110008  | -0.771087 |
| 40 | 6 | 0 | -8.110720  | 2.177433  | -0.536678 |
| 41 | 6 | 0 | -8.880170  | 1.008132  | -0.494699 |
| 42 | 6 | 0 | -8.262129  | -0.229762 | -0.697638 |
| 43 | 6 | 0 | -6.893685  | -0.288150 | -0.935576 |
| 44 | 6 | 0 | 5.631301   | -0.286058 | -2.300182 |
| 45 | 6 | 0 | 7.014961   | -0.178914 | -2.204485 |



|    |   |   |            |           |           |
|----|---|---|------------|-----------|-----------|
| 46 | 6 | 0 | 7.580857   | 0.918345  | -1.552036 |
| 47 | 6 | 0 | 6.750920   | 1.905716  | -1.007019 |
| 48 | 6 | 0 | 5.376104   | 1.793686  | -1.111824 |
| 49 | 6 | 0 | -6.114740  | 0.872984  | -0.972614 |
| 50 | 6 | 0 | 4.791248   | 0.692727  | -1.762128 |
| 51 | 6 | 0 | -4.701055  | 0.802788  | -1.167500 |
| 52 | 6 | 0 | 3.369049   | 0.598784  | -1.850547 |
| 53 | 6 | 0 | 2.155989   | 0.581828  | -1.862047 |
| 54 | 6 | 0 | -3.496222  | 0.745328  | -1.302719 |
| 55 | 6 | 0 | -2.204278  | -1.685705 | -2.104716 |
| 56 | 6 | 0 | -1.583270  | -2.839318 | -2.474054 |
| 57 | 6 | 0 | -0.163695  | -2.883965 | -2.620320 |
| 58 | 6 | 0 | 0.585349   | -1.770947 | -2.391006 |
| 59 | 6 | 0 | -2.081738  | 0.700463  | -1.463881 |
| 60 | 6 | 0 | -1.453998  | -0.489973 | -1.859364 |
| 61 | 6 | 0 | -0.027581  | -0.532936 | -2.011233 |
| 62 | 6 | 0 | 0.735275   | 0.619208  | -1.774990 |
| 63 | 6 | 0 | -1.919784  | 3.079117  | -0.810746 |
| 64 | 6 | 0 | -1.317356  | 1.877552  | -1.225573 |
| 65 | 6 | 0 | 0.106671   | 1.840806  | -1.400961 |
| 66 | 6 | 0 | 0.848263   | 3.015990  | -1.185229 |
| 67 | 6 | 0 | -1.783191  | 5.455568  | -0.149921 |
| 68 | 6 | 0 | -1.178167  | 4.229938  | -0.589383 |
| 69 | 6 | 0 | 0.243686   | 4.201875  | -0.799422 |
| 70 | 6 | 0 | 0.997212   | 5.403777  | -0.584234 |
| 71 | 6 | 0 | 0.384605   | 6.547970  | -0.175305 |
| 72 | 6 | 0 | -1.030514  | 6.571840  | 0.052522  |
| 73 | 6 | 0 | 10.921983  | -2.719343 | 1.287444  |
| 74 | 6 | 0 | 12.280721  | -3.273488 | 0.922165  |
| 75 | 8 | 0 | 12.923800  | -2.368374 | 0.048497  |
| 76 | 8 | 0 | 10.833736  | 0.472144  | 0.512284  |
| 77 | 6 | 0 | 11.080129  | 0.290636  | -0.876516 |
| 78 | 6 | 0 | 9.788349   | 0.016223  | -1.616866 |
| 79 | 8 | 0 | -11.726322 | -0.583193 | 2.788469  |
| 80 | 6 | 0 | -10.935848 | 0.166386  | 3.681570  |
| 81 | 6 | 0 | -9.571719  | 0.431105  | 3.091342  |

|     |   |   |            |           |           |
|-----|---|---|------------|-----------|-----------|
| 82  | 6 | 0 | -11.110343 | 0.115091  | -0.428686 |
| 83  | 6 | 0 | -11.359990 | -0.140922 | -1.900768 |
| 84  | 8 | 0 | -11.988790 | 1.002693  | -2.461700 |
| 85  | 7 | 0 | 13.222504  | 1.918318  | 0.936575  |
| 86  | 6 | 0 | 12.034034  | 2.167801  | 1.730058  |
| 87  | 6 | 0 | 10.766788  | 1.812535  | 0.955081  |
| 88  | 6 | 0 | 13.988804  | -2.936110 | -0.689075 |
| 89  | 6 | 0 | 14.756377  | -1.820596 | -1.363430 |
| 90  | 6 | 0 | -13.765955 | -1.784716 | 2.424102  |
| 91  | 6 | 0 | -13.032102 | -0.782727 | 3.282006  |
| 92  | 6 | 0 | -12.504520 | 0.812662  | -3.761513 |
| 93  | 6 | 0 | -14.033021 | 0.736599  | -3.725041 |
| 94  | 7 | 0 | -14.467332 | -0.315595 | -2.825957 |
| 95  | 7 | 0 | 13.682763  | 2.847735  | 0.085941  |
| 96  | 7 | 0 | 14.668437  | 2.314772  | -0.581310 |
| 97  | 6 | 0 | 14.843742  | 1.033036  | -0.163768 |
| 98  | 6 | 0 | 13.910603  | 0.762145  | 0.808682  |
| 99  | 6 | 0 | -14.577632 | -0.246788 | -1.480669 |
| 100 | 6 | 0 | -14.671946 | -1.558651 | -1.083359 |
| 101 | 7 | 0 | -14.616427 | -2.346713 | -2.190061 |
| 102 | 7 | 0 | -14.485497 | -1.590824 | -3.243300 |
| 103 | 8 | 0 | 15.633360  | -1.226853 | -0.424150 |
| 104 | 8 | 0 | -13.981141 | -1.245341 | 1.139396  |
| 105 | 6 | 0 | -14.716916 | -2.115671 | 0.299701  |
| 106 | 6 | 0 | 15.927178  | 0.132447  | -0.682468 |
| 107 | 1 | 0 | -4.852793  | 1.134630  | 2.061656  |
| 108 | 1 | 0 | -7.243027  | 1.341482  | 2.553133  |
| 109 | 1 | 0 | -7.622123  | -2.939758 | 2.519058  |
| 110 | 1 | 0 | -5.201080  | -3.140158 | 1.997430  |
| 111 | 1 | 0 | 5.765458   | -3.816058 | -0.899028 |
| 112 | 1 | 0 | 8.210822   | -4.240869 | -1.036142 |
| 113 | 1 | 0 | 8.912827   | -1.062234 | 1.761715  |
| 114 | 1 | 0 | 6.488379   | -0.655627 | 1.910126  |
| 115 | 1 | 0 | -2.239183  | -3.657685 | 0.880120  |
| 116 | 1 | 0 | -1.306695  | -5.831591 | 0.221419  |
| 117 | 1 | 0 | 1.158429   | -6.090312 | -0.118085 |

|     |   |   |            |           |           |
|-----|---|---|------------|-----------|-----------|
| 118 | 1 | 0 | 2.659617   | -4.178602 | 0.211371  |
| 119 | 1 | 0 | -1.576800  | 1.094126  | 2.053469  |
| 120 | 1 | 0 | 3.312666   | 0.591196  | 1.324982  |
| 121 | 1 | 0 | -1.254447  | 3.468274  | 2.649332  |
| 122 | 1 | 0 | 3.650889   | 2.966121  | 1.899565  |
| 123 | 1 | 0 | 2.704680   | 5.137239  | 2.577424  |
| 124 | 1 | 0 | 0.251599   | 5.384290  | 2.956644  |
| 125 | 1 | 0 | -6.159675  | 3.021447  | -0.801013 |
| 126 | 1 | 0 | -8.608248  | 3.129598  | -0.385658 |
| 127 | 1 | 0 | -8.823569  | -1.154897 | -0.650974 |
| 128 | 1 | 0 | -6.415391  | -1.253068 | -1.066144 |
| 129 | 1 | 0 | 5.194592   | -1.146222 | -2.796499 |
| 130 | 1 | 0 | 7.634982   | -0.956273 | -2.634651 |
| 131 | 1 | 0 | 7.208752   | 2.751765  | -0.505077 |
| 132 | 1 | 0 | 4.734535   | 2.559733  | -0.686912 |
| 133 | 1 | 0 | -3.280891  | -1.654080 | -1.977985 |
| 134 | 1 | 0 | -2.164700  | -3.739588 | -2.645200 |
| 135 | 1 | 0 | 0.318198   | -3.816960 | -2.893214 |
| 136 | 1 | 0 | 1.665948   | -1.807036 | -2.481500 |
| 137 | 1 | 0 | -2.995082  | 3.101426  | -0.661096 |
| 138 | 1 | 0 | 1.924375   | 2.988447  | -1.322388 |
| 139 | 1 | 0 | -2.856881  | 5.475987  | 0.016262  |
| 140 | 1 | 0 | 2.071098   | 5.377486  | -0.745370 |
| 141 | 1 | 0 | 0.963735   | 7.451708  | -0.013492 |
| 142 | 1 | 0 | -1.499475  | 7.493192  | 0.383903  |
| 143 | 1 | 0 | 10.546536  | -3.206998 | 2.195314  |
| 144 | 1 | 0 | 11.009177  | -1.642215 | 1.459900  |
| 145 | 1 | 0 | 12.881222  | -3.406201 | 1.833196  |
| 146 | 1 | 0 | 12.153889  | -4.255602 | 0.448139  |
| 147 | 1 | 0 | 11.597380  | 1.161821  | -1.294778 |
| 148 | 1 | 0 | 11.732380  | -0.581329 | -0.972302 |
| 149 | 1 | 0 | 9.988301   | -0.117310 | -2.688087 |
| 150 | 1 | 0 | 9.341405   | -0.898550 | -1.223467 |
| 151 | 1 | 0 | -11.405994 | 1.139053  | 3.892377  |
| 152 | 1 | 0 | -10.825099 | -0.371600 | 4.634682  |
| 153 | 1 | 0 | -9.661106  | 0.963957  | 2.138639  |

|     |   |   |            |           |           |
|-----|---|---|------------|-----------|-----------|
| 154 | 1 | 0 | -9.018560  | 1.057227  | 3.802706  |
| 155 | 1 | 0 | -10.781778 | -0.798589 | 0.075198  |
| 156 | 1 | 0 | -12.035146 | 0.421465  | 0.058426  |
| 157 | 1 | 0 | -11.997362 | -1.031154 | -1.984730 |
| 158 | 1 | 0 | -10.421446 | -0.344681 | -2.432907 |
| 159 | 1 | 0 | 12.030542  | 3.221989  | 2.011861  |
| 160 | 1 | 0 | 12.106135  | 1.562219  | 2.635053  |
| 161 | 1 | 0 | 10.631521  | 2.500047  | 0.116376  |
| 162 | 1 | 0 | 9.899964   | 1.914656  | 1.615299  |
| 163 | 1 | 0 | 13.591266  | -3.628558 | -1.444455 |
| 164 | 1 | 0 | 14.668658  | -3.494893 | -0.032135 |
| 165 | 1 | 0 | 14.040438  | -1.087493 | -1.756511 |
| 166 | 1 | 0 | 15.334130  | -2.222371 | -2.206974 |
| 167 | 1 | 0 | -13.179035 | -2.711314 | 2.355855  |
| 168 | 1 | 0 | -14.725343 | -2.020768 | 2.909037  |
| 169 | 1 | 0 | -12.997008 | -1.176730 | 4.308945  |
| 170 | 1 | 0 | -13.584632 | 0.168198  | 3.301672  |
| 171 | 1 | 0 | -12.104238 | -0.097910 | -4.220062 |
| 172 | 1 | 0 | -12.207971 | 1.665481  | -4.379732 |
| 173 | 1 | 0 | -14.434542 | 0.526958  | -4.717478 |
| 174 | 1 | 0 | -14.449430 | 1.678551  | -3.365210 |
| 175 | 1 | 0 | 13.672480  | -0.138537 | 1.351958  |
| 176 | 1 | 0 | -14.532986 | 0.681909  | -0.935141 |
| 177 | 1 | 0 | -14.274495 | -3.120139 | 0.283932  |
| 178 | 1 | 0 | -15.748779 | -2.209548 | 0.668151  |
| 179 | 1 | 0 | 16.867623  | 0.339954  | -0.167242 |
| 180 | 1 | 0 | 16.089758  | 0.319165  | -1.751291 |

---

DFT-computed energy landscape scanning over rotation of one pentacene–phenylene dihedral angles of (Tet)<sub>2</sub>-CyO<sub>10</sub> calculated with Gaussian 09 using DFT method at the B3LYP/6-31G level.

| Angle, degree | Total Energy (Hartree) | Potential Energy, eV |
|---------------|------------------------|----------------------|
| 0             | -4553.32775777         | 0.00                 |
| 10            | -4553.32769680         | 0.00                 |
| 20            | -4553.32743358         | 0.01                 |
| 30            | -4553.32699047         | 0.02                 |
| 40            | -4553.32632195         | 0.04                 |
| 50            | -4553.32545602         | 0.06                 |
| 60            | -4553.32452998         | 0.09                 |
| 70            | -4553.32348054         | 0.12                 |
| 80            | -4553.32219640         | 0.15                 |
| 90            | -4553.32083514         | 0.19                 |
| 100           | -4553.31932435         | 0.23                 |
| 110           | -4553.31806889         | 0.26                 |
| 120           | -4553.31653586         | 0.31                 |
| 130           | -4553.31482110         | 0.35                 |
| 140           | -4553.31573227         | 0.33                 |
| 150           | -4553.32737406         | 0.01                 |
| 160           | -4553.32757187         | 0.01                 |
| 170           | -4553.32749051         | 0.01                 |
| 180           | -4553.32775344         | 0.00                 |
| 190           | -4553.32765484         | 0.00                 |
| 200           | -4553.32733476         | 0.01                 |
| 210           | -4553.32682181         | 0.03                 |
| 220           | -4553.32606264         | 0.05                 |

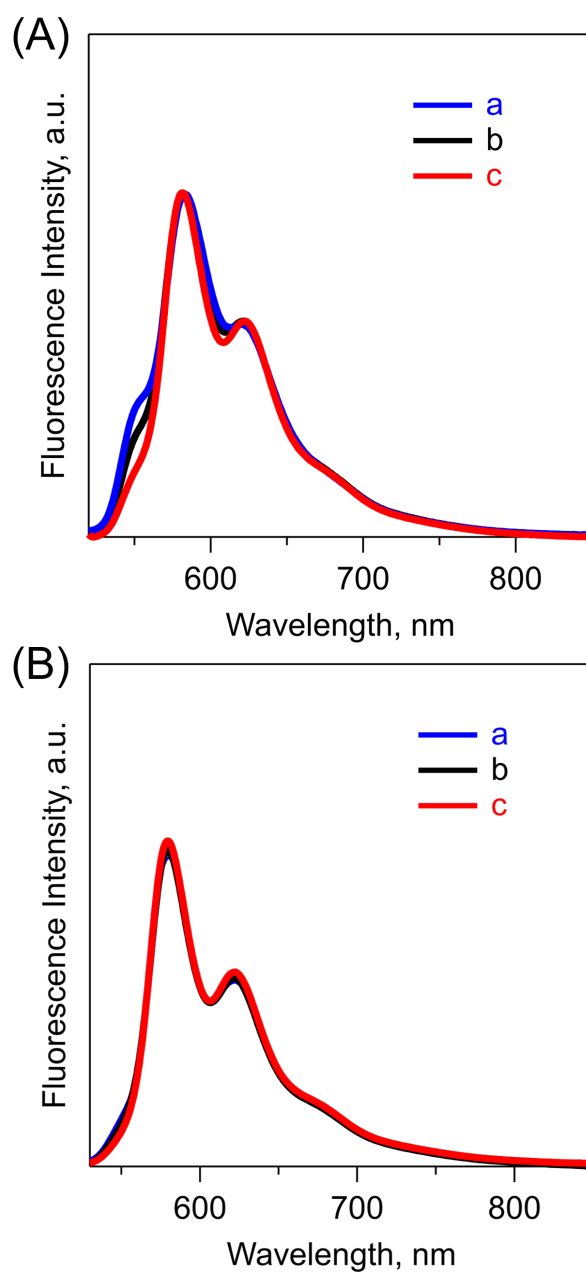

**Fig. S59** (A) Normalized fluorescence emission spectra of  $(\text{Tet})_2\text{-CyO}_{10}$  upon excitation at (a) 340 nm, (b) 480 nm and (c) 515 nm in THF. (B) Normalized fluorescence spectra of  $(\text{Tet})_2\text{-CyO}_{12}$  upon excitation at (a) 360 nm, (b) 480 nm and (c) 520 nm in THF.

In contrast with the no spectral changes of  $(\text{Tet})_2\text{-CyO}_{12}$ , the emission intensity of  $(\text{Tet})_2\text{-CyO}_{10}$  derived from the *H*-type excited state complex (at ca. 550 nm) is relatively higher at the shorter excitation wavelength at 340 nm. Since the *H*-type excited state complex

should be a competitive reaction with ISF, the ISF becomes more efficient at the longer excitation wavelength. Our picosecond transient absorption measurement (ps-TAS) system has two different excitation wavelengths such as 355 and 532 nm. Therefore, 532 nm is appropriate for high-yield ISF because the *H*-type excited state complex is relatively suppressed.

**Table S1** Summarized emission quantum yields in THF

|                    | Tet-ref | (Tet) <sub>2</sub> -CyO <sub>10</sub> | (Tet) <sub>2</sub> -CyO <sub>12</sub> |
|--------------------|---------|---------------------------------------|---------------------------------------|
| $\Phi_{\text{FL}}$ | 0.73    | 0.16                                  | 0.21                                  |

**Table S2** Summarized fluorescence lifetimes in (Tet)<sub>2</sub>-CyO<sub>*n*</sub> and Tet-ref in THF

|                                       | $\lambda_{\text{obs}}$ (nm) | $\tau_1$ (ns) | $\tau_2$ (ns) | $\tau_3$ (ns) |
|---------------------------------------|-----------------------------|---------------|---------------|---------------|
| Tet-ref                               | 575                         | 7.6           | –             | –             |
| (Tet) <sub>2</sub> -CyO <sub>12</sub> | 580                         | 0.72          | 13.7          | –             |
| (Tet) <sub>2</sub> -CyO <sub>10</sub> | 582                         | 0.59          | 6.6           | 15.2          |

First, fluorescence decay profiles of Tet-ref (line a: gray) and (Tet)<sub>2</sub>-CyO<sub>12</sub> (line b: red) in THF were evaluated (Fig. 4). The fluorescence lifetimes of (Tet)<sub>2</sub>-CyO<sub>12</sub> were determined to be 0.72 ns and 13.7 ns by di-exponential function. This is in contrast with that of Tet-ref, which was evaluated by mono-exponential function ( $\tau_{\text{S}} = 7.6$  ns). Therefore,  $\tau_1$  and  $\tau_2$  corresponds to ISF and TTA, respectively. Next, the fluorescence lifetimes ( $\tau_{\text{S}}$ ) of (Tet)<sub>2</sub>-CyO<sub>10</sub> (line c : blue) in THF were calculated by tri-exponential fitting of the corresponding decay profiles. In addition to the first component: ISF and the second component: TTA, the third component is attributable with the emission process derived from the *H*-type excited complex (*H*-Comp). Finally, the kinetic values such as rate constants of ISF ( $k_{\text{ISF}}$ ), TTA ( $k_{\text{TTA}}$ ), *H*-Comp formation ( $k_{\text{Comp}}$ ) and emission from *H*-Comp ( $k_{\text{Lum}}$ ) were estimated by performing target analysis on the transient absorption with reference to the above lifetimes estimated for Tet compounds. The calculated values of the rate constants were summarized in Table 1 in the text.

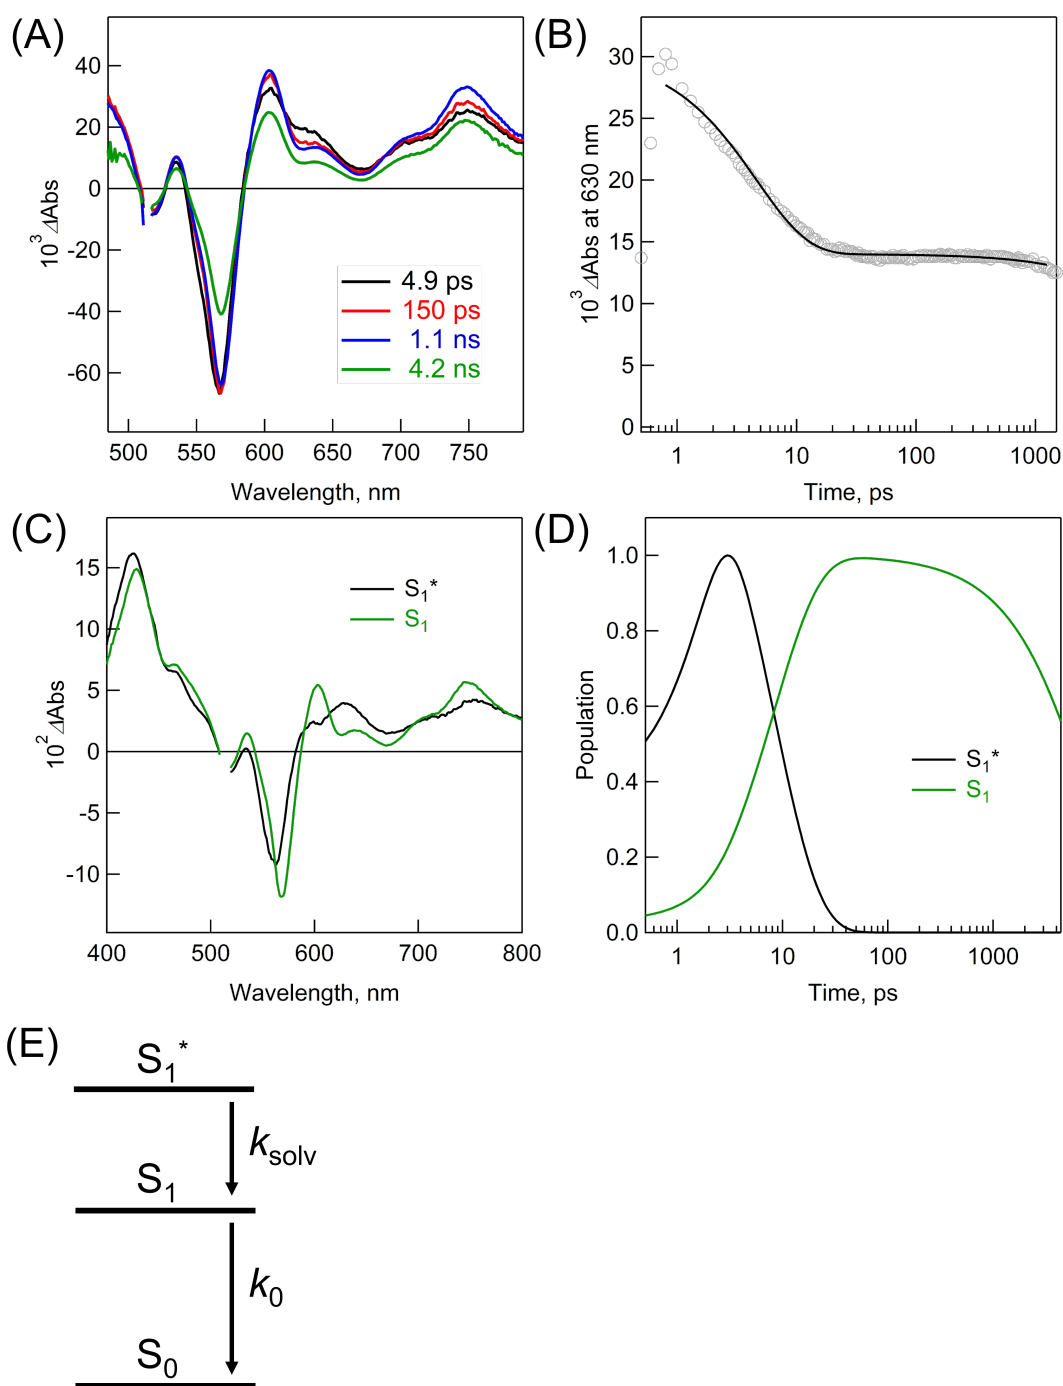

**Fig. S60** (A) fs-TAS of Tet-ref in THF ( $\lambda_{\text{ex}} = 515 \text{ nm}$ ). (B) Time profile at 602 nm. (C) The species-associated spectra of the initial singlet excited state ( $S_1^*$ ) (black line) and solvent-relaxed  $S_1$  ( $S_1$ ) (green line). (D) Time-dependent population profiles of  $S_1^*$  (black line) and  $S_1$  (green line). (E) A kinetic model for target analysis of Tet-ref.



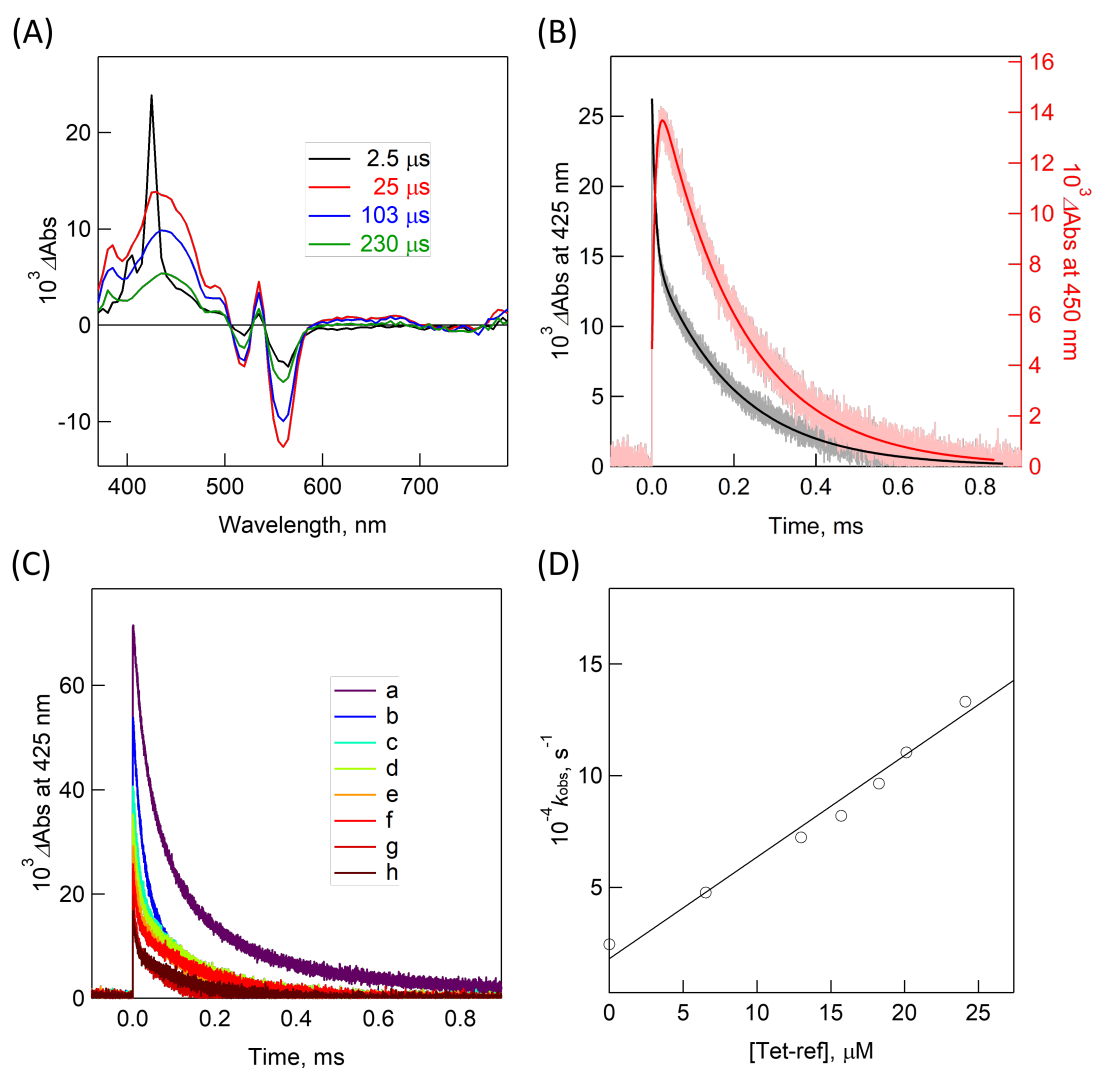

**Fig. S61** (A) Nanosecond transient absorption spectra (ns-TAS) of anthracene (ca. 200  $\mu\text{M}$ ) in the presence of Tet-ref (24  $\mu\text{M}$ ) excited at 355 nm in THF. (B) The corresponding time profiles at 425 nm and 450 nm. (C) The time profiles of absorption at 425 nm in the presence of different concentrations of Tet-ref. (a) 0  $\mu\text{M}$ , (b) 6.5  $\mu\text{M}$ , (c) 13  $\mu\text{M}$ , (d) 16  $\mu\text{M}$ , (e) 18  $\mu\text{M}$ , (f) 20  $\mu\text{M}$ , (g) 24  $\mu\text{M}$  and (h) 27  $\mu\text{M}$ . (D) The pseudo-first order plot versus the concentration of Tet-ref monitored at 425 nm. The rate constant of energy transfer was determined to be  $4.5 \times 10^9 \text{ M}^{-1} \text{ s}^{-1}$ .

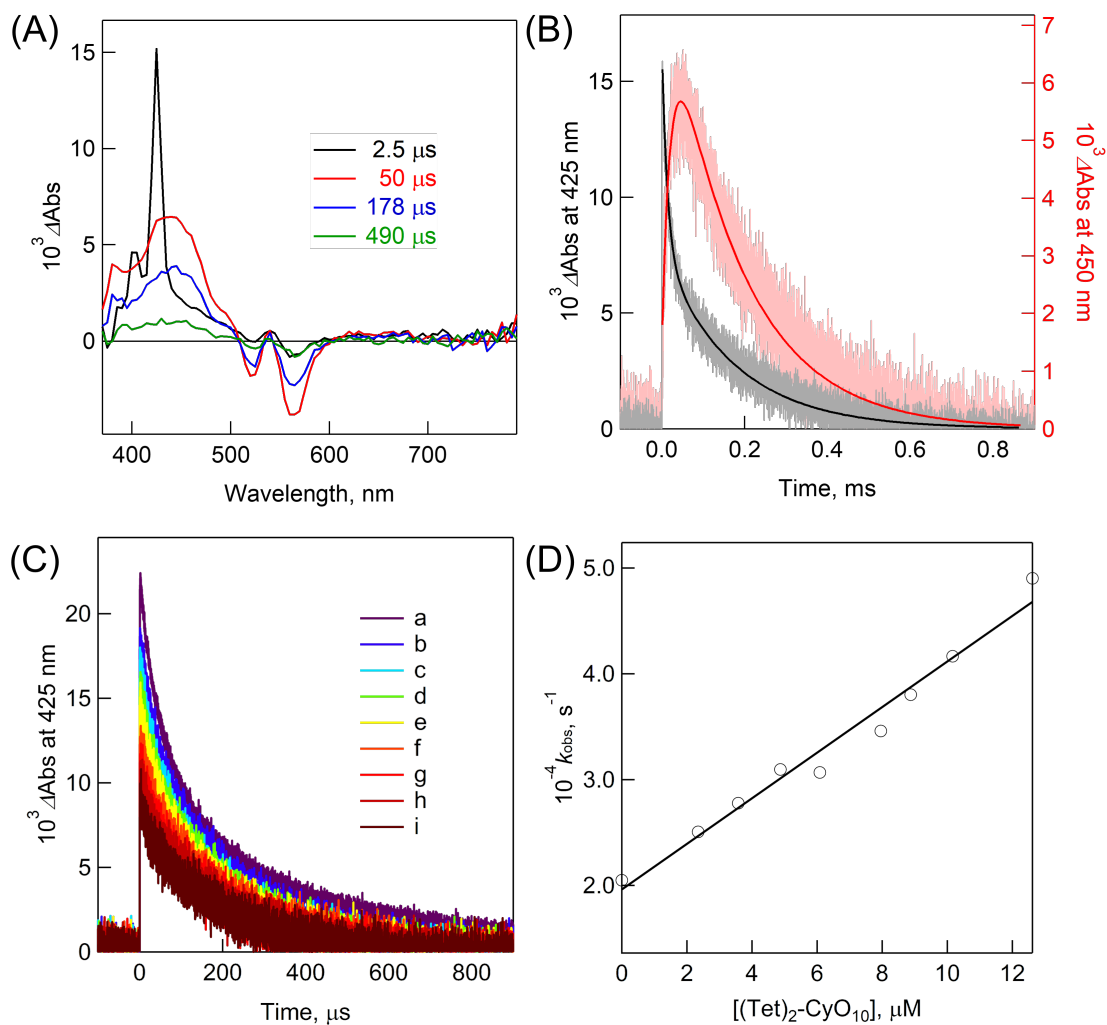

**Fig. S62** (A) Nanosecond transient absorption spectra (ns-TAS) of anthracene (ca. 200 μM) in the presence of (Tet)<sub>2</sub>-CyO<sub>10</sub> (6.1 μM) excited at 355 nm in THF. (B) The corresponding time profiles at 425 nm and 450 nm. (C) The time profiles of absorption at 425 nm in the presence of different concentrations of (Tet)<sub>2</sub>-CyO<sub>10</sub>. (a) 0 μM, (b) 2.3 μM, (c) 3.6 μM, (d) 4.9 μM, (e) 6.1 μM, (f) 8.0 μM, (g) 8.9 μM, (h) 10 μM and (i) 13 μM. (D) The pseudo-first order plot vs. the concentration of (Tet)<sub>2</sub>-CyO<sub>10</sub> monitored at 430 nm. The rate constant of energy transfer was determined to be  $2.1 \times 10^9 \text{ M}^{-1} \text{ s}^{-1}$ .

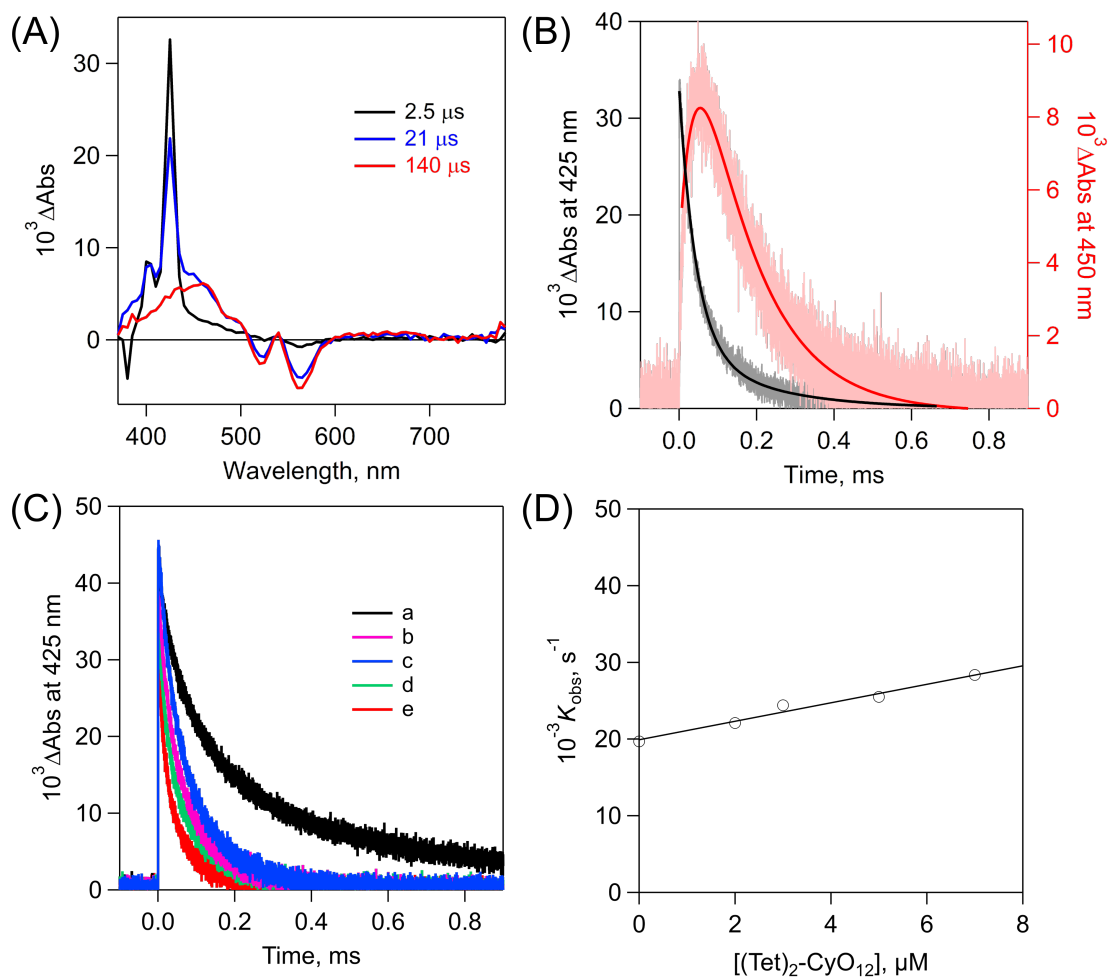

**Fig. S63** (A) Nanosecond transient absorption spectra (ns-TAS) of anthracene (ca. 300 μM) in the presence of (Tet)<sub>2</sub>-CyO<sub>12</sub> (5.0 μM) excited at 355 nm in THF. (B) The corresponding time profiles at 425 nm and 435 nm. (C) The time profiles of absorption at 425 nm in the presence of different concentrations of Tet-ref. (a) 0 μM, (b) 2.0 μM, (c) 5.0 μM, and (d) 7.0 μM. (D) The pseudo-first order plot vs. the concentration of (Tet)<sub>2</sub>-CyO<sub>12</sub> monitored at 450 nm. The rate constant of energy transfer was determined to be  $4.0 \times 10^9 \text{ M}^{-1} \text{ s}^{-1}$ .

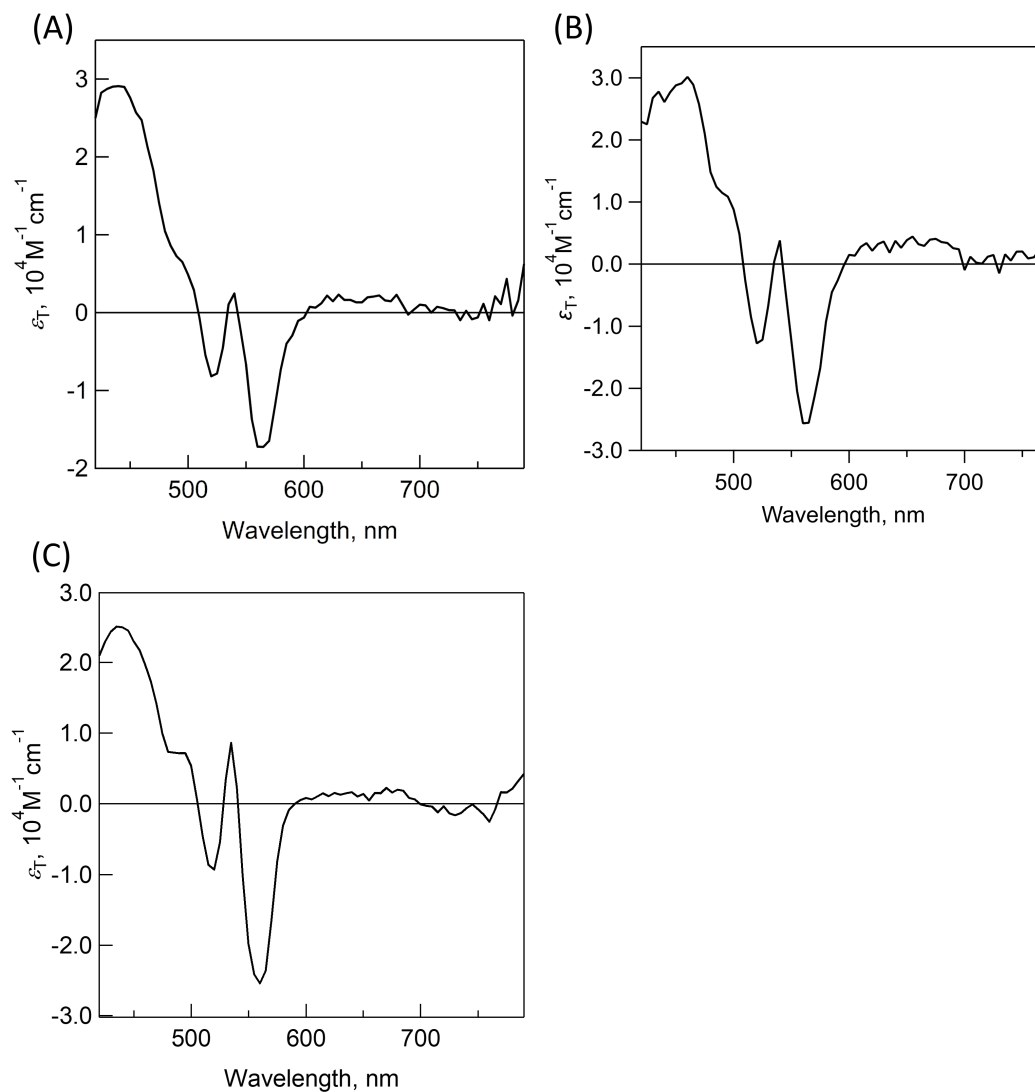

**Fig. S64** Sensitized T-T absorption spectra of (A)  $(\text{Tet})_2\text{-CyO}_{10}$ , (B)  $(\text{Tet})_2\text{-CyO}_{12}$ , and (C) Tet-ref in THF ( $\lambda_{\text{ex}} = 355 \text{ nm}$ , sensitizer: anthracene). The extinction coefficient of T-T absorption ( $\epsilon_T$ ) of (A)  $(\text{Tet})_2\text{-CyO}_{10}$  is  $27,600 \text{ M}^{-1} \text{ cm}^{-1}$  at 450 nm, (B) that of  $(\text{Tet})_2\text{-CyO}_{12}$  is  $28,800 \text{ M}^{-1} \text{ cm}^{-1}$  at 450 nm, and that of Tet-ref is  $23,000 \text{ M}^{-1} \text{ cm}^{-1}$  at 450 nm.

## Calculation Processes of Triplet Yields

### 1. Concentration of Excited Singlet States<sup>8</sup>

Concentrations of the excited singlet states ( $[^1S]$ ) of Tet derivatives were calculated by analyzing ps-TAS. When the solution in a cuvette is irradiated by the pump laser, the fraction of light intensity transmitted ( $I/I_0$ ) through a solution can be calculated as follows:

$$(I/I_0) = 1 - 10^{-\text{Abs}(532 \text{ nm})}$$

Where  $\text{Abs}(532 \text{ nm})$  represents absorbance at 532 nm in absorption measurement. The calculation of  $[^1S]$  depends on the total number of photons per pump pulse:

$$(\text{photons}) / (\text{pulse}) = (\text{laser power}) / [(\text{repetition rate}) \times (\text{energy per photon})]$$

We assumed the number of absorbed photons in the photo-interaction volume is equal to the initial population of the excited molecules. Then, a cylindrical volume ( $V$ ) was calculated by the excitation spot area times the call path length ( $d$ ), that is:

$$V = (\pi \times r^2) \times d = \pi \times (0.1 \text{ cm})^2 \times [(0.2 \text{ cm}) \times (0.001 \text{ L cm}^{-3})] = 6.28 \times 10^{-6} \text{ L}$$

Where  $r$  is the laser radius. Based on these values,  $[^1S]$  can be calculated as follows:

$$[^1S] = [(\text{photon} / \text{pulse}) \times (I/I_0)] / (N_A \times V)$$

Where  $N_A$  is Avogadro constant ( $N_A = 6.022 \times 10^{23} \text{ mol}^{-1}$ ). The values of  $[^1S]$  obtained here are summarized in Table S3.

**Table S3** Concentrations of excited singlet states.

|                                       | $[^1S^*]$ (M)        |
|---------------------------------------|----------------------|
| (Tet) <sub>2</sub> -CyO <sub>10</sub> | $7.8 \times 10^{-7}$ |
| (Tet) <sub>2</sub> -CyO <sub>12</sub> | $9.0 \times 10^{-8}$ |
| Tet-ref                               | $2.7 \times 10^{-7}$ |

### 2. Concentrations of Excited Triplet States<sup>9, 10</sup>

The energy transfer (EnT) method was utilized to determine the extinction coefficient of the triplet excited state of Tet derivatives. The kinetic model is represented as follows:

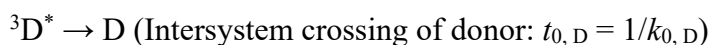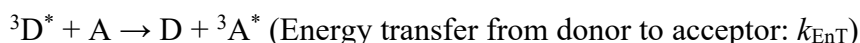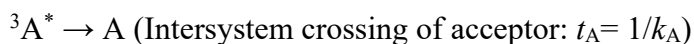

Where D and A are the energy donor and acceptor, respectively. The quantum yield of EnT and related equations are

$$\Phi_{\text{EnT}} = k_{\text{EnT}}[\text{A}] / (k_{\text{EnT}}[\text{A}] + k_{0, \text{D}})$$

$$\varepsilon_{\text{A}} = \varepsilon_{\text{D}} \times (\Delta\text{Abs}_{\text{A}} / \Delta\text{Abs}_{\text{D}}) / \Phi_{\text{EnT}}$$

Where  $\varepsilon_{\text{D}}$ ,  $\varepsilon_{\text{A}}$ ,  $\Delta\text{Abs}_{\text{A}}$ , and  $\Delta\text{Abs}_{\text{D}}$  are molar absorption coefficients and delta absorbance of D and A, respectively. Then, considering the ratio of the intersystem crossing of acceptor generated by EnT and the rate constant of EnT, the value of  $\Delta\text{Abs}_{\text{A}}$ , is corrected by the delta absorbance ( $\Delta\text{Abs}_{\text{A, corr.}}$ ), which is taken at the time ( $t_{\text{max}}$ ) of the maximum concentration of  ${}^3\text{A}^*$  and the raw data of delta absorbance ( $\Delta\text{Abs}_{\text{A, raw}}$ ) at  $t_{\text{max}}$  as follows:

$$\Delta\text{Abs}_{\text{A, corr.}} = \Delta\text{Abs}_{\text{A, raw}} \times \exp(k_{\text{A}}t_{\text{max}})$$

$$t_{\text{max}} = \ln(k_{\text{A}} / (k_{\text{EnT}}[\text{A}] + k_{0, \text{D}})) / (k_{\text{A}} - k_{\text{EnT}}[\text{A}] - k_{0, \text{D}})$$

In this study, anthracene (Anth) was employed as an energy donor (D) because EnT process is energetically feasible considering the energy of triplet excited state of Anth (1.8 eV)<sup>11</sup> and Tet (1.2 eV).<sup>9, 10</sup> The molar extinction coefficient of triplet excited state of Anth was reported as 47,700 M<sup>-1</sup> cm<sup>-1</sup> at 425 nm in THF. The obtained rate constant of the EnT ( $k_{\text{EnT}}$ ) shows that EnT process approximately proceeded in all systems according to the diffusion-limited mechanism in THF. The concentrations of Tet derivatives in the measurement were corrected by steady-state absorption spectra.

Then, the concentrations of the triplet excited state ( $[{}^3\text{T}^*]$ ) were estimated as follows:

$$[{}^3\text{T}^*] = \Delta\text{Abs} (1.0 \mu\text{s}) / (\varepsilon_{\text{T}} \times d)$$

Where,  $\Delta\text{Abs} (1.0 \mu\text{s})$  and  $d$  are the delta absorbance of T-T absorption spectra at 1.0  $\mu\text{s}$

in ps-TAS and cell length, respectively. Finally, the triplet quantum yields ( $\Phi_T$ ) were obtained by the following equation:

$$\Phi_T = [{}^3T^*] / [{}^1S]$$

The average and standard deviation values were calculated following the reported method.<sup>12</sup>

**Table S4** Calculation of  $\Phi_T$  of (Tet)<sub>2</sub>-CyO<sub>10</sub> at different five wavelengths

|                                                  |                      |                      |                      |                      |                       |
|--------------------------------------------------|----------------------|----------------------|----------------------|----------------------|-----------------------|
| Wavelength (nm)                                  | 440                  | 445                  | 450                  | 455                  | 460                   |
| $\epsilon_T$ (M <sup>-1</sup> cm <sup>-1</sup> ) | 29,000               | 29,000               | 27,600               | 25,700               | 24,700                |
| $\Delta$ Abs (1.0 $\mu$ s)                       | 0.0036               | 0.0036               | 0.0030               | 0.0026               | 0.0024                |
| [ <sup>3</sup> T*] (M)                           | $1.2 \times 10^{-7}$ | $1.2 \times 10^{-7}$ | $1.1 \times 10^{-7}$ | $1.0 \times 10^{-7}$ | $0.97 \times 10^{-7}$ |
| $\Phi_T$ (%)                                     | 15                   | 15                   | 14                   | 13                   | 12                    |

The  $\Phi_T$  of (Tet)<sub>2</sub>-CyO<sub>10</sub> in THF was estimated to be  $14 \pm 1.2\%$ .

**Table S5** Calculation of  $\Phi_T$  of (Tet)<sub>2</sub>-CyO<sub>12</sub> at different five wavelengths

|                                                  |                      |                      |                       |                       |                       |
|--------------------------------------------------|----------------------|----------------------|-----------------------|-----------------------|-----------------------|
| Wavelength (nm)                                  | 440                  | 445                  | 450                   | 455                   | 460                   |
| $\epsilon_T$ (M <sup>-1</sup> cm <sup>-1</sup> ) | 26,000               | 27,700               | 28,800                | 29,100                | 30,000                |
| $\Delta$ Abs (1.0 $\mu$ s)                       | 0.0027               | 0.0030               | 0.0028                | 0.00276               | 0.00282               |
| [ <sup>3</sup> T*] (M)                           | $1.0 \times 10^{-7}$ | $1.0 \times 10^{-7}$ | $0.97 \times 10^{-7}$ | $0.95 \times 10^{-7}$ | $0.94 \times 10^{-7}$ |
| $\Phi_T$ (%)                                     | 111                  | 111                  | 108                   | 106                   | 104                   |

The  $\Phi_T$  of (Tet)<sub>2</sub>-CyO<sub>12</sub> in THF was estimated to be  $108 \pm 2.5\%$ .

**Table S6** Calculation of  $\Phi_T$  of Tet-ref at different five wavelengths

|                                                  |                      |                      |                      |                      |                      |
|--------------------------------------------------|----------------------|----------------------|----------------------|----------------------|----------------------|
| Wavelength (nm)                                  | 440                  | 445                  | 450                  | 455                  | 460                  |
| $\epsilon_T$ (M <sup>-1</sup> cm <sup>-1</sup> ) | 25,000               | 24,500               | 23,000               | 21,700               | 19,700               |
| $\Delta$ Abs (1.0 $\mu$ s)                       | 0.00025              | 0.00013              | 0.00027              | 0.00014              | 0.000071             |
| [ <sup>3</sup> T*] (M)                           | $5.1 \times 10^{-8}$ | $2.6 \times 10^{-8}$ | $5.8 \times 10^{-8}$ | $3.1 \times 10^{-8}$ | $1.8 \times 10^{-8}$ |
| $\Phi_T$ (%)                                     | 1.2                  | 0.58                 | 1.2                  | 0.68                 | 0.40                 |

The  $\Phi_T$  of Tet-ref was estimated to be  $0.80 \pm 0.33\%$ .

The  $k_{\text{ISC}}$  value was included in  $k_0$ . The rate constant of solvent relaxation process from  $S_1^*$  to  $S_1$  ( $k_{\text{solv}}$ ) was determined to be  $1.2 \times 10^{11} \text{ s}^{-1}$  by fitting of decay profile of S-S absorption at 602 nm with bi-exponential function. Additionally, the rate constant of deactivation process of  $S_1$  ( $k_0$ ) was determined to be  $1.3 \times 10^8 \text{ s}^{-1}$  by using fluorescence lifetime measurement of Tet-ref (Fig. S26). The  $\Phi_{\text{T}}$  value was already estimated in Table S5 ( $\Phi_{\text{T}} = 0.8 \pm 0.3\%$ ) together with  $k_0 = 1.3 \times 10^8 \text{ s}^{-1}$ . Then, the  $k_{\text{ISC}}$  value of Tet-ref was estimated as follows:  $k_{\text{ISC}} = k_0 \times \Phi_{\text{T}} = 1.1 \times 10^6 \text{ s}^{-1}$ .



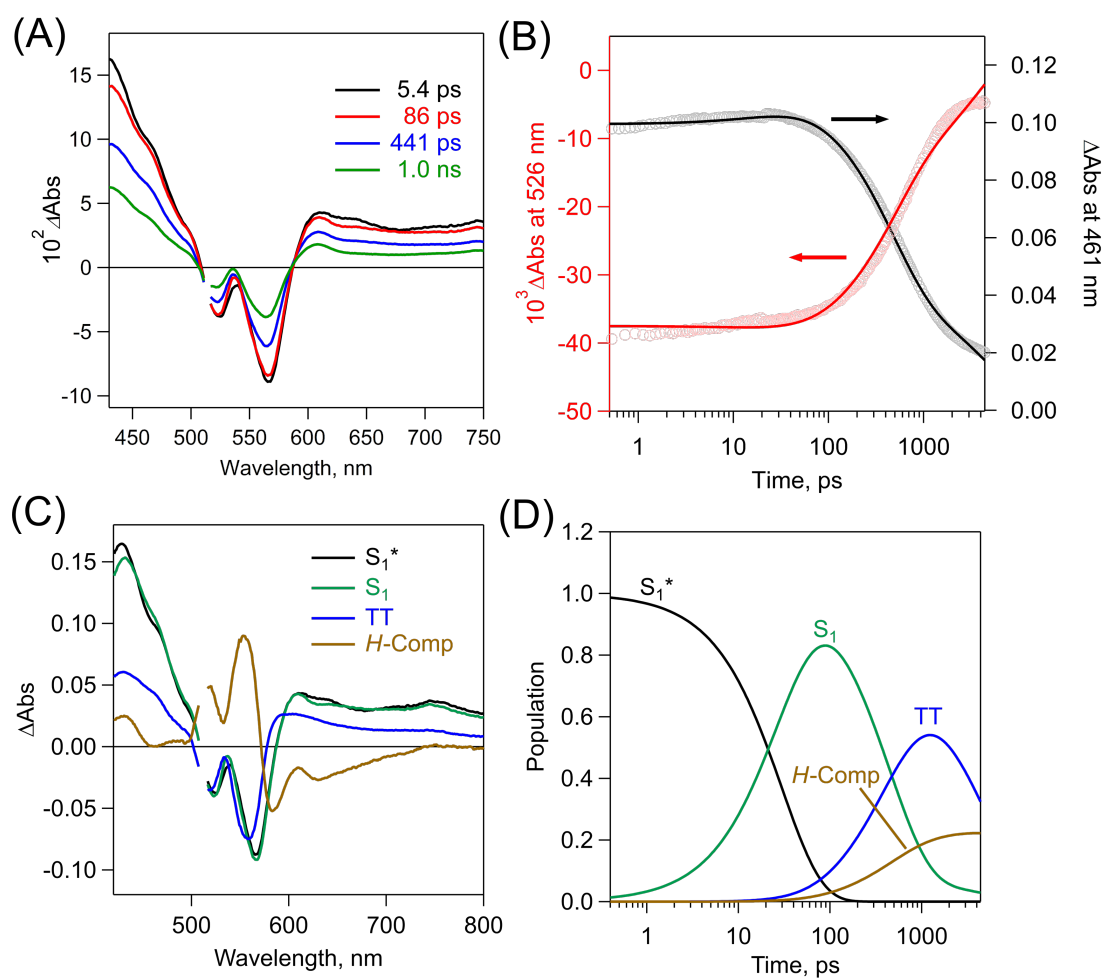

**Fig. S65** (A) fs-TAS of  $(\text{Tet})_2\text{-CyO}_{10}$  in THF ( $\lambda_{\text{ex}} = 532 \text{ nm}$ ). (B) The time profiles at 461 and 526 nm. (C) SAS of  $(\text{Tet})_2\text{-CyO}_{10}$ :  $S_1^*$  (black),  $S_1$  (green), TT (blue) and  $H\text{-Comp}$  (brown). (D) The time-dependent population profiles.

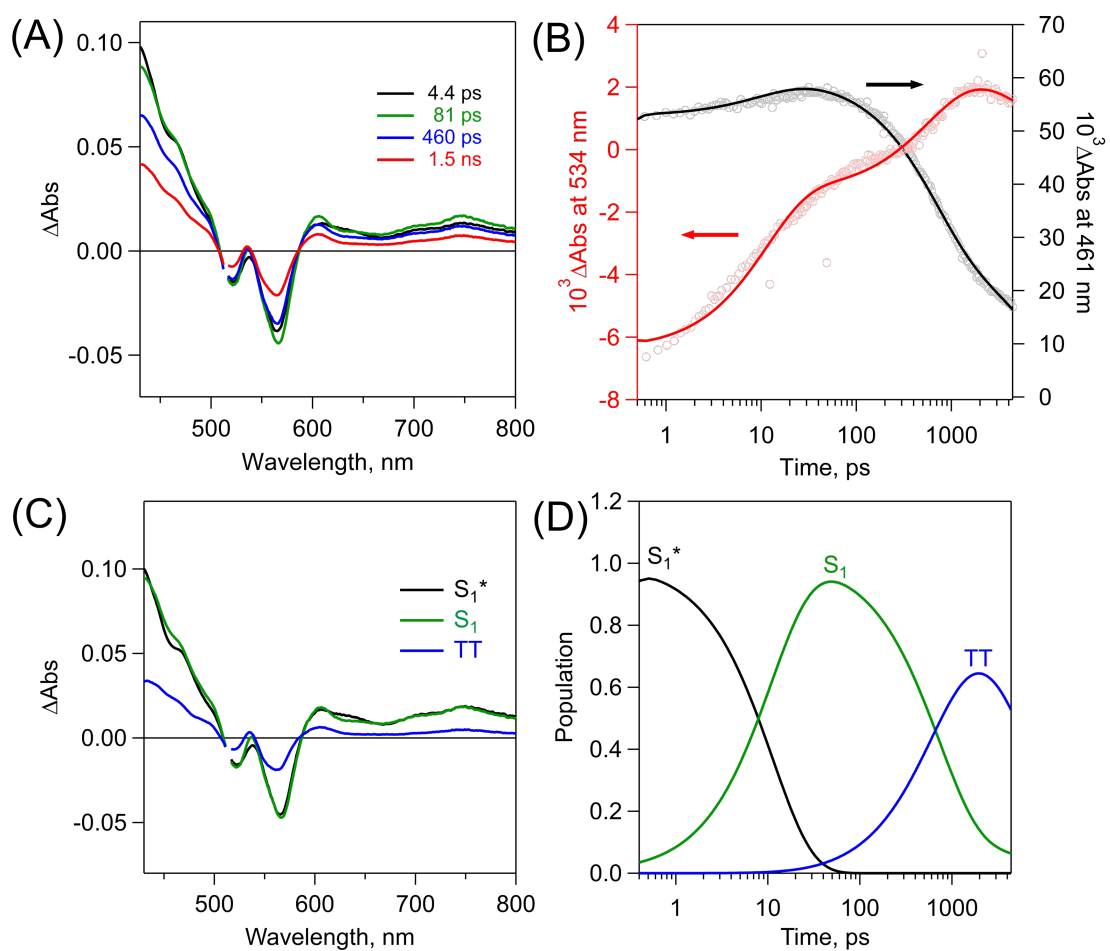

**Fig. S66** (A) fs-TAS of (Tet)<sub>2</sub>-CyO<sub>12</sub> in THF ( $\lambda_{\text{ex}} = 532$  nm). (B) The time profiles at 461 and 534 nm. (C) SAS of (Tet)<sub>2</sub>-CyO<sub>12</sub>:  $S_1^*$  (black),  $S_1$  (green) and TT (blue). (D) The time-dependent population profiles.

## Global and Target Analysis<sup>2</sup>

Target (differential equation-based) analysis can be performed using the Glotaran software package (<http://glotaran.org>) for analysis of species-associated spectra (SAS) (Fig. 5 in the text and Figs. S65 and S66 in ESI†). To describe the transient absorption data of  $(\text{Tet})_2\text{-CyO}_n$ , the normalized concentrations of  $S_1^*$ ,  $S_1$ , TT,  $H\text{-Comp}$  and  $T_1+T_1$  were modelled using the following scheme (Scheme S4).

**Scheme S4** Proposed kinetic scheme of (A)  $(\text{Tet})_2\text{-CyO}_{10}$  and (B)  $(\text{Tet})_2\text{-CyO}_{12}$ .

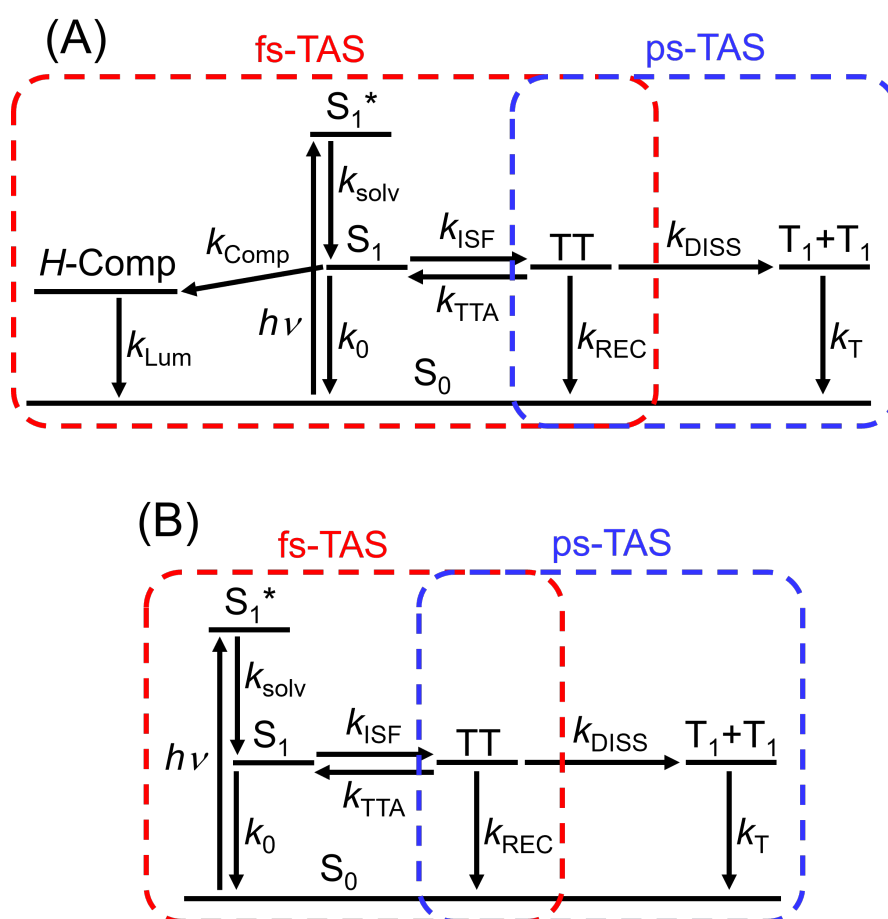

Then, the population of  $S_1^*$ ,  $S_1$ , TT and  $T_1+T_1$  in  $(\text{Tet})_2\text{-CyO}_{10}$  can be described using the following kinetic equations. The rate constant of the initial solvent relaxation process from  $S_1^*$  to  $S_1$  is denoted as  $k_{\text{solv}}$ . Then, the ISF from  $S_1$  to TT ( $k_{\text{ISF}}$ ), deactivation process from  $S_1$  ( $k_0$ ) to the ground state ( $S_0$ ), reverse process of ISF: triplet-triplet annihilation (TTA) ( $k_{\text{TTA}}$ ), the direct recombination process ( $k_{\text{REC}}$ ) from the TT to  $S_0$ , the dissociation process ( $k_{\text{DISS}}$ ) from TT to  $T_1+T_1$  and deactivation process ( $k_{\text{T}}$ ) from the  $T_1+T_1$  to  $S_0$  are

included.

$$\frac{d[S_1^*]}{dt} = -k_{\text{solv}} [S_1^*]$$

$$\frac{d[S_1]}{dt} = k_{\text{solv}} [S_1^*] + k_{\text{TTA}}[\text{TT}] - (k_0 + k_{\text{ISF}}) [S_1]$$

$$\frac{d[\text{TT}]}{dt} = k_{\text{ISF}} [S_1] - (k_{\text{TTA}} + k_{\text{DISS}} + k_{\text{REC}}) [\text{TT}]$$

$$\frac{d[T_1 + T_1]}{dt} = k_{\text{DISS}} [\text{TT}] - k_{\text{T}} [T_1 + T_1]$$

These equations were solved using the method described in a previous report.<sup>13</sup> In the case of the target analysis of fs-TAS and ps-TAS, the analysis was performed with the equation:  $1/\tau_{\text{TT}} = k_{\text{TT}}$ . The  $k_0$  is the value of Tet-ref. In contrast, in (Tet)<sub>2</sub>-CyO<sub>12</sub>, the concentrations of S<sub>1</sub>\*, S<sub>1</sub>, TT, T<sub>1</sub>+T<sub>1</sub> and *H*-Comp can be described by the following kinetic equations: the rate constant for the initial solvent relaxation process from S<sub>1</sub> to S<sub>1</sub>\* is denoted as  $k_{\text{solv}}$ . Then, the ISF from S<sub>1</sub> to TT ( $k_{\text{ISF}}$ ), the deactivation process from S<sub>1</sub> to the ground state ( $k_0$ ), the inverse process of the ISF: triplet-triplet annihilation (TTA) ( $k_{\text{TTA}}$ ), the *H*-Comp formation from S<sub>1</sub> ( $k_{\text{Comp}}$ ), the deactivation process from *H*-Comp to the ground state ( $k_{\text{Lum}}$ ), the direct recombination process ( $k_{\text{REC}}$ ) from the TT to S<sub>0</sub>, the dissociation process ( $k_{\text{DISS}}$ ) from TT to T<sub>1</sub>+T<sub>1</sub> and deactivation process ( $k_{\text{T}}$ ) from the T<sub>1</sub>+T<sub>1</sub> to S<sub>0</sub> are included.

$$\frac{d[S_1^*]}{dt} = -k_{\text{solv}} [S_1^*]$$

$$\frac{d[S_1]}{dt} = k_{\text{solv}} [S_1^*] + k_{\text{TTA}}[\text{TT}] - (k_0 + k_{\text{ISF}} + k_{\text{Comp}}) [S_1]$$

$$\frac{d[\text{TT}]}{dt} = k_{\text{ISF}} [S_1] - (k_{\text{TTA}} + k_{\text{DISS}} + k_{\text{REC}}) [\text{TT}]$$

$$\frac{d [H - \text{Comp}]}{dt} = k_{\text{Comp}} [S_1] - k_{\text{Lum}} [H - \text{Comp}]$$

$$\frac{d [T_1 + T_1]}{dt} = k_{\text{DISS}} [TT] - k_T [T_1 + T_1]$$

The results of target analysis were summarized in Table 1 in the text and Tables S7 and S8 in the ESI†.

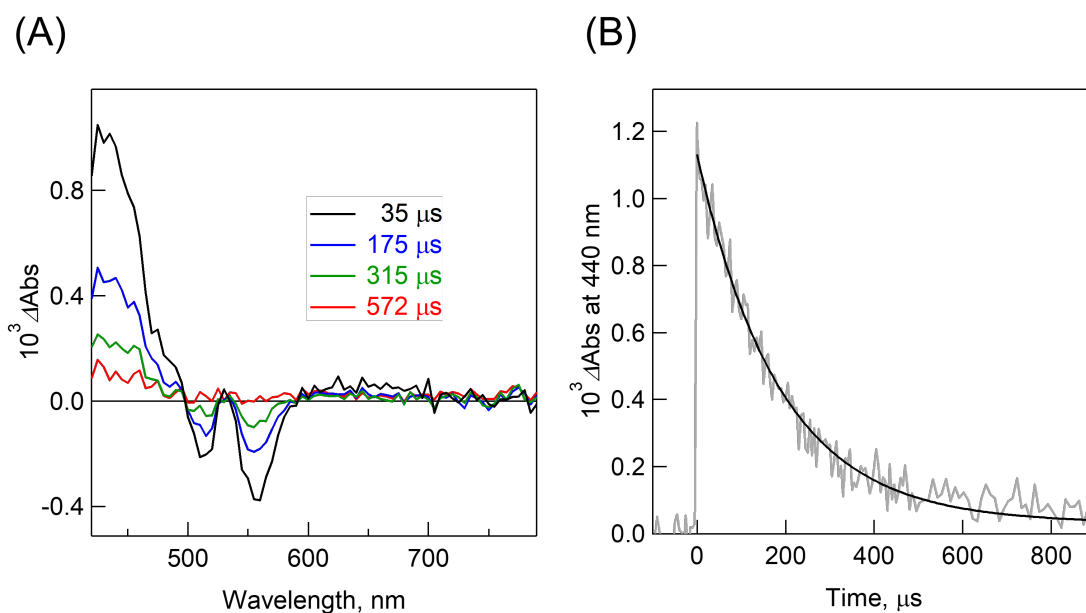

**Fig. S67** ns-TAS of (A) (Tet)<sub>2</sub>-CyO<sub>10</sub> in THF ( $\lambda_{\text{ex}} = 532$  nm) and (B) time profile at 430 nm. The individual triplet lifetime of (Tet)<sub>2</sub>-CyO<sub>10</sub> was determined to be 186  $\mu\text{s}$ .

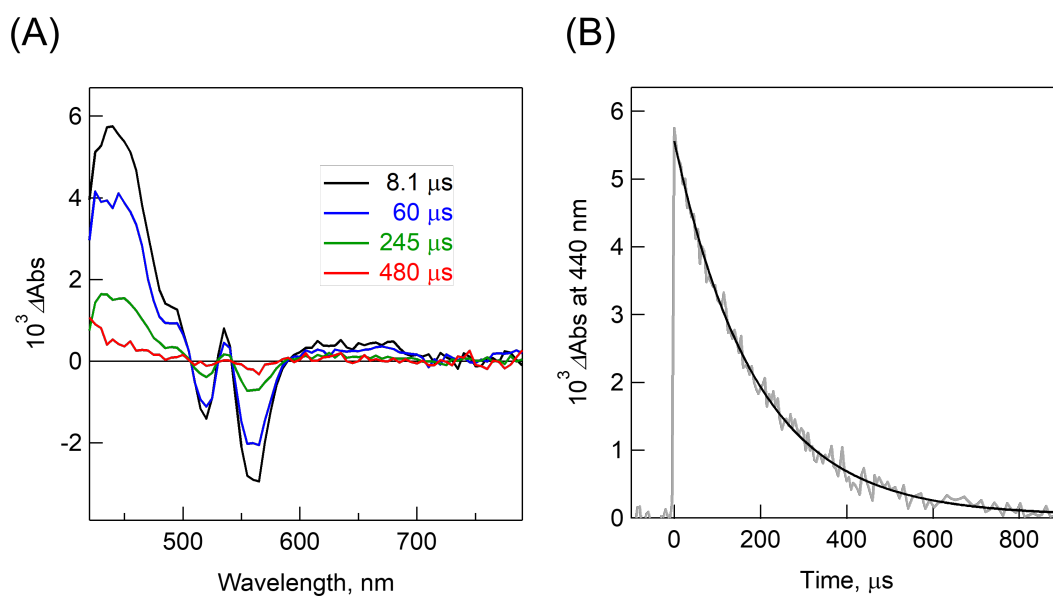

**Fig. S68** ns-TAS of (A) (Tet)<sub>2</sub>-CyO<sub>12</sub> in THF ( $\lambda_{\text{ex}} = 532$  nm) and (B) time profile at 430 nm. The individual triplet lifetime of (Tet)<sub>2</sub>-CyO<sub>12</sub> was determined to be 187  $\mu\text{s}$ .

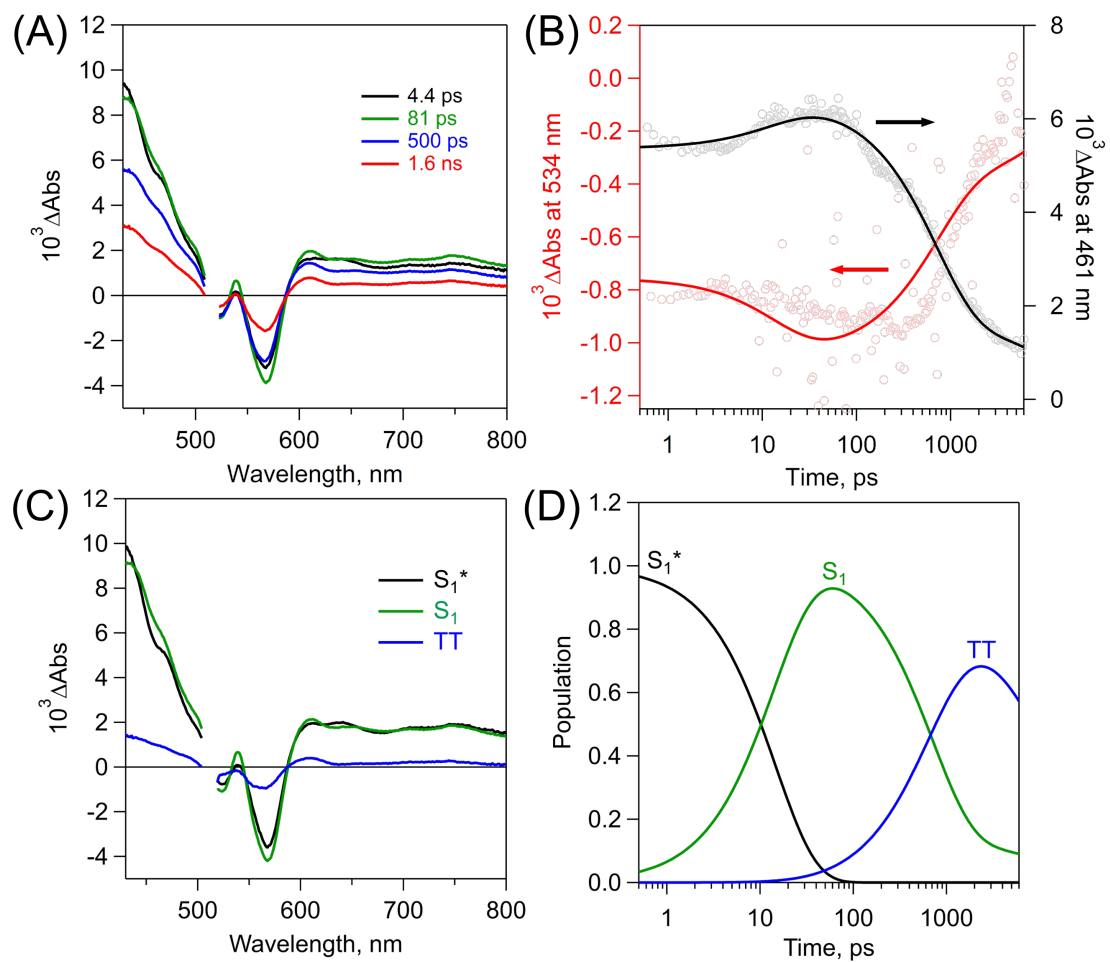

**Fig. S69** (A) fs-TAS of (Tet)<sub>2</sub>-CyO<sub>12</sub> in toluene ( $\lambda_{\text{ex}}$ : 515 nm). (B) The time profiles at 534 and 461 nm. (C) SAS of (Tet)<sub>2</sub>-CyO<sub>12</sub>:  $S_1^*$  (black),  $S_1$  (green) and TT (blue). (D) The time-dependent population profiles.

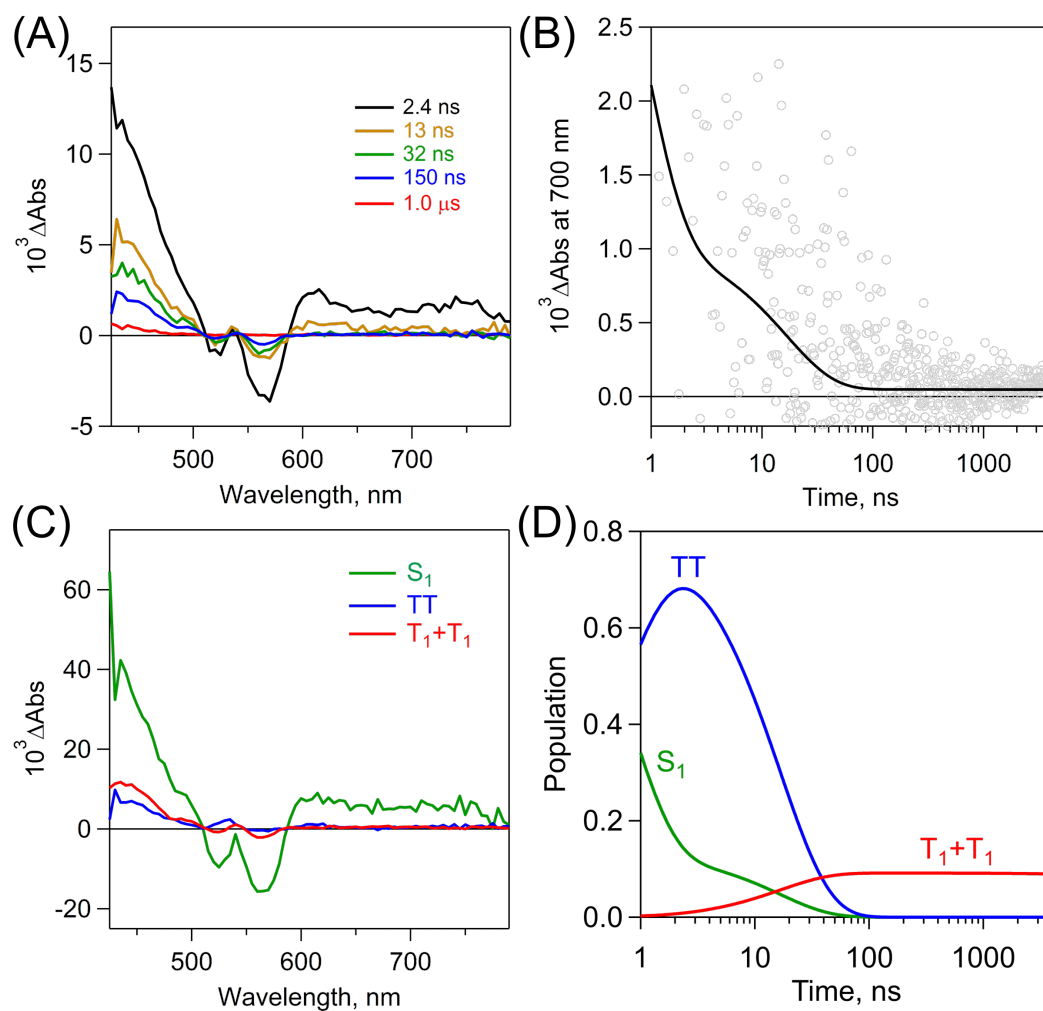

**Fig. S70** (A) ps-TAS of  $(\text{Tet})_2\text{-CyO}_{12}$  in toluene ( $\lambda_{\text{ex}}$ : 532 nm). (B) The time profile at 700 nm. (C) SAS of  $(\text{Tet})_2\text{-CyO}_{12}$ :  $S_1$  (green), TT (blue) and  $T_1+T_1$  (red). (D) The time-dependent population profiles.



**Table S7** Summarized kinetic parameters and quantum yields of (Tet)<sub>2</sub>-CyO<sub>12</sub> in THF and toluene.

|         | $k_{\text{soln}},^a$<br>10 <sup>10</sup> s <sup>-1</sup> | $k_0,^b$<br>10 <sup>8</sup> s <sup>-1</sup> | $k_{\text{ISF}},^a$<br>10 <sup>9</sup> s <sup>-1</sup> | $k_{\text{TTA}},^a$<br>10 <sup>8</sup> s <sup>-1</sup> | $k_{\text{REC}},^c$<br>10 <sup>7</sup> s <sup>-1</sup> | $k_{\text{DISS}},^d$<br>10 <sup>7</sup> s <sup>-1</sup> | $k_{\text{ISF}}/k_{\text{TTA}}$<br><br>( $k_{\text{DISS}}/k_{\text{REC}}$ ) | $k_{\text{T}}, 10^3 \text{ s}^{-1}$<br><br>( $\tau_{\text{T}}, \text{ms}$ ) | $\Phi_{\text{TT}},^f$<br>% | $\Phi_{\text{T}},^g$<br>% |
|---------|----------------------------------------------------------|---------------------------------------------|--------------------------------------------------------|--------------------------------------------------------|--------------------------------------------------------|---------------------------------------------------------|-----------------------------------------------------------------------------|-----------------------------------------------------------------------------|----------------------------|---------------------------|
| THF     | 8.8                                                      | 1.3                                         | 1.1                                                    | 1.1                                                    | 6.1                                                    | 5.7                                                     | 10<br>(0.93)                                                                | 5.5 <sup>e</sup><br>(0.19 <sup>e</sup> )                                    | 69                         | 108±2.5 <sup>g</sup>      |
| toluene | 6.8                                                      | 1.3                                         | 1.0                                                    | 1.9                                                    | 4.2                                                    | 0.70                                                    | 5.3<br>(0.17)                                                               | –                                                                           | 67                         | 18 <sup>h</sup>           |

<sup>a</sup> Estimated by target analysis of fs-TAS. <sup>b</sup> Calculated by  $k_0 = (\tau_{\text{S}})^{-1}$ ,  $\tau_{\text{S}}$  was estimated by fluorescence lifetime of Tet-ref ( $\tau_{\text{S}}$ : 7.6 ns). <sup>c</sup> Calculated by  $k_{\text{REC}} = k_{\text{TT}} - k_{\text{DISS}} = (\tau_{\text{TT}})^{-1} - k_{\text{DISS}}$ ,  $\tau_{\text{TT}}$  was estimated by target analysis of ps-TAS. <sup>d</sup> Calculated by  $k_{\text{DISS}} = k_{\text{TT}} \times \Phi_{\text{T}} / (2\Phi_{\text{TT}})$ . <sup>e</sup> Calculated by  $k_{\text{T}} = (\tau_{\text{T}})^{-1}$ ,  $\tau_{\text{T}}$  was estimated by ns-TAS. <sup>f</sup> Estimated by the population of TT (target analysis) considering  $k_{\text{TTA}}$  (Fig. 4C and Figs. S66 and S69-S70 in ESI†). <sup>g</sup> Estimated by ps-TAS (Fig. 5A). <sup>h</sup> Estimated by the population of T<sub>1</sub>+T<sub>1</sub> (target analysis) (Fig. S70 in ESI†).

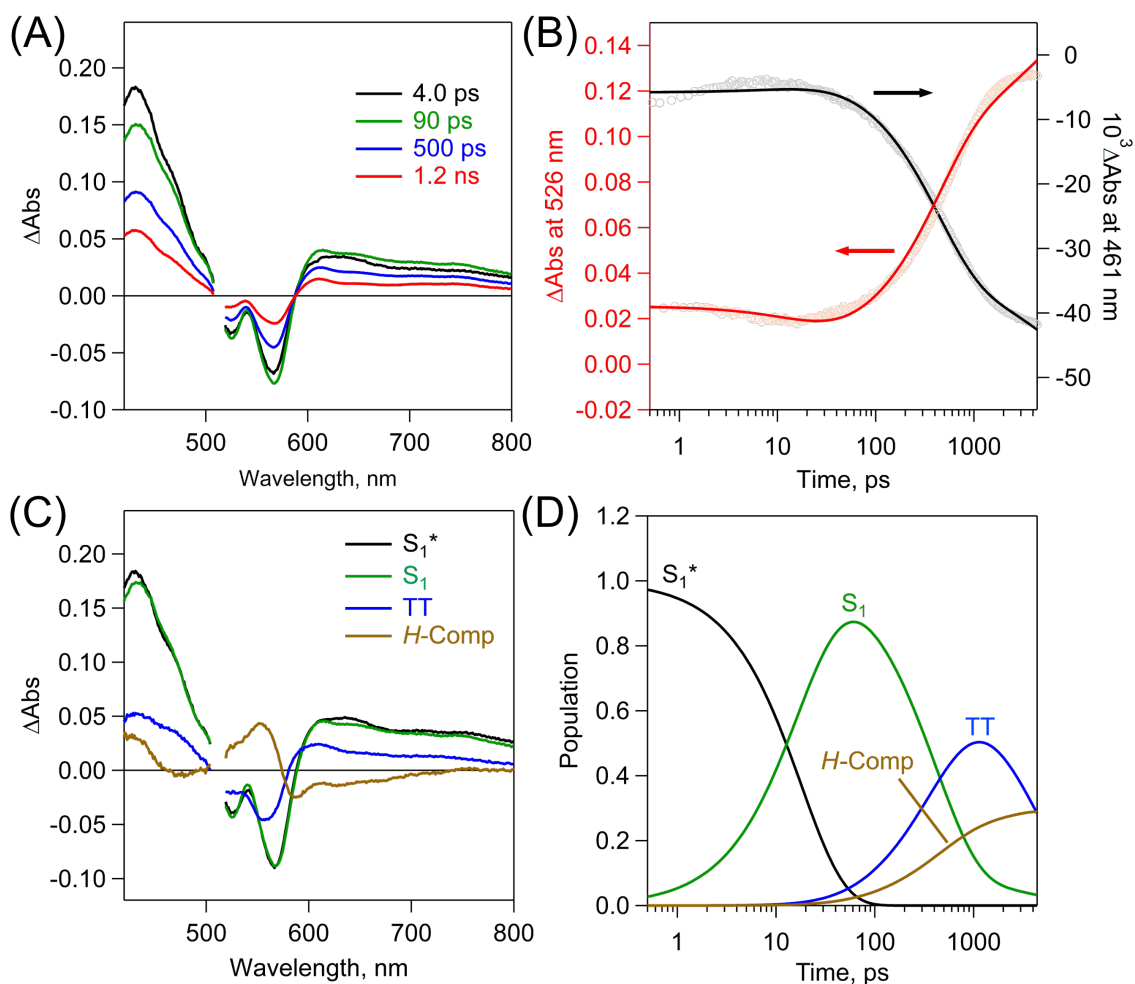

**Fig. S71** (A) fs-TAS of  $(\text{Tet})_2\text{-CyO}_{10}$  in toluene ( $\lambda_{\text{ex}}$ : 515 nm). (B) The time profile at 700 nm. (C) SAS of  $(\text{Tet})_2\text{-CyO}_{10}$ :  $S_1^*$  (black),  $S_1$  (green), TT (blue) and  $H\text{-Comp}$  (brown). (D) Time-dependent population profiles.

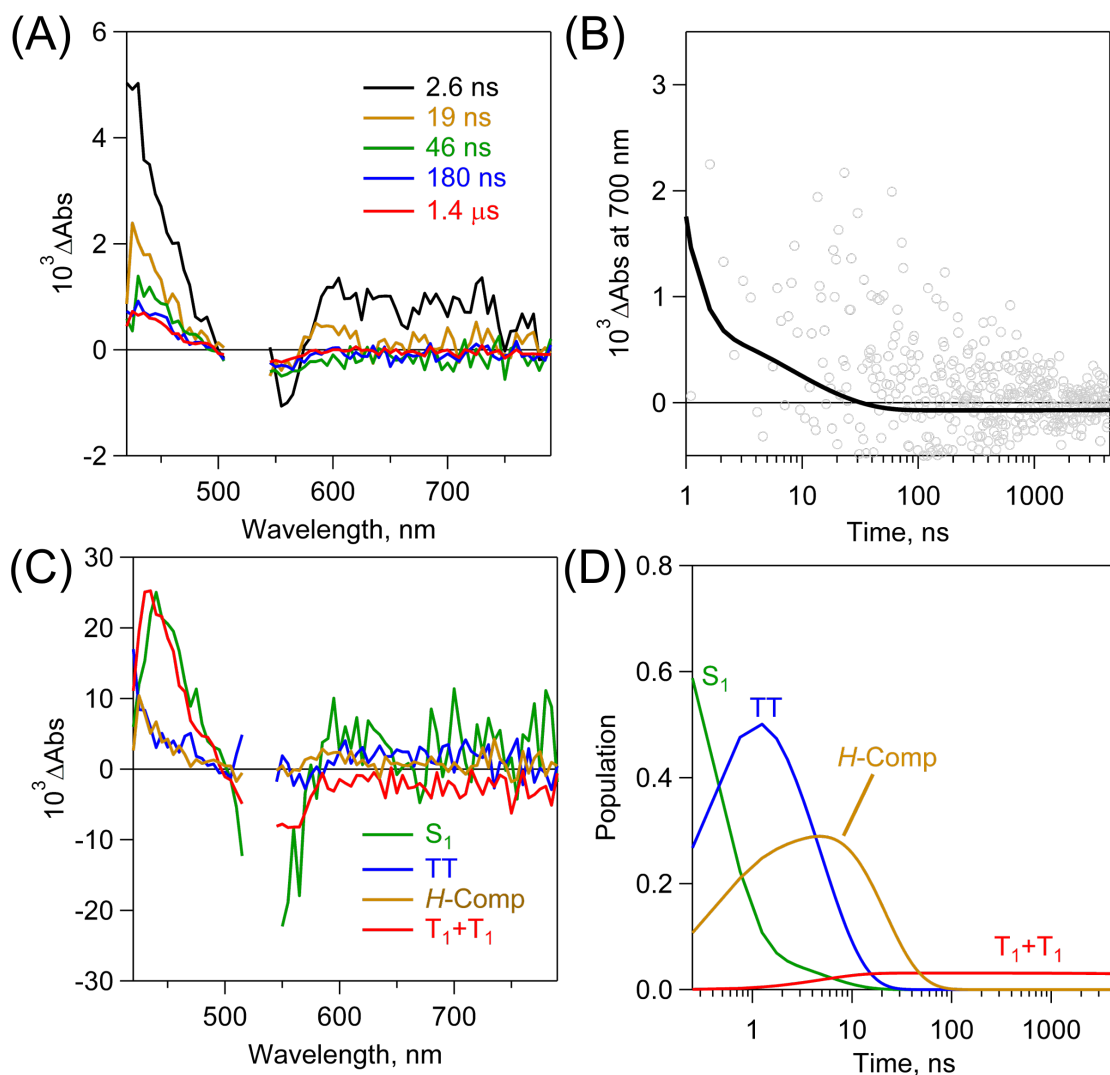

**Fig. S72** (A) ps-TAS of  $(\text{Tet})_2\text{-CyO}_{10}$  in toluene ( $\lambda_{\text{ex}}$ : 532 nm). (B) The time profile at 700 nm. (C) SAS of  $(\text{Tet})_2\text{-CyO}_{10}$ :  $S_1$  (green), TT (blue),  $H\text{-Comp}$  (brown) and  $T_1+T_1$  (red). (D) Time-dependent population profiles.

**Table S8** Summarized kinetic parameters and quantum yields of (Tet)<sub>2</sub>-CyO<sub>10</sub> in THF and toluene.

|         | $k_{\text{solv}},^a$<br>$10^{10} \text{ s}^{-1}$ | $k_0,^b$<br>$10^8 \text{ s}^{-1}$ | $k_{\text{Comp}},^a$<br>$10^8 \text{ s}^{-1}$ | $k_{\text{Lum}},$<br>$10^7 \text{ s}^{-1}$ | $k_{\text{ISF}},^a$<br>$10^9 \text{ s}^{-1}$ | $k_{\text{TTA}},^a$<br>$10^8 \text{ s}^{-1}$ | $k_{\text{REC}},^e$<br>$10^7 \text{ s}^{-1}$ | $k_{\text{DISS}},^f$<br>$10^7 \text{ s}^{-1}$ | $k_{\text{ISF}}/k_{\text{Comp}}$ | $k_{\text{ISF}}/k_{\text{TTA}}$<br>( $k_{\text{DISS}}/k_{\text{REC}}$ ) | $k_{\text{T}}, 10^3 \text{ s}^{-1}$<br>( $\tau_{\text{T}}, \text{ms}$ ) | $\Phi_{\text{TT}},^h$<br>% | $\Phi_{\text{T}},$<br>% |
|---------|--------------------------------------------------|-----------------------------------|-----------------------------------------------|--------------------------------------------|----------------------------------------------|----------------------------------------------|----------------------------------------------|-----------------------------------------------|----------------------------------|-------------------------------------------------------------------------|-------------------------------------------------------------------------|----------------------------|-------------------------|
| THF     | 3.3                                              | 1.3                               | 4.5                                           | 6.7 <sup>c</sup>                           | 1.5                                          | 1.7                                          | 14                                           | 1.4                                           | 3.3                              | 8.8<br>(0.10)                                                           | 5.4 <sup>g</sup><br>(0.19 <sup>g</sup> )                                | 65                         | 14±1.<br>2 <sup>h</sup> |
| toluene | 5.5                                              | 1.3                               | 5.8                                           | 6.0 <sup>d</sup>                           | 1.5                                          | 2.3                                          | 13                                           | 1.2                                           | 2.6                              | 6.5<br>(0.071)                                                          | –                                                                       | 50                         | 8.0 <sup>i</sup>        |

<sup>a</sup> Estimated by target analysis of fs-TAS. <sup>b</sup> Calculated by  $k_0 = (\tau_{\text{S}})^{-1}$ ,  $\tau_{\text{S}}$  was estimated by fluorescence lifetime of Tet-ref ( $\tau_{\text{S}}$ : 7.6 ns). <sup>c</sup> Calculated by  $k_{\text{Lum}} = (\tau_{\text{Lum}})^{-1}$ ,  $\tau_{\text{Lum}}$  was estimated by fluorescence lifetime of (Tet)<sub>2</sub>-CyO<sub>10</sub> ( $\tau_{\text{Lum}}$ : 15.2 ns). <sup>d</sup> Estimated by target analysis of ps-TAS. <sup>e</sup> Calculated by  $k_{\text{REC}} = k_{\text{TT}} - k_{\text{DISS}} = (\tau_{\text{TT}})^{-1} - k_{\text{DISS}}$ ,  $\tau_{\text{TT}}$  was estimated by target analysis of ps-TAS. <sup>f</sup> Calculated by  $k_{\text{DISS}} = k_{\text{TT}} \times \Phi_{\text{T}} / (2\Phi_{\text{TT}})$ . <sup>g</sup> Calculated by  $k_{\text{T}} = (\tau_{\text{T}})^{-1}$ ,  $\tau_{\text{T}}$  was estimated by ns-TAS. <sup>h</sup> Estimated by the population of TT (target analysis) considering  $k_{\text{TTA}}$  (Fig. 5E and Figs. S66 and S71-S72 in ESI†). <sup>i</sup> Estimated by ps-TAS (Fig. 5C). <sup>j</sup> Estimated by the population ratio of T<sub>1</sub>+T<sub>1</sub> (target analysis) (Fig. S72 in ESI†).

## References

1. T. Nakagawa, K. Okamoto, H. Hanada and R. Katoh, *Opt. Lett.*, 2016, **41**, 1498-1501.
2. J. J. Snellenburg, S. Laptanok, R. Seger, K. M. Mullen and I. H. M. van Stokkum, *J. Stat. Softw.*, 2012, **49**, 1-22.
3. R. Shiraishi, S. Matsumoto, Y. Fuchi, T. Naganuma, D. Yoshihara, K. Usui, K. Yamada and S. Karasawa, *Langmuir*, 2020, **36**, 5280-5286.
4. F. Pineux, S. Federico, K.-N. Klotz, S. Kachler, C. Michiels, M. Sturlese, M. Prato, G. Spalluto, S. Moro and D. Bonifazi, *ChemMedChem*, 2020, **15**, 1909-1920.
5. J. Hoogboom and T. M. Swager, *J. Am. Chem. Soc.*, 2006, **128**, 15058-15059.
6. W. Fudickar and T. Linker, *J. Am. Chem. Soc.*, 2012, **134**, 15071-15082.
7. Y.-S. Wang, S. Bai, Y.-Y. Wang and Y.-F. Han, *Chem. Commun.*, 2019, **55**, 13689-13692.
8. B. J. Walker, A. J. Musser, D. Beljonne and R. H. Friend, *Nat. Chem.*, 2013, **5**, 1019-1024.
9. S. Nakamura, H. Sakai, H. Nagashima, Y. Kobori, N. V. Tkachenko and T. Hasobe, *ACS Energy Lett.*, 2019, **4**, 26-31.
10. T. Sakuma, H. Sakai, Y. Araki, T. Mori, T. Wada, N. V. Tkachenko and T. Hasobe, *J. Phys. Chem. A*, 2016, **120**, 1867-1875.
11. P. Avakian, E. Abramson, R. G. Kepler and J. C. Caris, *J. Chem. Phys.*, 1963, **39**, 1127-1128.
12. T. Saegusa, H. Sakai, H. Nagashima, Y. Kobori, N. V. Tkachenko and T. Hasobe, *J. Am. Chem. Soc.*, 2019, **141**, 14720-14727.
13. I. H. M. van Stokkum, D. S. Larsen and R. van Grondelle, *Biochim. Biophys. Acta, Bioenerg.*, 2004, **1657**, 82-104.
